# Supplementary material for: Synthesis and pharmacological evaluation of conformationally restricted κ-opioid receptor agonists
Source: Royal Society of Chemistry journal article supplement (doi:10.1039/c6md00441e), 2016-01-01

## Supporting Information

### Synthesis and pharmacological evaluation of conformationally restricted $\kappa$ -opioid receptor agonists

Yvonne Wenker,<sup>a</sup> Michael Soeberdt,<sup>b</sup> Constantin Daniliuc,<sup>c</sup> Sonja Ständer,<sup>d</sup> Dirk Schepmann,<sup>a</sup> Bernhard Wünsch<sup>\*a,e</sup>

<sup>a</sup> Institut für Pharmazeutische und Medizinische Chemie der Westfälischen Wilhelms-Universität Münster, Corrensstraße 48, D-48149 Münster, Germany

Tel.: +49-251-8333311; Fax: +49-251-8332144; E-mail: [wuensch@uni-muenster.de](mailto:wuensch@uni-muenster.de)

<sup>b</sup> Dr. August Wolff GmbH & Co. KG Arzneimittel, Sudbrackstr. 56, D-33611 Bielefeld, Germany

<sup>c</sup> Organisch-Chemisches Institut der Westfälischen Wilhelms-Universität Münster, Corrensstr. 40, D-48149 Münster, Germany

<sup>d</sup> Center for Chronic Pruritus and Department of Dermatology, University Hospital Münster, von-Esmarch-Straße 58, D-48149 Münster, Germany

<sup>e</sup> Cells-in-Motion Cluster of Excellence ((EXC 1003 – CiM), Westfälische Wilhelms-Universität Münster, Germany

|                                                        |     |
|--------------------------------------------------------|-----|
| Title page                                             | S1  |
| 1. Table SI1: Affinity data of <b>17</b> and <b>18</b> | S2  |
| 2. Experimental, chemistry                             | S3  |
| 2.1. General                                           | S3  |
| 2.2. Synthetic procedures                              | S3  |
| 3. NMR spectra                                         | S16 |

\*To whom correspondence should be addressed:

Tel: #49-251-8333311;

Fax: #49-251-8332144;

Email: [wuensch@uni-muenster.de](mailto:wuensch@uni-muenster.de)

Table SI1: Affinity data of 17 and 18

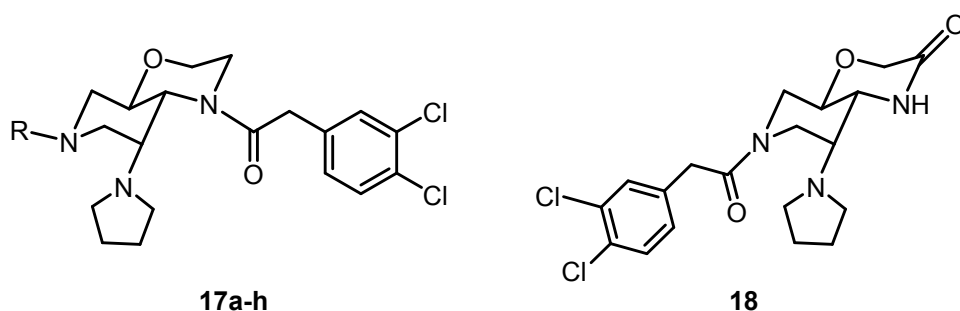

| compd.          | R                                               | $K_i \pm \text{SEM}$ [nM]             |                                 |                                    |                                                 |                                    |
|-----------------|-------------------------------------------------|---------------------------------------|---------------------------------|------------------------------------|-------------------------------------------------|------------------------------------|
|                 |                                                 | $\kappa$<br>[ <sup>3</sup> H]U-69,593 | $\mu$<br>[ <sup>3</sup> H]DAMGO | $\delta$<br>[ <sup>3</sup> H]DPDPE | $\sigma_1$<br>[ <sup>3</sup> H]-(+)-pentazocine | $\sigma_2$<br>[ <sup>3</sup> H]DTG |
| <b>17a</b>      | H                                               | 132 ± 44                              | 26 %                            | 5 %                                | 10 %                                            | 0 %                                |
| <b>17b</b>      | CH <sub>3</sub>                                 | 286 ± 63                              | 6 %                             | 6 %                                | 19 %                                            | 13 %                               |
| <b>17c</b>      | CH <sub>2</sub> CH <sub>3</sub>                 | 1300 <sup>b</sup>                     | 20 %                            | 15 %                               | 391                                             | 102                                |
| <b>17d</b>      | (CH <sub>2</sub> ) <sub>3</sub> CH <sub>3</sub> | 8 %                                   | 502                             | 47 %                               | 192                                             | 316                                |
| <b>17e</b>      | cyclopentyl                                     | 5 %                                   | 447                             | 717                                | 181                                             | 45                                 |
| <b>17f</b>      | CH <sub>2</sub> -phenyl                         | 912 <sup>b</sup>                      | 261 ± 79                        | 260                                | 983                                             | 29 %                               |
| <b>17g</b>      | CH <sub>2</sub> -3-pyridyl                      | 0 %                                   | 633                             | 666                                | 291                                             | 1.4 μM                             |
| <b>17h</b>      | DCPA <sup>a</sup>                               | 0 %                                   | 4 %                             | 0 %                                | 991                                             | 8 %                                |
| <b>18</b>       | -                                               | 0 %                                   | 0 %                             | 0 %                                | 0 %                                             | 13 %                               |
| U-69,593        |                                                 | 0.97 ± 0.40                           | -                               | -                                  | -                                               | -                                  |
| naloxone        |                                                 | 6.9 ± 0.5                             | 2.1 ± 0.5                       | 2.4 ± 0.5                          | -                                               | -                                  |
| morphine        |                                                 | 35 ± 6.0                              | 3.9 ± 2.1                       | 2.0 ± 0.3                          | -                                               | -                                  |
| (+)-pentazocine |                                                 | -                                     | -                               | -                                  | 5.4 ± 0.5                                       | -                                  |
| haloperidol     |                                                 | -                                     | -                               | -                                  | 6.6 ± 0.9                                       | 78 ± 2.3                           |

<sup>a</sup>) DCPA = dichlorophenylacetyl;

$K_i$  values are given as mean values ± SEM of three experiments (n = 3); due to low affinity the  $K_i$  values of some compounds were determined only once; values in % reflect the inhibition of the radioligand binding at a test compound concentration of 1 μM.

## 2. Experimental, chemistry

### 2.1. General

Unless otherwise noted, moisture sensitive reactions were conducted under dry nitrogen. THF was dried with sodium/benzophenone and was freshly distilled before use. Thin layer chromatography (tlc): Silica gel 60 F<sub>254</sub> plates (Merck). Flash chromatography (fc): Silica gel 60, 40–64  $\mu\text{m}$  (Merck); parentheses include: diameter of the column, eluent, fraction size, R<sub>f</sub> value. Melting point: Melting point apparatus SMP 3 (Stuart Scientific), uncorrected. MS: MAT GCQ (Thermo-Finnigan); IR: IR spectrophotometer 480Plus FT-ATR-IR (Jasco). <sup>1</sup>H NMR (400 MHz), <sup>13</sup>C NMR (100 MHz): Unity Mercury Plus 400 spectrometer (Varian);  $\delta$  in ppm related to tetramethylsilane; coupling constants are given with 0.5 Hz resolution.

### 2.2. Synthetic procedures

#### 2.2.1. (4*r*)-(3,5-Dihydroxy-4-nitropiperidin-1-yl)-(phenyl)methanone (8b)

Nitromethane (0.19 mL, 3.57 mmol) was added to a solution of iminodiacetaldehyde **7b** (488 mg, 2.38 mmol) in a mixture of THF (2 mL) and *tert*-butanol (0.5 mL). NaOH (15 mg, 0.38 mmol) was added and the mixture was stirred for 20 h at rt. The solution was neutralized using Amberlite<sup>®</sup> ion exchange resin (IR-120), filtered and the solvent was removed under reduced pressure. The product was purified by fc ( $\varnothing$  = 4 cm, h = 16 cm, CH<sub>2</sub>Cl<sub>2</sub>/ethyl acetate = 2/1, V = 30 mL, R<sub>f</sub> = 0.34 (cyclohexane/ethyl acetate = 2/1)). Colorless solid, mp 135 °C (decomposition), yield 316 mg (50 %). C<sub>12</sub>H<sub>14</sub>N<sub>2</sub>O<sub>5</sub> (M = 266.3 g/mol). <sup>1</sup>H NMR (d<sub>6</sub>-DMSO):  $\delta$  (ppm) = 2.66 – 2.77 (m, 1 H, NCH<sub>2</sub>), 2.93 – 3.09 (m, 1 H, NCH<sub>2</sub>), 3.25 – 3.33 (m, 1 H, NCH<sub>2</sub>), 3.55 – 3.70 (m, 1 H, NCH<sub>2</sub>), 3.78 – 3.94 (m, 2 H, 2 x CHOH), 4.47 (t, <sup>3</sup>J = 9.8 Hz, 1 H, CHNO<sub>2</sub>), 5.58 – 6.12 (m, 2 H, 2 x OH), 7.37 – 7.53 (m, 5 H, 5 x CH<sub>ar</sub>). <sup>13</sup>C NMR (d<sub>6</sub>-DMSO):  $\delta$  (ppm) = 45.6.1 (NCH<sub>2</sub>), 50.9 (NCH<sub>2</sub>), 66.9 (CHOH), 67.6 (CHOH), 96.3 (CHNO<sub>2</sub>), 127.0 (2 C, C<sub>ar</sub>), 128.6 (2 C, C<sub>ar</sub>), 129.9 (C<sub>ar</sub>), 135.2 (C<sub>q</sub>), 169.6 (C=O). MS (ESI): m/z = 289 [M + Na], 555 [2 M + Na].

#### 2.2.2. (4*r*)-1-Allyl-4-nitropiperidine-3,5-diol (8d)

At 0 °C allyl bromide (38.5  $\mu\text{L}$ , 0.45 mmol) was added to a solution of nitropiperidinediol **8c** (72.1 mg, 0.45 mmol) and K<sub>2</sub>CO<sub>3</sub> (61.5 mg, 0.45 mmol) in THF (2 mL). After 24 h stirring at rt, the solvent was removed under reduced pressure and the product was purified by fc ( $\varnothing$  = 2 cm, h = 17 cm, cyclohexane/ethyl acetate = 2/1,

$V = 10$  mL,  $R_f = 0.64$  ( $\text{CH}_2\text{Cl}_2/\text{CH}_3\text{OH} = 9/1$ ). Colorless crystals, yield 14.1 mg (15 %).  $\text{C}_8\text{H}_{14}\text{N}_2\text{O}_4$  ( $M = 202.2$  g/mol).  $^1\text{H}$  NMR ( $d_6$ -DMSO):  $\delta$  (ppm) = 1.87 (t,  $^2J = 10.8$  Hz,  $^3J = 10.8$  Hz, 2 H, 2- $\text{CH}_{2\text{ax}}$ , 6- $\text{CH}_{2\text{ax}}$ ), 2.92 (dd,  $^2J = 11.2$  Hz,  $^3J = 4.6$  Hz, 2 H, 2- $\text{CH}_{2\text{eq}}$ , 6- $\text{CH}_{2\text{eq}}$ ), 3.01 (d broad,  $^3J = 6.4$  Hz, 2 H,  $\text{NCH}_2\text{CH}=\text{CH}_2$ ), 3.80 – 3.94 (m, 2 H, 2 x  $\text{CHOH}$ ), 4.14 (t,  $^3J = 9.8$  Hz, 1 H,  $\text{CHNO}_2$ ), 5.11 – 5.25 (m, 2 H,  $\text{NCH}_2\text{CH}=\text{CH}_2$ ), 5.63 (d broad, 2 H, 2 x  $\text{OH}$ ), 5.71 – 5.88 (m, 1 H,  $\text{NCH}_2\text{CH}=\text{CH}_2$ ). MS (EM, ESI):  $m/z = \text{calcd. for } \text{C}_8\text{H}_{15}\text{N}_2\text{O}_4$  [ $M + \text{H}$ ] 203.1031, found 203.1019. IR (neat):  $\tilde{\nu}$  ( $\text{cm}^{-1}$ ) = 3514/3287 (m, O-H), 2924/2855 (w, C-H), 1559/1373 (s, C- $\text{NO}_2$ ). Purity (HPLC): 93.2 %,  $t_R = 3.41$  min (method  $\text{CH}_3\text{CN}$ ).

### 2.2.3. (4*r*)-1-Benzyl-4-nitropiperidine-3,5-diol (8e)

Trifluoroacetic acid (0.12 mL, 1.52 mmol) was added to a solution of nitropiperidinediol **8c** (80.0 mg, 0.30 mmol) in  $\text{CH}_2\text{Cl}_2$  (5 mL). The mixture was stirred for 3 h at rt. The solvent was removed under reduced pressure and the residue was dissolved in  $\text{CH}_3\text{CN}$  (1 mL). Triethylamine (42  $\mu\text{L}$ , 0.30 mmol) was added to the solution and the mixture was stirred for 10 min. Then benzaldehyde (33  $\mu\text{L}$ , 0.33 mmol) and after 30 min  $\text{NaBH}(\text{OAc})_3$  (89.0 mg, 0.42 mmol) were added to the mixture. After 20 h the transformation was stopped by addition of a small amount of water, the solvent was removed under reduced pressure and the product was purified by fc ( $\varnothing = 3$  cm,  $h = 20$  cm,  $\text{CH}_2\text{Cl}_2/\text{ethyl acetate} = 4/1$ ,  $V = 20$  mL,  $R_f = 0.20$  ( $\text{CH}_2\text{Cl}_2/\text{CH}_3\text{OH} = 10/1$ )). Colorless resin, yield 39.0 mg (50 %).  $\text{C}_{12}\text{H}_{16}\text{N}_2\text{O}_4$  ( $M = 252.3$  g/mol).  $^1\text{H}$  NMR ( $d_6$ -DMSO):  $\delta$  (ppm) = 1.89 (t,  $^2J = 10.8$  Hz,  $^3J = 10.8$  Hz, 2 H, 2- $\text{CH}_{2\text{ax}}$ , 6- $\text{CH}_{2\text{ax}}$ ), 2.89 (dd,  $^2J = 11.4$  Hz,  $^3J = 4.7$  Hz, 2 H, 2- $\text{CH}_{2\text{eq}}$ , 6- $\text{CH}_{2\text{eq}}$ ), 3.44 – 3.54 (m, 2 H,  $\text{ArCH}_2$ ), 3.83 – 3.92 (m, 2 H, 2 x  $\text{CHOH}$ ), 4.15 (t,  $^3J = 9.8$  Hz, 1 H,  $\text{CHNO}_2$ ), 5.63 (d,  $^3J = 6.2$  Hz, 2 H, 2 x  $\text{OH}$ ), 7.25 – 7.36 (m, 5 H,  $\text{CH}_{\text{ar}}$ ).  $^{13}\text{C}$  NMR ( $d_6$ -DMSO):  $\delta$  (ppm) = 57.6 (2 x  $\text{NCH}_2$ ), 60.6 ( $\text{ArCH}_2$ ), 68.2 (2 x  $\text{CHOH}$ ), 97.3 ( $\text{CHNO}_2$ ), 127.3 ( $\text{C}_{\text{ar}}$ ), 128.4 (2 C,  $\text{C}_{\text{ar}}$ ), 128.9 (2 C,  $\text{C}_{\text{ar}}$ ), 137.8 ( $\text{C}_{\text{q}}$ ). MS (ESI):  $m/z = 253$  [ $M + \text{H}$ ], 275 [ $M + \text{Na}$ ]. IR (neat):  $\tilde{\nu}$  ( $\text{cm}^{-1}$ ) = 3433 (w, O-H), 2932/2844 (w, C-H), 1544 (s, C- $\text{NO}_2$ ), 752/705 (s, Ar), 641 (m, Ar). Purity (HPLC): 97.5 %,  $t_R = 4.57$  min (method  $\text{CH}_3\text{CN}$ ).

#### 2.2.4. (4*r*)-1-(4-Methoxybenzyl)-4-nitropiperidine-3,5-diol (**8f**)

Trifluoroacetic acid (0.12 mL, 1.52 mmol) was added to a solution of nitropiperidinediol **8c** (80.0 mg, 0.31 mmol) in CH<sub>2</sub>Cl<sub>2</sub> (5 mL). The mixture was stirred for 3 h at rt. The solvent was removed under reduced pressure and the residue was dissolved in THF (1 mL). Then 4-methoxybenzaldehyde (36 μL, 0.30 mmol) and triethylamine (42 μL, 0.3 mmol) were added to the solution. After stirring for 30 min, NaBH(OAc)<sub>3</sub> (89.3 mg, 0.42 mmol) was added and the mixture was stirred for 1 h. The transformation was stopped by addition of a small amount of water and the solvent was removed under reduced pressure. The product was purified by fc (∅ = 2 cm, h = 15 cm, CH<sub>2</sub>Cl<sub>2</sub>/ethyl acetate = 3/1, V = 10 mL, R<sub>f</sub> = 0.28). Colorless resin, yield 32.2 mg (38 %). C<sub>13</sub>H<sub>18</sub>N<sub>2</sub>O<sub>5</sub> (M = 282.3 g/mol). <sup>1</sup>H NMR (d<sub>6</sub>-DMSO): δ (ppm) = 1.85 (t, <sup>2</sup>J = 10.8 Hz, <sup>3</sup>J = 10.8 Hz, 2 H, 2-CH<sub>2</sub>, 6-CH<sub>2</sub>), 2.88 (dd, <sup>2</sup>J = 11.2 Hz, <sup>3</sup>J = 4.6 Hz, 2 H, 2-CH<sub>2</sub>, 6-CH<sub>2</sub>), 3.47 (s, 2 H, ArCH<sub>2</sub>), 3.73 (s, 3 H, OCH<sub>3</sub>), 3.78 – 3.93 (m, 2 H, 2 x CHOH), 4.13 (t, <sup>3</sup>J = 9.8 Hz, 1 H, CHNO<sub>2</sub>), 5.62 (d, <sup>3</sup>J = 6.2 Hz, 2 H, 2 x OH), 6.89 (d, <sup>3</sup>J = 8.7 Hz, 2 H, 2 x CH<sub>ar</sub>), 7.20 (d, <sup>3</sup>J = 8.7 Hz, 2 H, 2 x CH<sub>ar</sub>). MS (EI): m/z = 282 [M], 236 [M – NO<sub>2</sub>], 121 [C<sub>8</sub>H<sub>9</sub>O]. IR (neat):  $\tilde{\nu}$  (cm<sup>-1</sup>) = 3340 (w, O-H), 2930 (w, C-H), 2822 (w, O-CH<sub>3</sub>), 1542 (s, C-NO<sub>2</sub>), 1377 (w, C-NO<sub>2</sub>), 815 (s, Ar), 755/642 (m, Ar). Purity (HPLC): 94.2 %, t<sub>R</sub> = 6.31 min (method CH<sub>3</sub>CN).

#### 2.2.5. (4*aRS*,8*RS*,8*aRS*)-6-Butyl-8-(pyrrolidin-1-yl)-4*a*,5,6,7,8,8*a*-hexahydro-1*H*-pyrido[3,4-*b*][1,4]oxazin-2(3*H*)-one (**15d**)

According to **General Procedure A** Boc-protected pyridooxazines **14** (115 mg, 0.36 mmol) was reacted with trifluoroacetic acid (0.82 mL, 10.6 mmol) in CH<sub>2</sub>Cl<sub>2</sub> (3.5 mL). Then, alkylation was performed with *n*-butanal (32.5 μL, 0.36 mmol), NaBH(OAc)<sub>3</sub> (107 mg, 0.5 mmol) and THF (6 mL). The secondary amine was completely converted after 18 h and the product was purified by fc (∅ = 2 cm, h = 18 cm, CH<sub>2</sub>Cl<sub>2</sub>/CH<sub>3</sub>OH/NH<sub>3</sub> = 9.5/0.47/0.03, V = 10 mL, R<sub>f</sub> = 0.33). Colorless solid, mp 151 – 154 °C, yield 75.2 mg (74 %). C<sub>15</sub>H<sub>27</sub>N<sub>3</sub>O<sub>2</sub> (M = 281.4 g/mol). <sup>1</sup>H NMR (CD<sub>3</sub>OD): δ (ppm) = 0.94 (t, <sup>3</sup>J = 7.3 Hz, 3 H, CH<sub>3</sub>), 1.28 – 1.41 (m, 2 H, CH<sub>2</sub>CH<sub>2</sub>CH<sub>2</sub>CH<sub>3</sub>), 1.42 – 1.59 (m, 2 H, CH<sub>2</sub>CH<sub>2</sub>CH<sub>2</sub>CH<sub>3</sub>), 1.72 – 1.82 (m, 4 H, N(CH<sub>2</sub>CH<sub>2</sub>)<sub>2</sub>), 2.03 (t, <sup>2</sup>J = 10.1 Hz, <sup>3</sup>J = 10.1 Hz, 1 H, 5-CH<sub>2-ax</sub>), 2.09 (dd, <sup>2</sup>J = 12.8 Hz, <sup>3</sup>J = 1.9 Hz, 1 H, 7-CH<sub>2-ax</sub>), 2.32 – 2.47 (m, 2 H, CH<sub>2</sub>CH<sub>2</sub>CH<sub>2</sub>CH<sub>3</sub>), 2.69 – 2.81 (m, 5 H, 8-CH, N(CH<sub>2</sub>CH<sub>2</sub>)<sub>2</sub>), 3.16 – 3.18 (m, 1 H, 5-CH<sub>2-eq</sub>), 3.19 – 3.23

(m, 1 H, 7-CH<sub>2-eq</sub>), 3.38 (dd, <sup>3</sup>J = 9.8 Hz, <sup>3</sup>J = 3.1 Hz, 1 H, 8a-CH), 3.97 – 4.06 (m, 1 H, 4a-CH), 4.16 (s, 2 H, 3-CH<sub>2</sub>). A signal for NH proton is not observed in the <sup>1</sup>H NMR spectrum. <sup>13</sup>C NMR (CD<sub>3</sub>OD): δ (ppm) = 14.3 (CH<sub>3</sub>), 21.8 (CH<sub>2</sub>CH<sub>2</sub>CH<sub>2</sub>CH<sub>3</sub>), 24.1 (2 C, N(CH<sub>2</sub>CH<sub>2</sub>)<sub>2</sub>), 29.9 (CH<sub>2</sub>CH<sub>2</sub>CH<sub>2</sub>CH<sub>3</sub>), 54.2 (2 C, N(CH<sub>2</sub>CH<sub>2</sub>)<sub>2</sub>), 56.3 (C-7), 57.7 (C-5), 59.0 (CH<sub>2</sub>CH<sub>2</sub>CH<sub>2</sub>CH<sub>3</sub>), 60.9 (C-8a), 62.7 (C-8), 68.4 (C-3), 71.4 (C-4a), 171.2 (C=O). MS (EM, APCI): m/z = calcd. for C<sub>15</sub>H<sub>28</sub>N<sub>3</sub>O<sub>2</sub> [M + H] 282.2182, found 282.2154; calcd. for C<sub>11</sub>H<sub>21</sub>N<sub>2</sub>O<sub>2</sub> [(M – pyrrolidine) + 2 H] 213.1603, found 213.1572. IR (neat):  $\tilde{\nu}$  (cm<sup>-1</sup>) = 3197/3066 (w, N-H), 2959/2928/2870 (m, C-H), 1678 (s, C=O).

### 2.2.6. (4aRS,8RS,8aRS)-6-Cyclopentyl-8-(pyrrolidin-1-yl)-4a,5,6,7,8,8a-hexahydro-1H-pyrido[3,4-b][1,4]oxazin-2(3H)-one (15e)

According to **General Procedure A** Boc-protected pyridooxazines **14** (65.0 mg, 0.20 mmol) was reacted with cyclopentanone (18 μL, 0.20 mmol), trifluoroacetic acid (15 μL, 0.20 mmol) and NaBH(OAc)<sub>3</sub> (59.3 mg, 0.28 mmol) in THF (4 mL). After 1 h the amine was completely converted and the product was purified by fc (∅ = 2 cm, h = 18 cm, CH<sub>2</sub>Cl<sub>2</sub>/CH<sub>3</sub>OH/NH<sub>3</sub> = 9.5/0.47/0.03, V = 10 mL, R<sub>f</sub> = 0.24 (CH<sub>2</sub>Cl<sub>2</sub>/CH<sub>3</sub>OH = 9/1)). Colorless solid, mp 168 °C (decomposition), yield 47.8 mg (81 %). C<sub>16</sub>H<sub>27</sub>N<sub>3</sub>O<sub>2</sub> (M = 293.4 g/mol). <sup>1</sup>H NMR (CDCl<sub>3</sub>): δ (ppm) = 1.34 – 1.92 (m, 12 H, CH(CH<sub>2</sub>)<sub>4</sub>, N(CH<sub>2</sub>CH<sub>2</sub>)<sub>2</sub>), 1.95 – 2.05 (m, 2 H, 5-CH<sub>2-ax</sub>, 7-CH<sub>2-ax</sub>), 2.53 – 2.69 (m, 4 H, CH(CH<sub>2</sub>)<sub>4</sub>, 8-CH, N(CH<sub>2</sub>CH<sub>2</sub>)<sub>2</sub>), 2.70 – 2.79 (m, 2 H, N(CH<sub>2</sub>CH<sub>2</sub>)<sub>2</sub>), 3.17 – 3.25 (m, 1 H, 5-CH<sub>2-eq</sub> or 7-CH<sub>2-eq</sub>), 3.28 – 3.33 (m, 1 H, 5-CH<sub>2-eq</sub> or 7-CH<sub>2-eq</sub>), 3.36 (dd, <sup>3</sup>J = 9.7 Hz, <sup>3</sup>J = 3.4 Hz, 1 H, 8a-CH), 3.94 – 4.02 (m, 1 H, 4a-CH), 4.18 (d, <sup>2</sup>J = 16.7 Hz, 1 H, 3-CH<sub>2</sub>), 4.26 (d, <sup>2</sup>J = 16.7 Hz, 1 H, 3-CH<sub>2</sub>), 6.76 (s broad, 1 H, NH). <sup>13</sup>C NMR (CDCl<sub>3</sub>): δ (ppm) = 23.4/24.2/29.8/30.4 (6 C, CH(CH<sub>2</sub>)<sub>4</sub>, N(CH<sub>2</sub>CH<sub>2</sub>)<sub>2</sub>), 53.4 (2 C, N(CH<sub>2</sub>CH<sub>2</sub>)<sub>2</sub>), 54.0 (C-5 or C-7), 55.6 (C-5 or C-7), 59.9 (C-8a), 61.5 (C-8 or CH(CH<sub>2</sub>)<sub>4</sub>), 67.3 (CH(CH<sub>2</sub>)<sub>4</sub> or C-8), 67.9 (C-3), 71.1 (C-4a), 169.1 (C=O). MS (EM, APCI): m/z = calcd. for C<sub>16</sub>H<sub>28</sub>N<sub>3</sub>O<sub>2</sub> [M + H] 294.2182, found 294.2162. IR (neat):  $\tilde{\nu}$  (cm<sup>-1</sup>) = 2959/2901/2866 (m, C-H), 1682 (s, C=O).

### 2.2.7. (4aRS,8RS,8aRS)-6-Benzyl-8-(pyrrolidin-1-yl)-4a,5,6,7,8,8a-hexahydro-1H-pyrido[3,4-b][1,4]oxazin-2(3H)-one (15f)

According to **General Procedure A** Boc-protected pyridooxazines **14** (140 mg, 0.43 mmol) was reacted with trifluoroacetic acid (1.0 mL, 12.9 mmol) in CH<sub>2</sub>Cl<sub>2</sub> (4 mL). The alkylation was performed with benzaldehyde (65.1 μL, 0.65 mmol),

NaBH(OAc)<sub>3</sub> (127.6 mg, 0.6 mmol) and THF (10 mL). The conversion was complete after 3 h and the product was purified by fc ( $\varnothing = 2$  cm,  $h = 16$  cm, CH<sub>2</sub>Cl<sub>2</sub>/CH<sub>3</sub>OH = 9/1,  $V = 10$  mL,  $R_f = 0.30$ ). Colorless solid, mp 191 – 194 °C, yield 121.6 mg (90 %). C<sub>18</sub>H<sub>25</sub>N<sub>3</sub>O<sub>2</sub> (M = 315.4 g/mol). <sup>1</sup>H NMR (CD<sub>3</sub>OD):  $\delta$  (ppm) = 1.77 – 1.85 (m, 4 H, N(CH<sub>2</sub>CH<sub>2</sub>)<sub>2</sub>), 2.14 (t, <sup>2</sup>J = 10.1 Hz, <sup>3</sup>J = 10.1 Hz, 1 H, 5-CH<sub>2-ax</sub>), 2.20 (dd, <sup>2</sup>J = 13.2 Hz, <sup>3</sup>J = 1.9 Hz, 1 H, 7-CH<sub>2-ax</sub>), 2.77 – 2.86 (m, 2 H, N(CH<sub>2</sub>CH<sub>2</sub>)<sub>2</sub>), 2.88 – 2.96 (m, 2 H, N(CH<sub>2</sub>CH<sub>2</sub>)<sub>2</sub>), 2.96 – 3.00 (m, 1 H, 8-CH), 3.06 – 3.12 (m, <sup>2</sup>J = 13.1 Hz, <sup>3</sup>J = 1.8 Hz, 1 H, 7-CH<sub>2-eq</sub>), 3.22 (dd, <sup>2</sup>J = 10.3 Hz, <sup>3</sup>J = 4.7 Hz, 1 H, 5-CH<sub>2-eq</sub>), 3.46 – 3.52 (m, 1 H, 8a-CH), 3.49 (d, <sup>2</sup>J = 12.7 Hz, 1 H, ArCH<sub>2</sub>), 3.69 (d, <sup>2</sup>J = 12.7 Hz, 1 H, ArCH<sub>2</sub>), 4.03 (m, 1 H, 4a-CH), 4.18 (s, 2 H, 3-CH<sub>2</sub>), 7.26 – 7.36 (m, 5 H, Ar). A signal for the NH proton is not observed in the <sup>1</sup>H NMR spectrum. <sup>13</sup>C NMR (CD<sub>3</sub>OD):  $\delta$  (ppm) = 23.8 (2 C, N(CH<sub>2</sub>CH<sub>2</sub>)<sub>2</sub>), 54.6 (2 C, N(CH<sub>2</sub>CH<sub>2</sub>)<sub>2</sub>), 54.8 (C-7), 57.3 (C-5), 60.0 (C-8a), 63.0 (C-8), 63.1 (ArCH<sub>2</sub>), 68.5 (C-3), 71.2 (C-4a), 128.7 (C<sub>ar</sub>), 129.4 (2 C, C<sub>ar</sub>), 130.7 (2 C, C<sub>ar</sub>), 138.6 (C<sub>q</sub>), 171.2 (C=O). MS (EM, APCI):  $m/z = \text{calcd. for C}_{18}\text{H}_{26}\text{N}_3\text{O}_2$  [M + H] 316.2025, found 316.2007. IR (neat):  $\nu$  (cm<sup>-1</sup>) = 3183/3067 (w, N-H), 2954/2905/2774 (m, C-H), 1670 (s, C=O), 737/694 (s, Ar). Purity (HPLC): 98.3 %,  $t_R = 12.89$  min (method CH<sub>3</sub>CN).

### 2.2.8. (4aRS,8RS,8aRS)-6-(Pyridin-3-ylmethyl)-8-(pyrrolidin-1-yl)-4a,5,6,7,8,8a-hexahydro-1H-pyrido[3,4-b][1,4]oxazin-2(3H)-one (15g)

According to **General Procedure A** Boc-protected pyridooxazines **14** (80.4 mg, 0.25 mmol) was reacted with trifluoroacetic acid (0.57 mL, 7.4 mmol) in CH<sub>2</sub>Cl<sub>2</sub> (2.5 mL). Then alkylation was performed with pyridine-3-carbaldehyde (35  $\mu$ L, 0.38 mmol), NaBH(OAc)<sub>3</sub> (74.2 mg, 0.35 mmol) and THF (4 mL). The transformation was complete after 20 h and the product was purified by fc ( $\varnothing = 2$  cm,  $h = 16$  cm, CH<sub>2</sub>Cl<sub>2</sub>/CH<sub>3</sub>OH/NH<sub>3</sub> = 9.2/0.7/0.1,  $V = 10$  mL,  $R_f = 0.48$  (CH<sub>2</sub>Cl<sub>2</sub>/CH<sub>3</sub>OH/NH<sub>3</sub> = 9.5/0.47/0.3)). Pale yellow crystals, mp 78 – 81 °C, yield 75.5 mg (95 %). C<sub>17</sub>H<sub>24</sub>N<sub>4</sub>O<sub>2</sub> (M = 316.4 g/mol). <sup>1</sup>H NMR (CD<sub>3</sub>OD):  $\delta$  (ppm) = 1.66 – 1.76 (m, 4 H, N(CH<sub>2</sub>CH<sub>2</sub>)<sub>2</sub>), 2.10 (t, <sup>2</sup>J = 10.1 Hz, <sup>3</sup>J = 10.1 Hz, 1 H, 5-CH<sub>2-ax</sub>), 2.17 (dd, <sup>2</sup>J = 12.7 Hz, <sup>3</sup>J = 2.1 Hz, 1 H, 7-CH<sub>2-ax</sub>), 2.52 – 2.61 (m, 2 H, N(CH<sub>2</sub>CH<sub>2</sub>)<sub>2</sub>), 2.62 – 2.72 (m, 3 H, N(CH<sub>2</sub>CH<sub>2</sub>)<sub>2</sub>, 8-CH), 3.04 (dt, <sup>2</sup>J = 12.7 Hz, <sup>3</sup>J = 2.0 Hz, 1 H, 7-CH<sub>2-eq</sub>), 3.15 (dd, <sup>2</sup>J = 10.1 Hz, <sup>3</sup>J = 4.6 Hz, 1 H, 5-CH<sub>2-eq</sub>), 3.37 (dd, <sup>3</sup>J = 9.8 Hz, <sup>3</sup>J = 3.2 Hz, 1 H, 8a-CH), 3.54 (d, <sup>2</sup>J = 13.3 Hz, 1 H, PyrCH<sub>2</sub>), 3.68 (d, <sup>2</sup>J = 13.3 Hz, 1 H, PyrCH<sub>2</sub>), 3.99 – 4.08 (m, 1 H, 4a-CH), 4.15 (s, 2 H, 3-CH<sub>2</sub>), 7.42 (dd, <sup>3</sup>J = 7.8 Hz,

$^3J = 4.9$  Hz, 1 H, 5- $CH_{\text{pyr}}$ ), 7.85 (dt,  $^3J = 7.8$  Hz,  $^2J = 1.8$  Hz, 1 H, 6- $CH_{\text{pyr}}$ ), 8.45 (dd,  $^3J = 4.9$  Hz,  $^4J = 1.6$  Hz, 1 H, 4- $CH_{\text{pyr}}$ ), 8.51 (dd,  $^4J = 1.7$  Hz, 1 H, 2- $CH_{\text{pyr}}$ ). A signal for the  $NH$  proton is not observed in the  $^1H$  NMR spectrum.  $^{13}C$  NMR ( $CD_3OD$ ):  $\delta$  (ppm) = 24.1 (2 C,  $N(CH_2CH_2)_2$ ), 54.0 (2 C,  $N(CH_2CH_2)_2$ ), 55.8 (C-7), 57.3 (C-5), 60.2 ( $PyrCH_2$ ), 60.8 (C-8a), 62.4 (C-8), 68.3 (C-3), 71.4 (C-4a), 125.9 ( $C_{\text{pyr-5}}$ ), 135.6 ( $C_q$ ), 139.4 ( $C_{\text{pyr-6}}$ ), 149.1 ( $C_{\text{pyr-4}}$ ), 150.9 ( $C_{\text{pyr-2}}$ ), 171.2 (C=O). MS (EM, APCI):  $m/z = \text{calcd. for } C_{17}H_{25}N_4O_2 [M + H] 317.1978$ , found 317.1955. IR (neat):  $\tilde{\nu}$  ( $cm^{-1}$ ) = 2956/2909/2801 ( $m$ , C-H), 1670 ( $s$ , C=O), 714 ( $s$ , Ar). Purity (HPLC): 98.5 %,  $t_R = 4.49$  min (method  $CH_3CN$ ).

### 2.2.9. 6-Butyl (4a*RS*,8*RS*,8a*RS*)-8-(pyrrolidin-1-yl)-2,3,4a,5,6,7,8,8a-octahydro-1*H*-pyrido[3,4-*b*][1,4]oxazine (16d)

A solution of  $AlH_3$  (1.33 mmol) was freshly prepared by **General Procedure B**. Lactam **15d** (47.9 mg, 0.17 mmol) dissolved in THF (3 mL) was added dropwise at 0 °C. The reaction mixture was stirred for 45 min at 0 °C and for additional 20 min at rt. 2 M NaOH (5 mL) was added carefully at 0 °C.  $CH_2Cl_2$  (5 mL) was added, the layers were separated and the aqueous layer was extracted with  $CH_2Cl_2$  (4 x 5 mL). The combined organic layers were washed with brine, dried ( $Na_2SO_4$ ) and filtered. The solvent was removed under reduced pressure. Yellow oil, yield 54.0 mg (> 99 %).  $C_{15}H_{29}N_3O$  ( $M = 267.4$  g/mol).  $^1H$  NMR ( $CDCl_3$ ):  $\delta$  (ppm) = 0.91 (t,  $^3J = 7.3$  Hz, 3 H,  $CH_3$ ), 1.24 – 1.35 (m, 2 H,  $CH_2CH_2CH_2CH_3$ ), 1.36 – 1.53 (m, 2 H,  $CH_2CH_2CH_2CH_3$ ), 1.61 – 1.80 (m, 5 H,  $N(CH_2CH_2)_2$ ,  $NH$ ), 1.83 (t,  $^2J = 10.1$  Hz,  $^3J = 10.1$  Hz, 1 H, 5- $CH_{2-ax}$ ), 2.00 (dd,  $^2J = 12.5$  Hz,  $^3J = 2.9$  Hz, 1 H, 7- $CH_{2-ax}$ ), 2.20 – 2.29 (m, 1 H,  $CH_2CH_2CH_2CH_3$ ), 2.30 – 2.38 (m, 1 H,  $CH_2CH_2CH_2CH_3$ ), 2.45 (dd,  $^3J = 9.7$  Hz,  $^3J = 4.2$  Hz, 1 H, 8a- $CH$ ), 2.66 – 2.76 (m, 3 H, 8- $CH$ ,  $N(CH_2CH_2)_2$ ), 2.80 – 2.89 (m, 2 H,  $N(CH_2CH_2)_2$ ), 2.90 – 3.06 (m, 3 H, 2- $CH_2$ , 5- $CH_{2-eq}$  or 7- $CH_{2-eq}$ ), 3.09 (m, 1 H, 5- $CH_{2-eq}$  or 7- $CH_{2-eq}$ ), 3.49 – 3.62 (m, 2 H, 3- $CH_2$ ), 3.80 (m, 1 H, 4a- $CH$ ). MS (EM, APCI):  $m/z = \text{calcd. for } C_{15}H_{30}N_3O [M + H] 268.2389$ , found 268.2406. IR (neat):  $\tilde{\nu}$  ( $cm^{-1}$ ) = 2955/2932/2870 ( $m$ , C-H), 1119/1092 ( $s$ , C- $O_{\text{ether}}$ ).



**2.2.10. (4a*RS*,8*RS*,8a*RS*)-6-Benzyl-8-(pyrrolidin-1-yl)-2,3,4a,5,6,7,8,8a-octahydro-1*H*-pyrido[3,4-*b*][1,4]-oxazine (16f)**

A solution of AlH<sub>3</sub> (1.33 mmol) was freshly prepared by **General Procedure B**. Lactam **15f** (57.8 mg, 0.18 mmol) dissolved in THF (3 mL) was added dropwise at 0 °C. The reaction mixture was stirred for 15 min at 0 °C, then 2 M NaOH (5 mL) was added carefully at 0 °C. CH<sub>2</sub>Cl<sub>2</sub> (5 mL) was added, the layers were separated and the aqueous layer was extracted with CH<sub>2</sub>Cl<sub>2</sub> (4 x 5 mL). The combined organic layers were washed with brine, dried (Na<sub>2</sub>SO<sub>4</sub>) and filtered. The solvent was removed under reduced pressure. R<sub>f</sub> = 0.21 (CH<sub>2</sub>Cl<sub>2</sub>/MeOH = 9/1). Colorless oil, yield 53.8 mg (> 99 %). C<sub>18</sub>H<sub>27</sub>N<sub>3</sub>O (M = 301.4 g/mol). <sup>1</sup>H NMR (CD<sub>3</sub>OD): δ (ppm) = 1.65 – 1.74 (m, 4 H, N(CH<sub>2</sub>CH<sub>2</sub>)<sub>2</sub>), 1.81 – 1.90 (m, 2 H, 5-CH<sub>2-ax</sub>, NH), 2.10 (dd, <sup>2</sup>J = 12.7 Hz, <sup>3</sup>J = 3.0 Hz, 1 H, 7-CH<sub>2-ax</sub>), 2.42 (dd, <sup>3</sup>J = 9.9 Hz, <sup>3</sup>J = 4.4 Hz, 1 H, 8a-CH), 2.65 – 2.74 (m, 2 H, N(CH<sub>2</sub>CH<sub>2</sub>)<sub>2</sub>), 2.76 – 2.86 (m, 3 H, N(CH<sub>2</sub>CH<sub>2</sub>)<sub>2</sub>, 8-CH), 2.87 – 2.92 (m, 2 H, 2-CH<sub>2</sub>), 2.92 – 2.95 (m, 1 H, 5-CH<sub>2-eq</sub>), 3.08 (dt, <sup>2</sup>J = 12.7 Hz, <sup>3</sup>J = 2.1 Hz, 1 H, 7-CH<sub>2-eq</sub>), 3.44 (d, <sup>2</sup>J = 12.8 Hz, 1 H, ArCH<sub>2</sub>), 3.49 (d, <sup>2</sup>J = 12.8 Hz, 1 H, ArCH<sub>2</sub>), 3.51 – 3.57 (m, 1 H, 3-CH<sub>2</sub>), 3.58 – 3.65 (m, 1 H, 4a-CH), 3.71 – 3.77 (m, 1 H, 3-CH<sub>2</sub>), 7.21 – 7.33 (m, 5 H, Ar-H). MS (EM, APCI): m/z = calcd. for C<sub>18</sub>H<sub>28</sub>N<sub>3</sub>O [M + H] 302.2232, found 302.2233. IR (neat):  $\tilde{\nu}$  (cm<sup>-1</sup>) = 2959/2909/2870 (m, C-H), 1107/1088 (s, C-O<sub>ether</sub>), 791/698 (s, Ar).

**2.2.11. 2-(3,4-Dichlorophenyl)-1-[(4a*RS*,8*RS*,8a*RS*)-6-ethyl-8-(pyrrolidin-1-yl)-2,3,4a,5,6,7,8,8a-octahydropyrido[3,4-*b*][1,4]oxazin-1-yl]ethanone (17c)**

A solution of AlH<sub>3</sub> (1.33 mmol) was freshly prepared by **General Procedure B**. After cooling to 0 °C a solution of lactam **15c** (53.1 mg, 0.21 mmol) in THF (3 mL) was added dropwise. The reaction mixture was stirred for 45 min at 0 °C and additional 20 min at rt. 2 M NaOH (5 mL) was carefully added at 0 °C. CH<sub>2</sub>Cl<sub>2</sub> (5 mL) was added, the layers were separated and the aqueous layer was extracted with CH<sub>2</sub>Cl<sub>2</sub> (4 x 5 mL). The combined organic layers were washed with brine, dried (Na<sub>2</sub>SO<sub>4</sub>), filtered and the solvent was removed under reduced pressure. The residue (**16c**) was dissolved in CH<sub>2</sub>Cl<sub>2</sub> (5 mL), 2-(3,4-dichlorophenyl)acetyl chloride (39.1 μL, 0.25 mmol) was added and the mixture was stirred for 30 min. Then 2 M NaOH (5 mL) was added and the mixture was stirred vigorously for 30 min. The layers were separated and the aqueous layer was extracted with CH<sub>2</sub>Cl<sub>2</sub> (2 x 5 mL). The combined organic layers were washed with brine, dried (Na<sub>2</sub>SO<sub>4</sub>), filtered and the

solvent was removed under reduced pressure. The product was purified by fc ( $\varnothing = 2$  cm,  $h = 17$  cm,  $\text{CH}_2\text{Cl}_2/\text{CH}_3\text{OH} = 9.7/0.3 \rightarrow \text{CH}_2\text{Cl}_2/\text{CH}_3\text{OH} = 9.5/0.5$ ,  $V = 10$  mL,  $R_f = 0.07$  ( $\text{CH}_2\text{Cl}_2/\text{CH}_3\text{OH} = 9/1$ )). Colorless resin, yield 76.6 mg (86 %).  $\text{C}_{21}\text{H}_{29}\text{Cl}_2\text{N}_3\text{O}_2$  ( $M = 426.4$  g/mol).  $^1\text{H}$  NMR ( $\text{CDCl}_3$ ):  $\delta$  (ppm) = 1.06 (t,  $^3J = 7.2$  Hz, 3 H,  $\text{CH}_3$ ), 1.60 – 1.87 (m, 4 H,  $\text{N}(\text{CH}_2\text{CH}_2)_2$ ), 1.94 (t,  $^2J = 9.9$  Hz,  $^3J = 9.9$  Hz, 1 H, 5- $\text{CH}_{2\text{-ax}}$ ), 2.04 – 2.22 (m, 1 H, 7- $\text{CH}_{2\text{-ax}}$ ), 2.29 – 2.81 (m, 6 H,  $\text{CH}_2\text{CH}_3$ ,  $\text{N}(\text{CH}_2\text{CH}_2)_2$ ), 3.08 (d,  $^2J = 12.8$  Hz, 1 H, 7- $\text{CH}_{2\text{-eq}}$ ), 3.19 (dd,  $^2J = 10.0$  Hz,  $^3J = 2.9$  Hz, 1 H, 5- $\text{CH}_{2\text{-eq}}$ ), 3.48 – 4.08 (m, 8 H, 2- $\text{CH}_2$ , 3- $\text{CH}_2$ , 8- $\text{CH}$ , 8a- $\text{CH}$ ,  $\text{ArCH}_2$ ), 4.28 – 4.73 (m, 1 H, 4a- $\text{CH}$ ), 7.09 (dd,  $^3J = 8.2$  Hz,  $^4J = 2.0$  Hz, 1 H, 6- $\text{CH}_{\text{ar}}$ ), 7.35 (d,  $^4J = 2.0$  Hz, 1 H, 2- $\text{CH}_{\text{ar}}$ ), 7.39 (d,  $^3J = 8.2$  Hz, 1 H, 5- $\text{CH}_{\text{ar}}$ ).  $^{13}\text{C}$  NMR ( $\text{CDCl}_3$ ):  $\delta$  (ppm) = 12.1 ( $\text{CH}_3$ ), 23.4 (2 C,  $\text{N}(\text{CH}_2\text{CH}_2)_2$ ), 40.6 ( $\text{ArCH}_2$ ), 41.2 (C-8a), 51.9 ( $\text{CH}_2\text{CH}_3$ ), 53.6 (2 C,  $\text{N}(\text{CH}_2\text{CH}_2)_2$ ), 55.5 (C-7), 58.2 (C-5), 60.6 (C-8), 64.5 (C-2), 65.8 (C-3), 66.8 (C-4a), 128.6 (C<sub>ar</sub>-6), 130.6 (C<sub>ar</sub>-2), 131.1 (C<sub>ar</sub>-5), 131.4 (C<sub>q</sub>), 132.8 (C<sub>q</sub>), 134.7 (C<sub>q</sub>), 170.5 (C=O). MS (EM, APCI):  $m/z = \text{calcd. for } \text{C}_{21}\text{H}_{30}^{35}\text{Cl}_2\text{N}_3\text{O}_2$  [ $M + \text{H}$ ] 426.1715, found 426.1690. IR (neat):  $\tilde{\nu}$  ( $\text{cm}^{-1}$ ) = 2966/2870/2778 ( $m$ , C-H), 1636 ( $s$ , C=O), 1129/1111 ( $s$ , C-O<sub>ether</sub>). Purity (HPLC): 98.4 %,  $t_R = 17.95$  min (method  $\text{CH}_3\text{CN}$ ).

**2.2.12. 6-Butyl 1-[(4a*RS*,8*RS*,8a*RS*)-8-(pyrrolidin-1-yl)-2,3,4a,5,6,7,8,8a-octahydropyrido[3,4-b][1,4]oxazin-1-yl]-2-(3,4-dichlorophenyl)ethanone (17d)**

2-(3,4-Dichlorophenyl)acetyl chloride (31.7  $\mu\text{L}$ , 0.20 mmol) was added to a solution of amine **16d** (45.1 mg, 0.17 mmol) in  $\text{CH}_2\text{Cl}_2$  (5.5 mL) and the mixture was stirred for 30 min at rt. 2 M NaOH (5.5 mL) was added and the mixture was stirred vigorously for 30 min. The layers were separated and the aqueous layer was extracted with  $\text{CH}_2\text{Cl}_2$  (5 x 5 mL). The combined organic layers were washed with brine, dried ( $\text{Na}_2\text{SO}_4$ ), filtered and the solvent was removed under reduced pressure. The product was purified by fc ( $\varnothing = 2$  cm,  $h = 16$  cm,  $\text{CH}_2\text{Cl}_2/\text{MeOH} = 9.7/0.3$ ,  $V = 10$  mL,  $R_f = 0.65$  ( $\text{CH}_2\text{Cl}_2/\text{MeOH} = 9/1$ )). Yellow oil, yield 71.4 mg (92 %).  $\text{C}_{23}\text{H}_{33}\text{Cl}_2\text{N}_3\text{O}_2$  ( $M = 454.4$  g/mol).  $^1\text{H}$  NMR ( $\text{CDCl}_3$ ):  $\delta$  (ppm) = 0.90 (t,  $^3J = 7.3$  Hz, 3 H,  $\text{CH}_3$ ), 1.20 – 1.34 (m, 2 H,  $\text{CH}_2\text{CH}_2\text{CH}_2\text{CH}_3$ ), 1.37 – 1.53 (m, 2 H,  $\text{CH}_2\text{CH}_2\text{CH}_2\text{CH}_3$ ), 1.60 – 1.79 (m, 4 H,  $\text{N}(\text{CH}_2\text{CH}_2)_2$ ), 1.92 (t,  $^2J = 9.9$  Hz,  $^3J = 9.9$  Hz, 1 H, 5- $\text{CH}_{2\text{-ax}}$ ), 2.04 – 2.13 (m, 1 H, 7- $\text{CH}_{2\text{-ax}}$ ), 2.21 – 2.31 (m, 1 H,  $\text{CH}_2\text{CH}_2\text{CH}_2\text{CH}_3$ ), 2.33 – 2.42 (m, 1 H,  $\text{CH}_2\text{CH}_2\text{CH}_2\text{CH}_3$ ), 2.44 – 2.66 (m, 4 H,  $\text{N}(\text{CH}_2\text{CH}_2)_2$ ), 3.06 (d,  $^2J = 12.9$  Hz, 1 H, 7- $\text{CH}_{2\text{-eq}}$ ), 3.12 – 3.20 (m, 1 H, 5- $\text{CH}_{2\text{-eq}}$ ), 3.63 (d,  $^2J = 15.2$  Hz, 1 H,  $\text{ArCH}_2$ ), 3.55 – 4.02 (m, 7 H, 2- $\text{CH}_2$ , 3- $\text{CH}_2$ , 8- $\text{CH}$ , 8a- $\text{CH}$ ,  $\text{ArCH}_2$ ), 4.35 – 4.51 (m, 1 H, 4a- $\text{CH}$ ), 7.09 (dd,

$^3J = 8.2$  Hz,  $^4J = 2.1$  Hz, 1 H, 6- $CH_{ar}$ ), 7.35 (d,  $^4J = 2.0$  Hz, 1 H, 2- $CH_{ar}$ ), 7.39 (d,  $^3J = 8.2$  Hz, 1 H, 5- $CH_{ar}$ ).  $^{13}C$  NMR ( $CDCl_3$ ):  $\delta$  (ppm) = 14.2 ( $CH_3$ ), 20.8 ( $CH_2CH_2CH_2CH_3$ ), 23.4 (2 C,  $N(CH_2CH_2)_2$ ), 29.2 ( $CH_2CH_2CH_2CH_3$ ), 40.6 ( $ArCH_2$ ), 41.5 (C-8a), 53.3 (2 C,  $N(CH_2CH_2)_2$ ), 56.1 (C-7), 58.2 ( $CH_2CH_2CH_2CH_3$ ), 58.7 (C-5), 60.3 (C-8), 64.9 (C-2), 65.8 (C-3), 66.8 (C-4a), 128.6 ( $C_{ar-6}$ ), 130.6 ( $C_{ar-5}$ ), 131.1 ( $C_{ar-2}$ ), 131.3 ( $C_q$ ), 132.8 ( $C_q$ ), 134.8 ( $C_q$ ), 170.2 (C=O). MS (EM, APCI):  $m/z$  = calcd. for  $C_{23}H_{34}^{35}Cl_2N_3O_2$  [ $M + H$ ] 454.2028, found 454.2028; calcd. for  $C_{15}H_{30}N_3O$  [ $M - (3,4\text{-dichlorophenyl)acetyl} + 2 H$ ] 268.2389, found 268.2366. IR (neat):  $\tilde{\nu}$  ( $cm^{-1}$ ) = 2955/2928/2870 ( $m$ , C-H), 1640 ( $s$ , C=O), 1131/1111 ( $s$ , C-O<sub>ether</sub>). Purity (HPLC): 99.1 %,  $t_R = 20.0$  min (method  $CH_3CN$ ).

### 2.2.13. 1-[(4aRS,8RS,8aRS)-6-Cyclopentyl-8-(pyrrolidin-1-yl)-2,3,4a,5,6,7,8,8a-octahydropyrido[3,4-b][1,4]oxazin-1-yl]-2-(3,4-dichlorophenyl)-ethanone (17e)

A solution of  $AlH_3$  (1.33 mmol) was freshly prepared by **General Procedure B**. After cooling down to 0 °C a solution of lactam **15e** (50.3 mg, 0.18 mmol) in THF (3 mL) was added dropwise. The reaction mixture was stirred for 45 min at 0 °C and additional 20 min at rt. The transformation was stopped carefully with 2 M NaOH (5 mL) at 0 °C.  $CH_2Cl_2$  (5 mL) was added, the layers were separated and the aqueous layer was extracted with  $CH_2Cl_2$  (4 x 5 mL). The combined organic layers were washed with brine, dried ( $Na_2SO_4$ ) and filtered. The solvent was removed under reduced pressure. The residue (**16e**) was dissolved in  $CH_2Cl_2$  (5 mL), 2-(3,4-dichlorophenyl)acetyl chloride (33.5  $\mu$ L, 0.22 mmol) was added and the mixture was stirred for 30 min. Then 2 M NaOH (5 mL) was added and the mixture was stirred vigorously for 30 min. The layers were separated and the aqueous layer was extracted with  $CH_2Cl_2$  (2 x 5 mL). The combined organic layers were washed with brine, dried ( $Na_2SO_4$ ), filtered and the solvent was removed under reduced pressure. The product was purified by fc ( $\varnothing = 2$  cm,  $h = 17$  cm,  $CH_2Cl_2/CH_3OH = 9.7/0.3$ ,  $V = 10$  mL,  $R_f = 0.10$  ( $CH_2Cl_2/CH_3OH = 9/1$ )). Pale yellow solid, mp 89 – 92 °C, yield 64.7 mg (77 %).  $C_{24}H_{33}Cl_2N_3O_2$  ( $M = 466.4$  g/mol).  $^1H$  NMR ( $CDCl_3$ ):  $\delta$  (ppm) = 1.29 – 1.86 ( $m$ , 12 H,  $CH(CH_2)_4$ ,  $N(CH_2CH_2)_2$ ), 1.90 ( $t$ ,  $^2J = 9.9$  Hz,  $^3J = 9.9$  Hz, 1 H, 5- $CH_{2-ax}$ ), 2.09 – 2.22 ( $m$ , 1 H, 7- $CH_{2-ax}$ ), 2.42 – 2.81 ( $m$ , 5 H,  $CH(CH_2)_4$ ,  $N(CH_2CH_2)_2$ ), 3.13 ( $d$ ,  $^2J = 9.8$  Hz, 1 H, 7- $CH_{2-eq}$ ), 3.27 ( $dd$ ,  $^2J = 9.8$  Hz,  $^3J = 2.7$  Hz, 1 H, 5- $CH_{2-eq}$ ), 3.56 ( $d$ ,  $^2J = 15.2$  Hz, 1 H,  $ArCH_2$ ), 3.51 – 4.09 ( $m$ , 7 H, 2- $CH_2$ , 3- $CH_2$ , 8- $CH$ , 8a- $CH$ ,  $ArCH_2$ ), 4.38 – 4.57 ( $m$ , 1 H, 4a- $CH$ ), 7.09 ( $dd$ ,  $^3J = 8.2$  Hz,  $^4J = 2.0$  Hz, 1 H, 6- $CH_{ar}$ ),

7.35 (d,  $^4J = 2.0$  Hz, 1 H, 2- $CH_{ar}$ ), 7.38 (d,  $^3J = 8.2$  Hz, 1 H, 5- $CH_{ar}$ ).  $^{13}C$  NMR ( $CDCl_3$ ):  $\delta$  (ppm) = 23.4/24.1/29.9/30.4 (6 C,  $N(CH_2CH_2)_2$ ,  $CH(CH_2)_4$ ), 40.6 ( $ArCH_2$ ), 41.5 (C-8a), 53.6 (2 C,  $N(CH_2CH_2)_2$ ), 55.0 (C-7), 57.2 (C-5), 60.6 (C-8), 64.6 (C-2), 65.8 (C-3), 66.6 (C-4a), 67.2 ( $CH(CH_2)_4$ ), 128.6 ( $C_{ar-6}$ ), 130.7 ( $C_{ar-2}$ ), 131.1 ( $C_{ar-5}$ ), 131.4 ( $C_q$ ), 132.8 ( $C_q$ ), 134.7 ( $C_q$ ), 170.5 (C=O). MS (EM, APCI):  $m/z = \text{calcd. for } C_{24}H_{34}^{35}Cl_2N_3O_2$  [M + H] 466.2028, found 466.1986. IR (neat):  $\tilde{\nu}$  ( $cm^{-1}$ ) = 2951/2866/2781 (m, C-H), 1640 (s, C=O), 1132/1115 (s, C-O<sub>ether</sub>). Purity (HPLC): 95.1 %,  $t_R = 19.40$  min (method  $CH_3CN$ ).

**2.2.14. 2-(3,4-Dichlorophenyl)-1-[(4aRS,8RS,8aRS)-6-(pyridin-3-ylmethyl)-8-(pyrrolidin-1-yl)-2,3,4a,5,6,7,8,8a-octahydropyrido[3,4-b][1,4]oxazin-1-yl]-ethanone (17g)**

A solution of  $AlH_3$  (1.33 mmol) was freshly prepared by **General Procedure B**. Lactam **15g** (28.2 mg, 0.09 mmol) dissolved in THF (2 mL) was added dropwise at  $-5$  °C and the mixture was stirred for 15 min. 2 M NaOH (5 mL) was added carefully at  $-5$  °C.  $CH_2Cl_2$  (5 mL) was added, the layers were separated and the aqueous layer was extracted with  $CH_2Cl_2$  (4 x 5 mL). The combined organic layers were washed with brine, dried ( $Na_2SO_4$ ), filtered and the solvent was removed under reduced pressure. The residue (**16g**) was dissolved in  $CH_2Cl_2$  (3 mL), 2-(3,4-dichlorophenyl)acetyl chloride (16.7  $\mu$ L, 0.11 mmol) was added and the mixture was stirred for 15 min at rt. Then 2 M NaOH (3 mL) was added and the mixture was stirred vigorously for 30 min. The layers were separated and the aqueous layer was extracted with  $CH_2Cl_2$  (2 x 5 mL). The combined organic layers were washed with brine, dried ( $Na_2SO_4$ ), filtered and the solvent was removed under reduced pressure. The product was purified by fc ( $\varnothing = 2$  cm,  $h = 17$  cm,  $CH_2Cl_2/CH_3OH/NH_3 = 9.5/0.47/0.03$ ,  $V = 10$  mL,  $R_f = 0.50$ ). Colorless solid, mp 140 °C (decomposition), yield 16.8 mg (38 %).  $C_{25}H_{30}Cl_2N_4O_2$  (M = 489.4 g/mol).  $^1H$  NMR ( $CDCl_3$ ):  $\delta$  (ppm) = 1.49 – 1.71 (m, 4 H,  $N(CH_2CH_2)_2$ ), 1.97 (t,  $^2J = 9.8$  Hz,  $^3J = 9.8$  Hz, 1 H, 5- $CH_{2-ax}$ ), 2.22 (dd,  $^2J = 12.8$  Hz,  $^3J = 1.2$  Hz, 1 H, 7- $CH_{2-ax}$ ), 2.37 – 2.54 (m, 4 H,  $N(CH_2CH_2)_2$ ), 2.95 (d,  $^2J = 12.8$  Hz, 1 H, 7- $CH_{2-eq}$ ), 3.12 (dd,  $^2J = 10.0$  Hz,  $^3J = 2.9$  Hz, 1 H, 5- $CH_{2-eq}$ ), 3.15 – 3.28 (m, 1 H, 8-CH), 3.45 (d,  $^2J = 13.1$  Hz, 1 H, Pyr $CH_2$ ), 3.54 (d,  $^2J = 13.1$  Hz, 1 H, Pyr $CH_2$ ), 3.62 (d,  $^2J = 15.3$  Hz, 1 H,  $ArCH_2$ ), 3.67 (d,  $^2J = 15.4$  Hz, 1 H,  $ArCH_2$ ), 3.57 – 4.01 (m, 5 H, 2- $CH_2$ , 3- $CH_2$ , 8a-CH), 4.33 – 4.48 (m, 1 H, 4a-CH), 7.08 (dd, 1 H,  $^3J = 8.2$  Hz,  $^4J = 1.7$  Hz, 6- $CH_{ar}$ ),

7.22 – 7.27 (m, 1 H, 2- $CH_{\text{pyr}}$ ), 7.34 (d, 1 H,  $^4J = 1.6$  Hz, 2- $CH_{\text{ar}}$ ), 7.38 (d, 1 H,  $^3J = 8.2$  Hz, 5- $CH_{\text{ar}}$ ), 7.60 – 7.67 (m, 1 H,  $CH_{\text{pyr}}$ ), 8.48 – 8.57 (m, 2 H,  $NCH_{\text{pyr}}$ ).  $^{13}\text{C}$  NMR ( $\text{CDCl}_3$ ):  $\delta$  (ppm) = 23.4 (2 C,  $\text{N}(\text{CH}_2\text{CH}_2)_2$ ), 40.5 ( $\text{ArCH}_2$ ), 40.6 (C-8a), 53.1 (2 C,  $\text{N}(\text{CH}_2\text{CH}_2)_2$ ), 55.2 (C-7), 57.9 (C-5), 59.7 (C-8), 60.1 ( $\text{PyrCH}_2$ ), 64.7 (C-2), 65.8 (C-3), 66.6 (C-4a), 123.4 ( $C_{\text{pyr}}$ ), 128.5 ( $C_{\text{ar-6}}$ ), 130.7 ( $C_{\text{ar-5}}$ ), 131.1 ( $C_{\text{ar-2}}$ ), 131.3 ( $C_{\text{q}}$ ), 132.8 ( $C_{\text{q}}$ ), 133.2 ( $C_{\text{q}}$ ), 134.8 ( $C_{\text{q}}$ ), 137.1 ( $C_{\text{pyr}}$ ), 149.1 ( $\text{NC}_{\text{pyr}}$ ), 150.8 ( $\text{NC}_{\text{pyr}}$ ), 170.1 (C=O). MS (EM, APCI):  $m/z = \text{calcd. for } \text{C}_{25}\text{H}_{31}^{35}\text{Cl}_2\text{N}_4\text{O}_2$  [ $\text{M} + \text{H}$ ] 489.1824, found 489.1826. IR (neat):  $\tilde{\nu}$  ( $\text{cm}^{-1}$ ) = 2916/2866/2776 (m, C-H), 1628 (s, C=O), 1126/1111 (s, C-O<sub>ether</sub>), 713/679 (m, Ar). Purity (HPLC): 94.9 %,  $t_{\text{R}} = 16.01$  min (method  $\text{CH}_3\text{CN}$ ).

**2.2.15. 2-(3,4-Dichlorophenyl)-1-[(4aRS,8RS,8aRS)-6-(3,4-dichlorophenylacetyl)-8-(pyrrolidin-1-yl)-2,3,4a,5,6,7,8,8a-octahydropyrido[3,4-b][1,4]oxazin-1-yl]-ethanone (17h)**

A solution of  $\text{AlH}_3$  (1.33 mmol) was freshly prepared by **General Procedure B**. Amide **15g** (92.7 mg, 0.29 mmol) dissolved in THF (5.5 mL) was added dropwise at 0 °C. The reaction mixture was stirred for 45 min at 0 °C and for additional 20 min at rt. The transformation was stopped carefully with 2 M NaOH (5 mL) at 0 °C.  $\text{CH}_2\text{Cl}_2$  (5 mL) was added, the layers were separated and the aqueous layer was extracted with  $\text{CH}_2\text{Cl}_2$  (4 x 5 mL). The combined organic layers were washed with brine, dried ( $\text{Na}_2\text{SO}_4$ ) and filtered. The solvent was removed under reduced pressure. The residue (**16a**) was dissolved in  $\text{CH}_2\text{Cl}_2$  (9 mL), 2-(3,4-dichlorophenyl)acetyl chloride (54.5  $\mu\text{L}$ , 0.35 mmol) was added and the mixture was stirred for 30 min. Then 2 M NaOH (5 mL) was added and the mixture was stirred vigorously for 12 h. The layers were separated and the aqueous layer was extracted with  $\text{CH}_2\text{Cl}_2$  (2 x 5 mL). The combined organic layers were washed with brine, dried ( $\text{Na}_2\text{SO}_4$ ), filtered and the solvent was removed under reduced pressure. The product was purified by fc ( $\varnothing = 3$  cm,  $h = 17$  cm,  $\text{CH}_2\text{Cl}_2/\text{CH}_3\text{OH} = 9.8/0.2$ ,  $V = 10$  mL,  $R_{\text{f}} = 0.43$ ). Yellow resin, yield 34.4 mg (20 %).  $\text{C}_{27}\text{H}_{29}\text{Cl}_4\text{N}_3\text{O}_3$  ( $M = 585.4$  g/mol).  $^1\text{H}$  NMR ( $\text{CDCl}_3$ ):  $\delta$  (ppm) = 1.51 – 1.76 (m, 4 H,  $\text{N}(\text{CH}_2\text{CH}_2)_2$ ), 2.40 – 2.61 (m, 4 H,  $\text{N}(\text{CH}_2\text{CH}_2)_2$ ), 2.73 (d,  $^2J = 14.3$  Hz, 1 H, 7- $\text{CH}_{2\text{-ax}}$ ), 2.80 – 2.89 (m, 1 H, 5- $\text{CH}_{2\text{-ax}}$ ), 3.21 – 3.38 (m, 1 H, 8- $\text{CH}$ ), 3.42 – 4.03 (m, 10 H, 2- $\text{CH}_2$ , 3- $\text{CH}_2$ , 5- $\text{CH}_{2\text{-eq}}$ , 8a- $\text{CH}$ , 2 x  $\text{ArCH}_2$ ), 4.06 – 4.23 (m, 1 H, 4a- $\text{CH}$ ), 4.84 – 4.75 (d,  $^2J = 14.4$  Hz, 1 H, 7- $\text{CH}_{2\text{-eq}}$ ), 7.03 – 7.11 (m, 2 H, 2 x 6- $\text{CH}_{\text{ar}}$ ), 7.30 – 7.44 (m, 4 H, 2 x 2- $\text{CH}_{\text{ar}}$ , 2 x 5- $\text{CH}_{\text{ar}}$ ).  $^{13}\text{C}$  NMR ( $\text{CDCl}_3$ ):

$\delta$  (ppm) = 23.5 (2 C, N(CH<sub>2</sub>CH<sub>2</sub>)<sub>2</sub>), 40.2 (ArCH<sub>2</sub>), 40.8 (ArCH<sub>2</sub>), 41.4 (C-8a), 45.3 (C-7), 50.6 (C-5), 53.6 (2 C, N(CH<sub>2</sub>CH<sub>2</sub>)<sub>2</sub>), 59.5 (C-8), 64.3 (C-2), 65.3 (C-4a), 65.7 (C-3), 128.4 (6-C<sub>ar</sub>), 128.5 (6'-C<sub>ar</sub>), 130.7 (C<sub>ar</sub>), 130.8 (C<sub>ar</sub>), 131.0 (2 C, 2 x C<sub>ar</sub>), 131.3 (C<sub>q</sub>), 131.5 (C<sub>q</sub>), 132.8 (C<sub>q</sub>), 132.9 (C<sub>q</sub>), 134.4 (C<sub>q</sub>), 135.1 (C<sub>q</sub>), 168.7 (C=O), 170.4 (C=O). MS (EM, APCI):  $m/z$  = calcd. for C<sub>27</sub>H<sub>30</sub><sup>35</sup>Cl<sub>4</sub>N<sub>3</sub>O<sub>3</sub> [M + H] 584.1041, found 584.1002. IR (neat):  $\tilde{\nu}$  (cm<sup>-1</sup>) = 2924/2874 (w, C-H), 1640 (s, C=O), 733/678 (m, Ar). Purity (HPLC): 95.1 %,  $t_R$  = 22.23 min (method CH<sub>3</sub>CN).

**2.2.16. (4aRS,8RS,8aRS)-6-[2-(3,4-Dichlorophenyl)acetyl]-8-(pyrrolidin-1-yl)-4a,5,6,7,8,8a-hexahydro-1H-pyrido[3,4-b][1,4]oxazin-2(3H)-one (18)**

Trifluoroacetic acid (31  $\mu$ L, 0.41 mmol) was added to a solution of Boc-protected pyridooxazines **14** (26.6 mg, 0.08 mmol) in CH<sub>2</sub>Cl<sub>2</sub> (2 mL) and the mixture was stirred for 4 h at rt. After evaporation of the solvent in vacuum, the residue (**15a**) was dissolved in CH<sub>2</sub>Cl<sub>2</sub> (2.5 mL) and 2-(3,4-dichlorophenyl)acetyl chloride (15.3  $\mu$ L, 0.10 mmol) was added. The mixture was stirred for 30 min, then 2 M NaOH (2.5 mL) was added and the mixture was stirred for additional 20 min. The layers were separated and the aqueous layer was extracted with CH<sub>2</sub>Cl<sub>2</sub> (2 x 3 mL). The combined organic layers were dried (Na<sub>2</sub>SO<sub>4</sub>) and filtered. The filtrate was concentrated under reduced pressure and the product was purified by fc ( $\varnothing$  = 2 cm, h = 18 cm, CH<sub>2</sub>Cl<sub>2</sub>/CH<sub>3</sub>OH = 9.8/0.2  $\rightarrow$  CH<sub>2</sub>Cl<sub>2</sub>/CH<sub>3</sub>OH = 9.5/0.5, V = 10 mL), colorless oil, yield 28.5 mg. Since the product contained not converted carbamate **14** (~ 6 %, determined by <sup>1</sup>H NMR-spectroscopy), the mixture was dissolved in CH<sub>2</sub>Cl<sub>2</sub> (2 mL) and trifluoroacetic acid (60  $\mu$ L, 0.78 mmol) was added. After stirring for 16 h at rt the pH value of the solution was adjusted to pH 7 by addition of a saturated solution of NaHCO<sub>3</sub> and the solvent was removed under reduced pressure. The product was purified by fc ( $\varnothing$  = 1 cm, h = 16 cm, CH<sub>2</sub>Cl<sub>2</sub>/CH<sub>3</sub>OH = 9.5/0.5, V = 5 mL, R<sub>f</sub> = 0.58 (CH<sub>2</sub>Cl<sub>2</sub>/CH<sub>3</sub>OH = 9/1)). Colorless crystals, mp 181 °C (decomposition), yield 23 mg (68 %). C<sub>19</sub>H<sub>23</sub>Cl<sub>2</sub>N<sub>3</sub>O<sub>3</sub> (M = 412.3 g/mol). <sup>1</sup>H NMR (CD<sub>3</sub>OD):  $\delta$  (ppm) = 1.69 – 1.75 (m, 4 H, N(CH<sub>2</sub>CH<sub>2</sub>)<sub>2</sub>), 2.56 – 2.85 (m, 6 H, N(CH<sub>2</sub>CH<sub>2</sub>)<sub>2</sub>, 7-CH<sub>2</sub>, 8-CH), 3.05 (dd, <sup>2</sup>J = 12.9 Hz, <sup>3</sup>J = 10.3 Hz, 1 H, 5-CH<sub>2</sub>), 3.63 (dd, <sup>3</sup>J = 9.9 Hz, <sup>3</sup>J = 2.6 Hz, 1 H, 8a-CH), 3.72 – 3.78 (m, 1 H, 4a-CH), 3.77 (d, <sup>2</sup>J = 15.7 Hz, 1 H, ArCH<sub>2</sub>), 3.96 (d, <sup>2</sup>J = 15.7 Hz, 1 H, ArCH<sub>2</sub>), 4.06 (d, <sup>2</sup>J = 16.7 Hz, 1 H, 3-CH<sub>2</sub>), 4.14 – 4.22 (m, 1 H, 5-CH<sub>2</sub>), 4.17 (d, <sup>2</sup>J = 16.7 Hz, 1 H, 3-CH<sub>2</sub>), 4.60 (s, 1 H, NH), 4.82 – 4.94 (m, 1 H, 7-CH<sub>2</sub>), 7.22 (dd, <sup>3</sup>J = 8.3 Hz, <sup>4</sup>J = 2.1 Hz, 1 H, 6-CH<sub>ar</sub>), 7.45 (d, <sup>4</sup>J = 2.1 Hz, 1 H, 2-

$CH_{ar}$ ), 7.47 (d,  $^3J = 8.4$  Hz, 1 H,  $CH_{ar}$ ).  $^{13}C$  NMR ( $CD_3OD$ ):  $\delta$  (ppm) = 24.1 (2 C,  $N(CH_2CH_2)_2$ ), 40.4 ( $ArCH_2$ ), 45.9 (C-7), 50.1 (C-5), 54.4 (2 C,  $N(CH_2CH_2)_2$ ), 60.8 (C-8a), 62.3 (C-8), 68.1 (C-3), 70.1 (C-4a), 130.1 ( $C_{ar}$ ), 131.6 ( $C_{ar}$ ), 131.8 ( $C_q$ ), 132.0 ( $C_{ar}$ ), 133.3 ( $C_q$ ), 137.3 ( $C_q$ ), 170.6 (C=O), 171.8 (C=O). MS (EM, APCI):  $m/z = \text{calcd. for } C_{19}H_{24}^{35}Cl_2N_3O_3 [M + H] 412.1195, \text{ found } 412.1159.$  IR (neat):  $\tilde{\nu}$  ( $cm^{-1}$ ) = 2951/2920/2793 (w, C-H), 1678 (s, C=O), 1643 (s, C=O). Purity (HPLC): 98.7 %,  $t_R = 15.93$  min (method  $CH_3CN$ ).

## 3. NMR Spectra

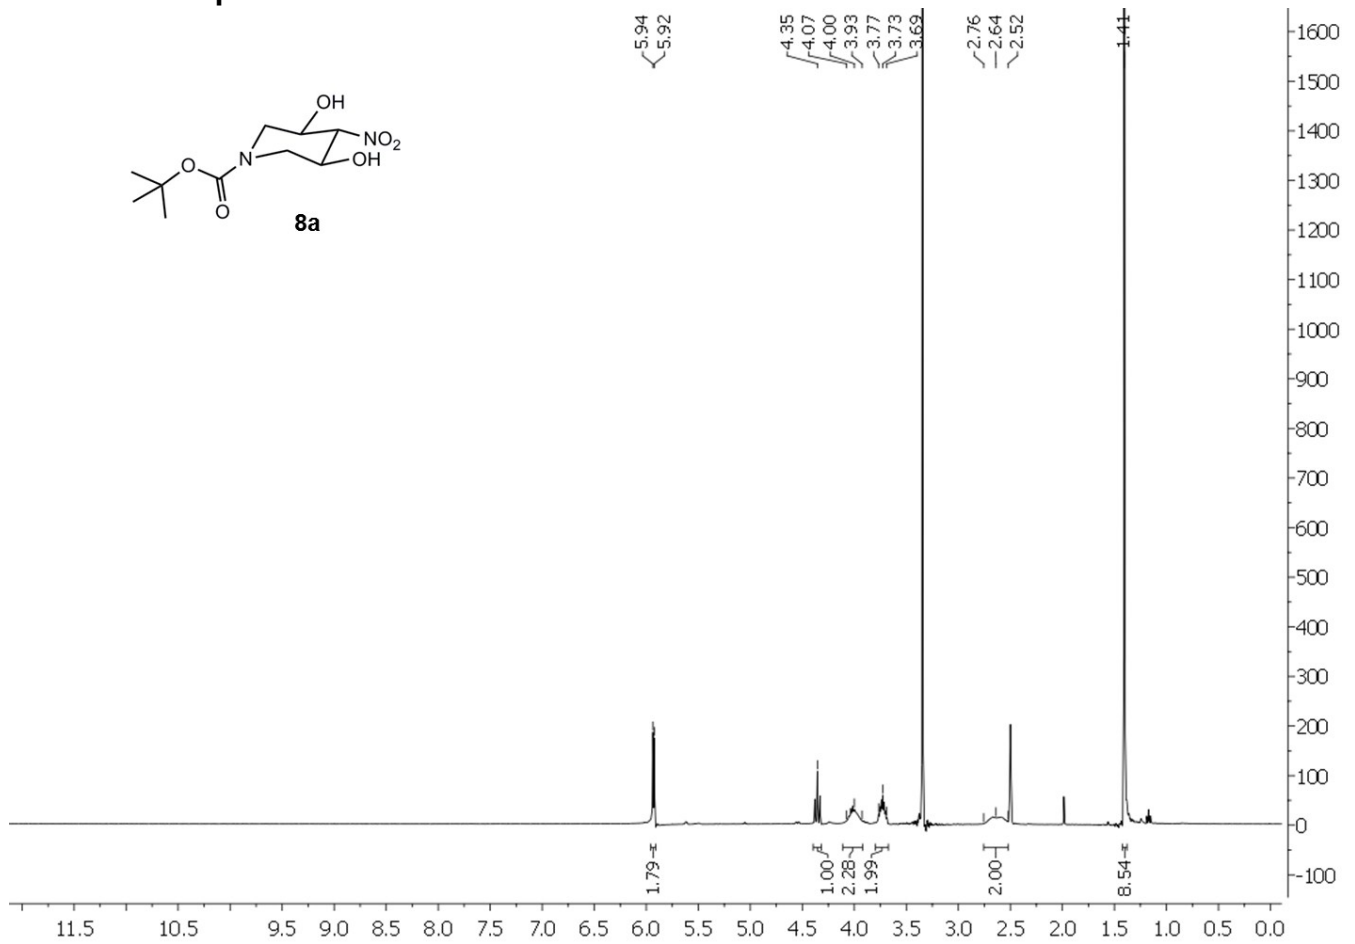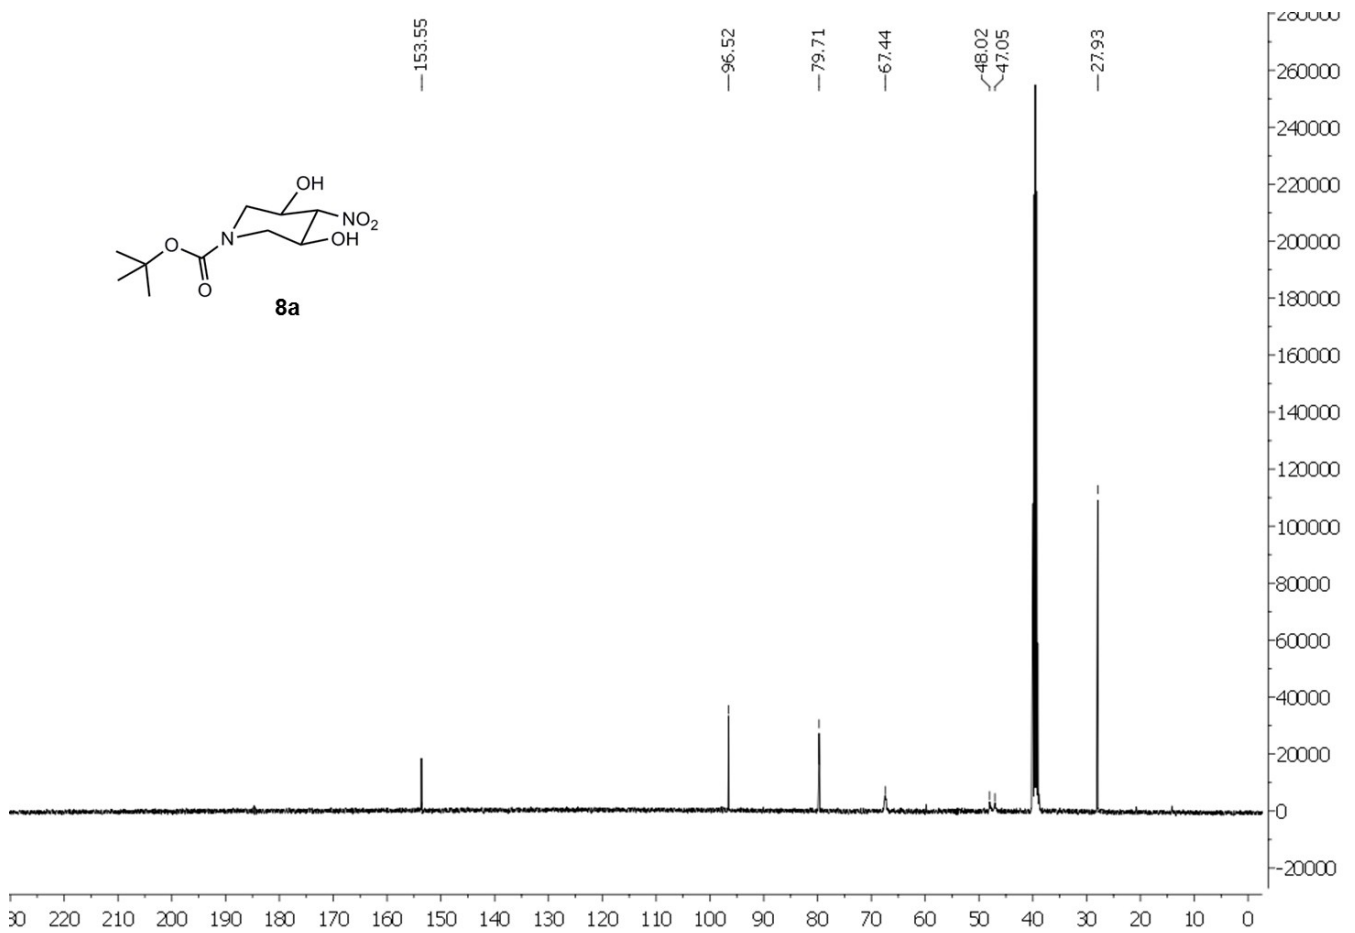



SI17

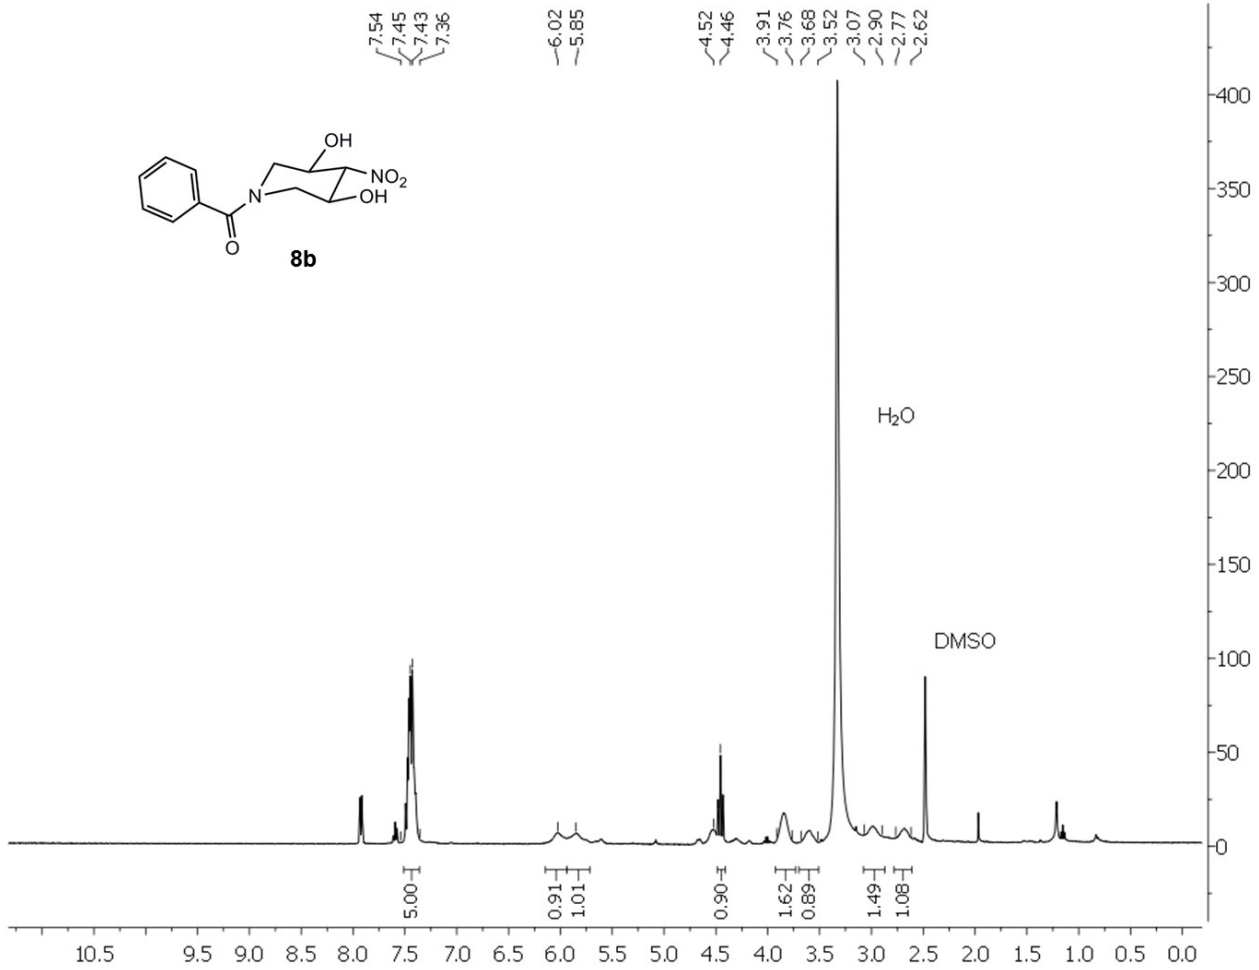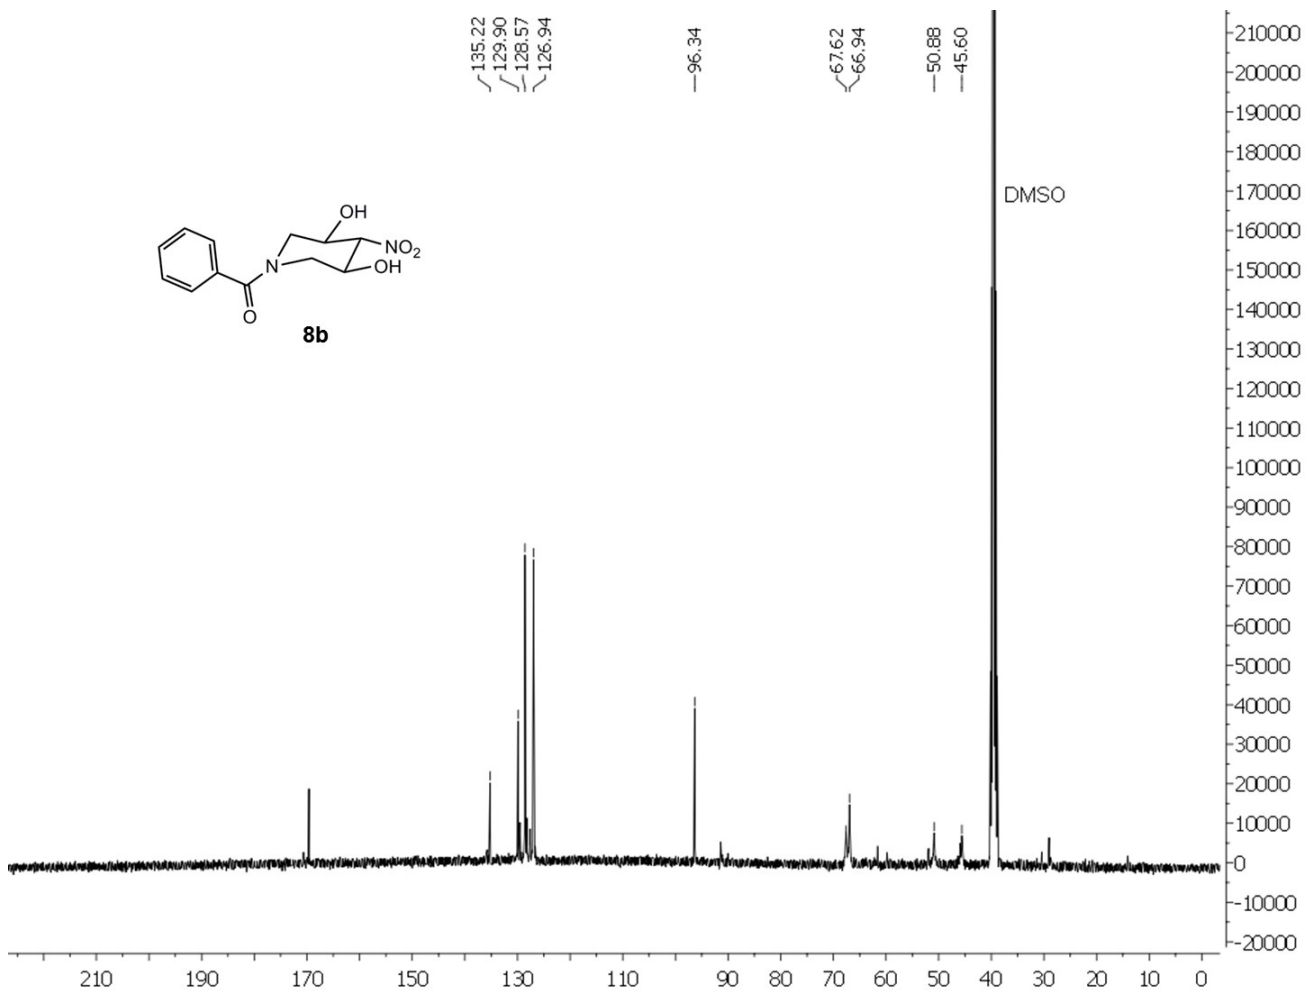

SI18

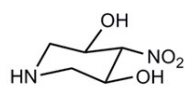

8c

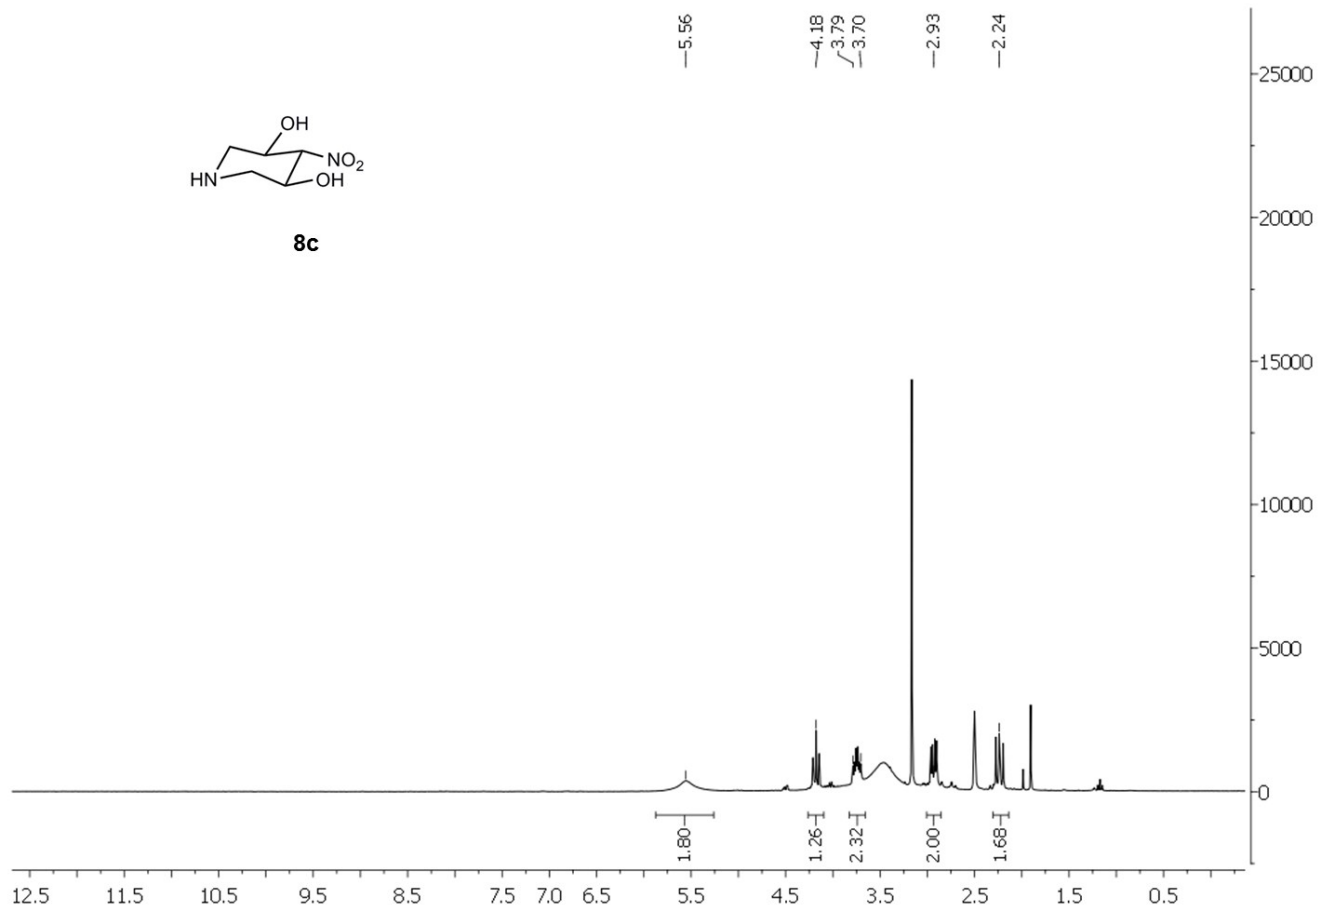

SI19

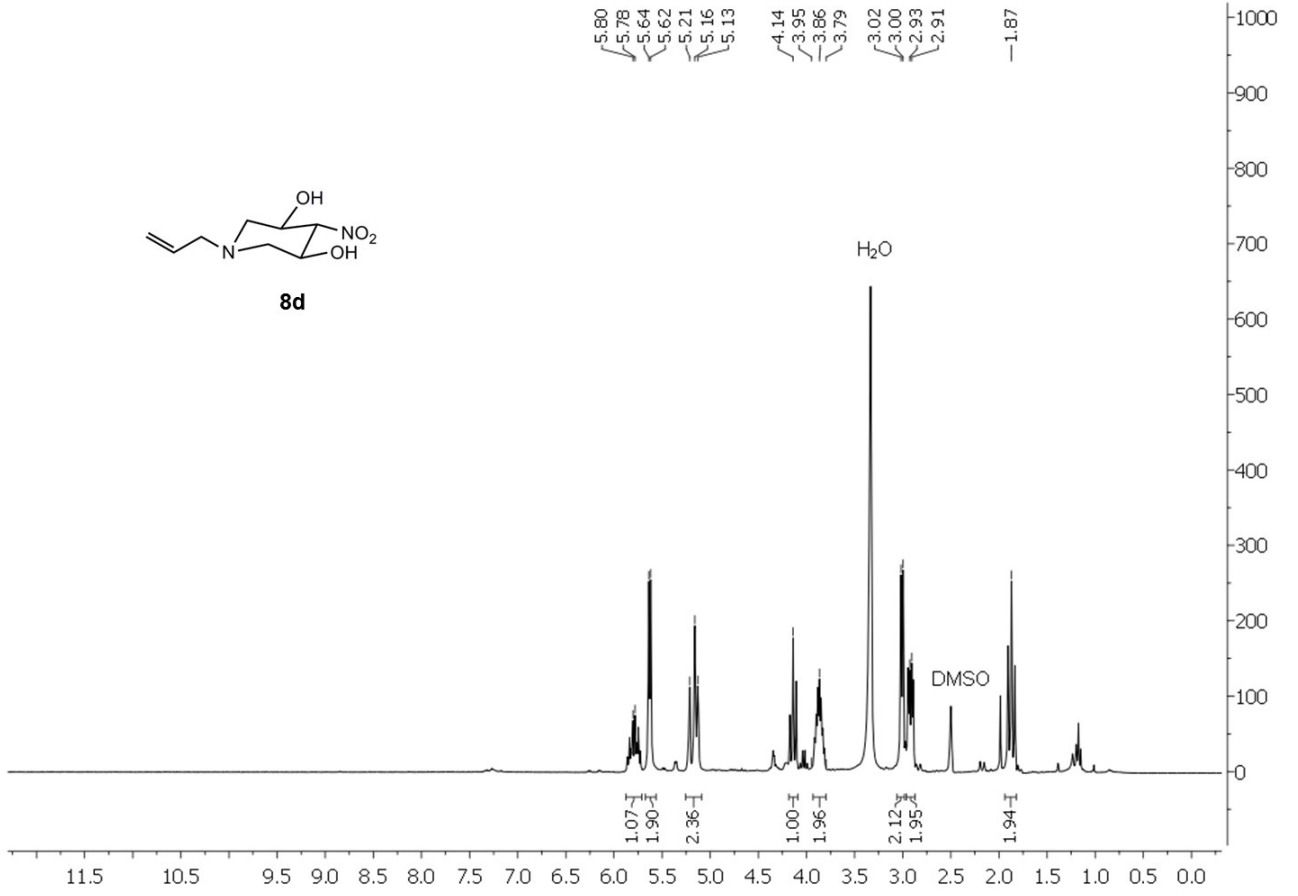

SI20

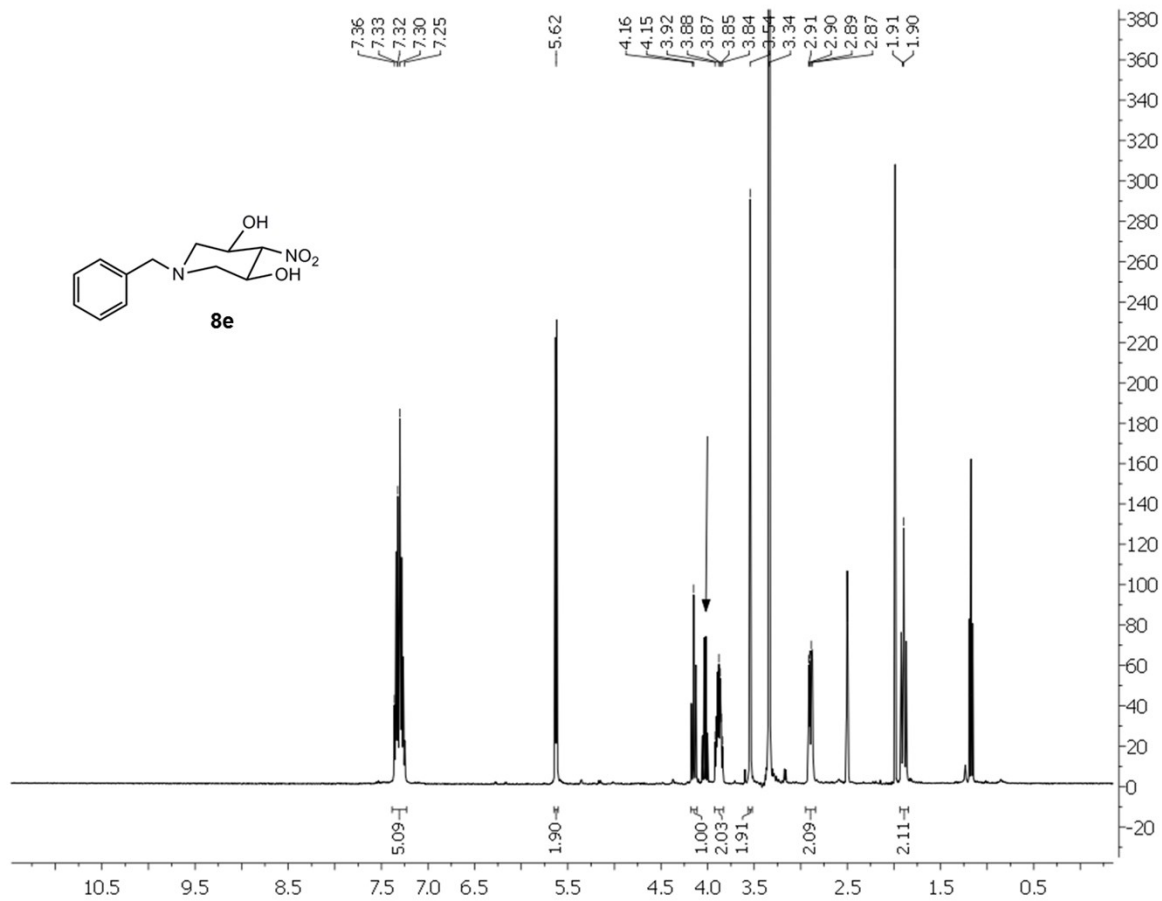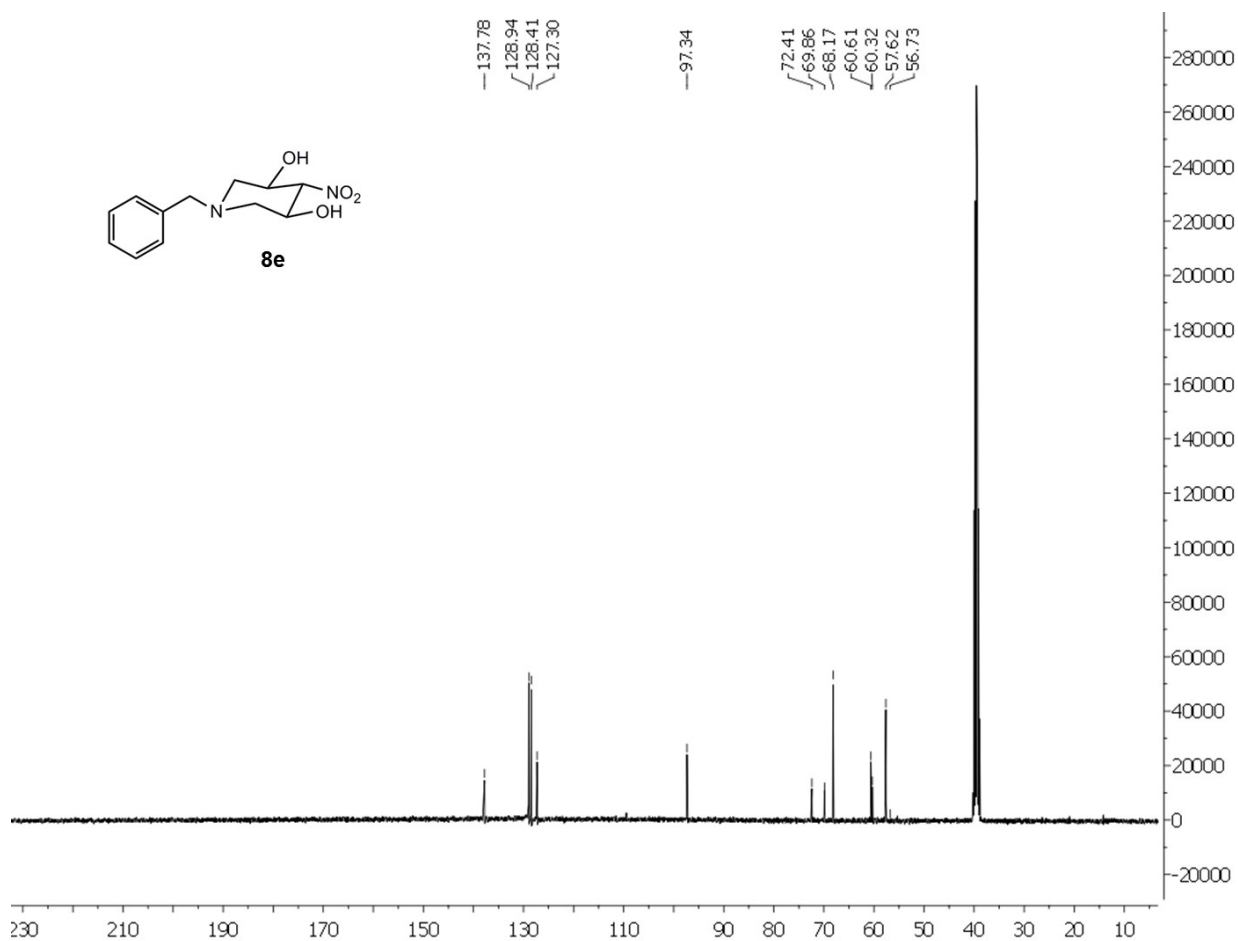



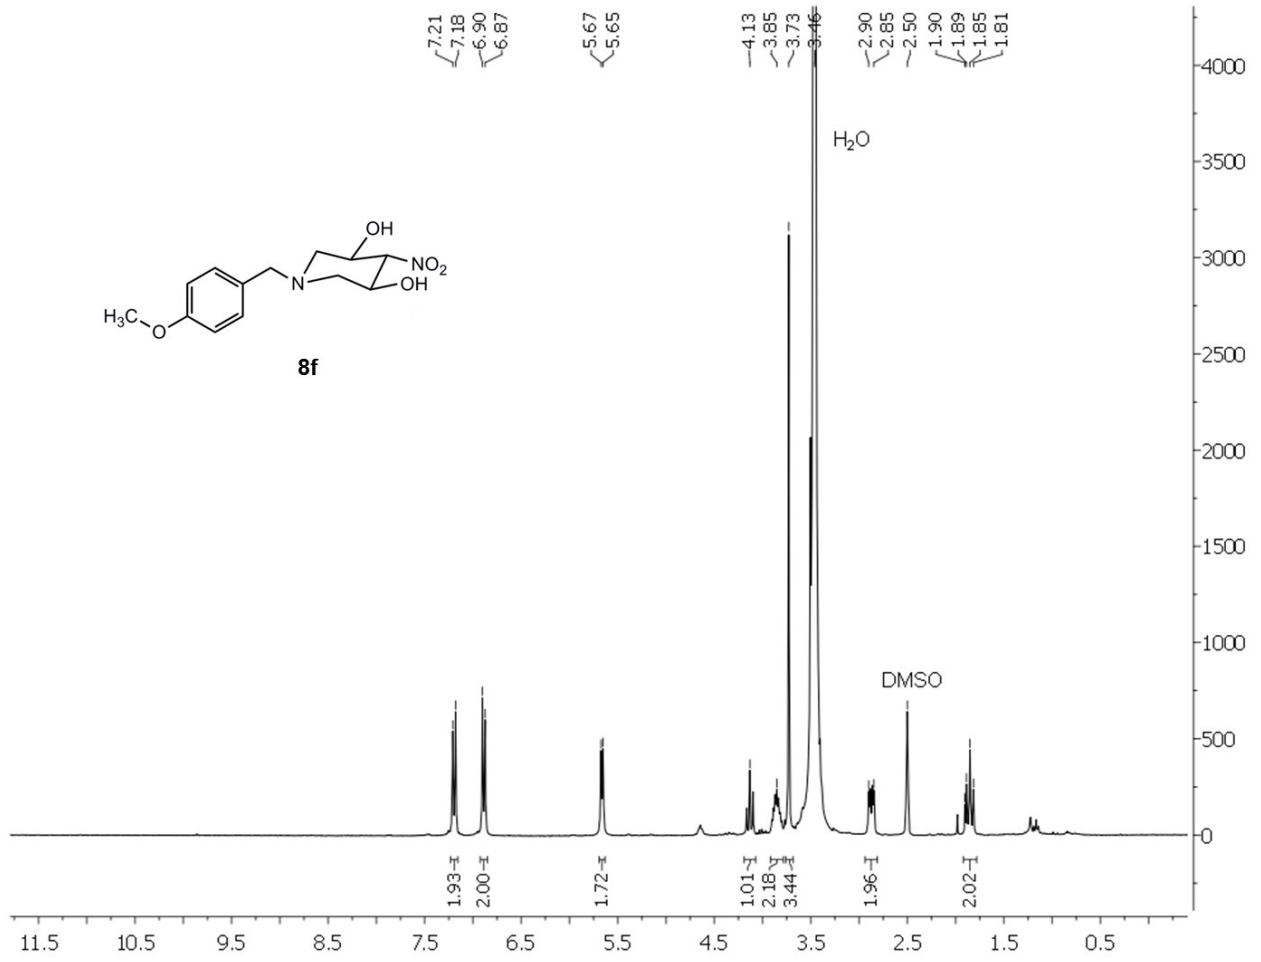

SI23

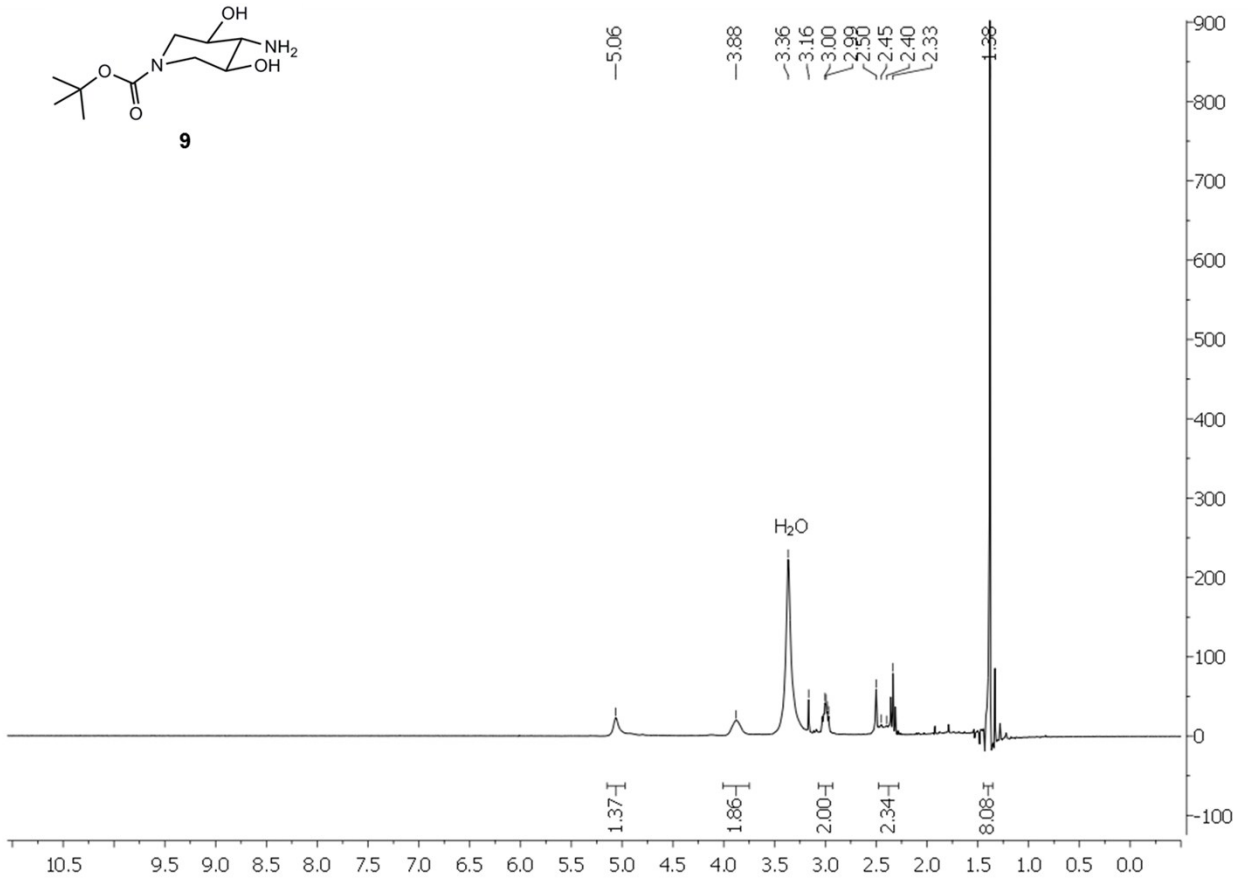

SI24

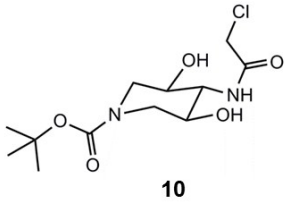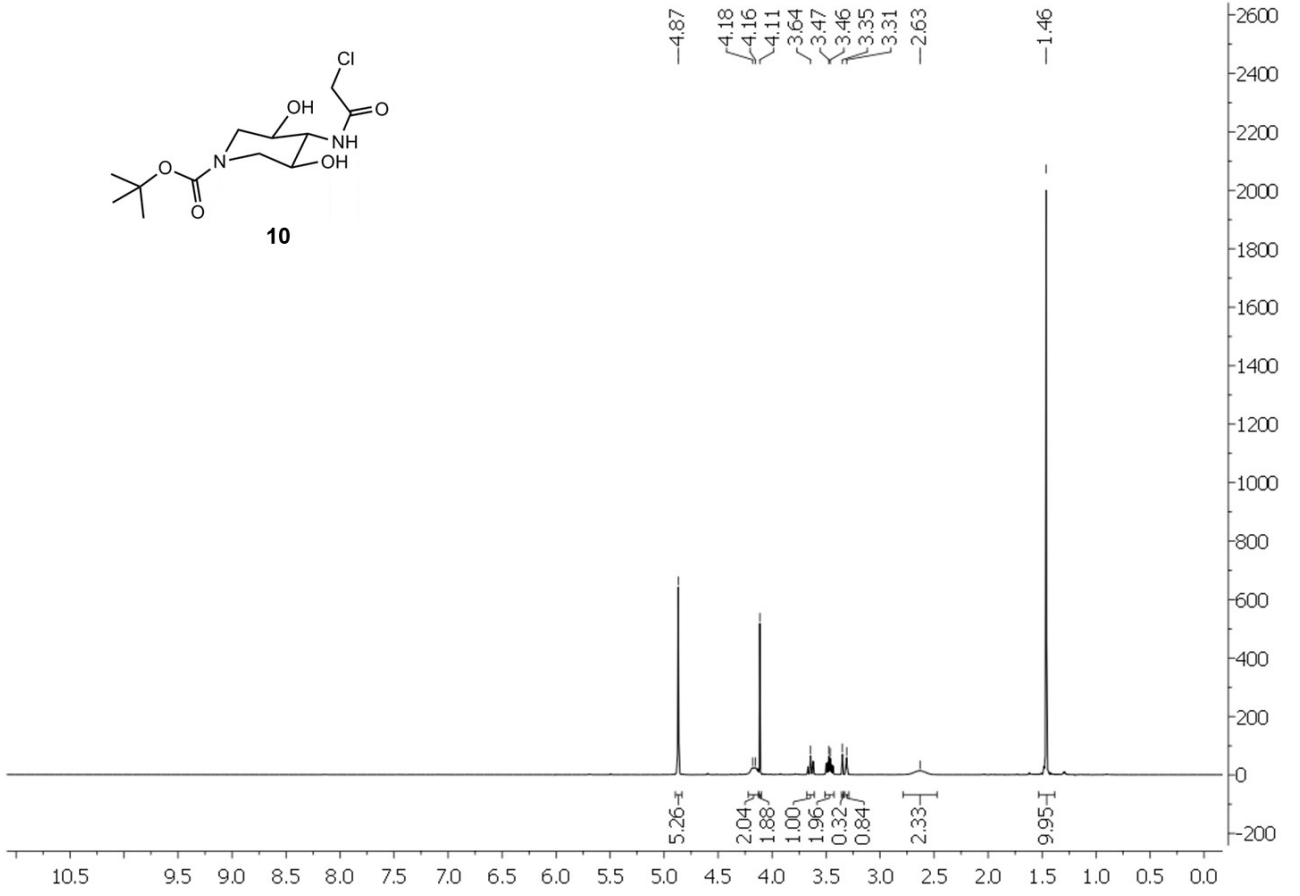



SI25

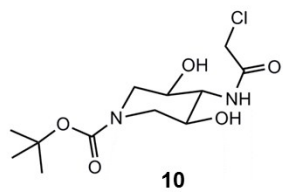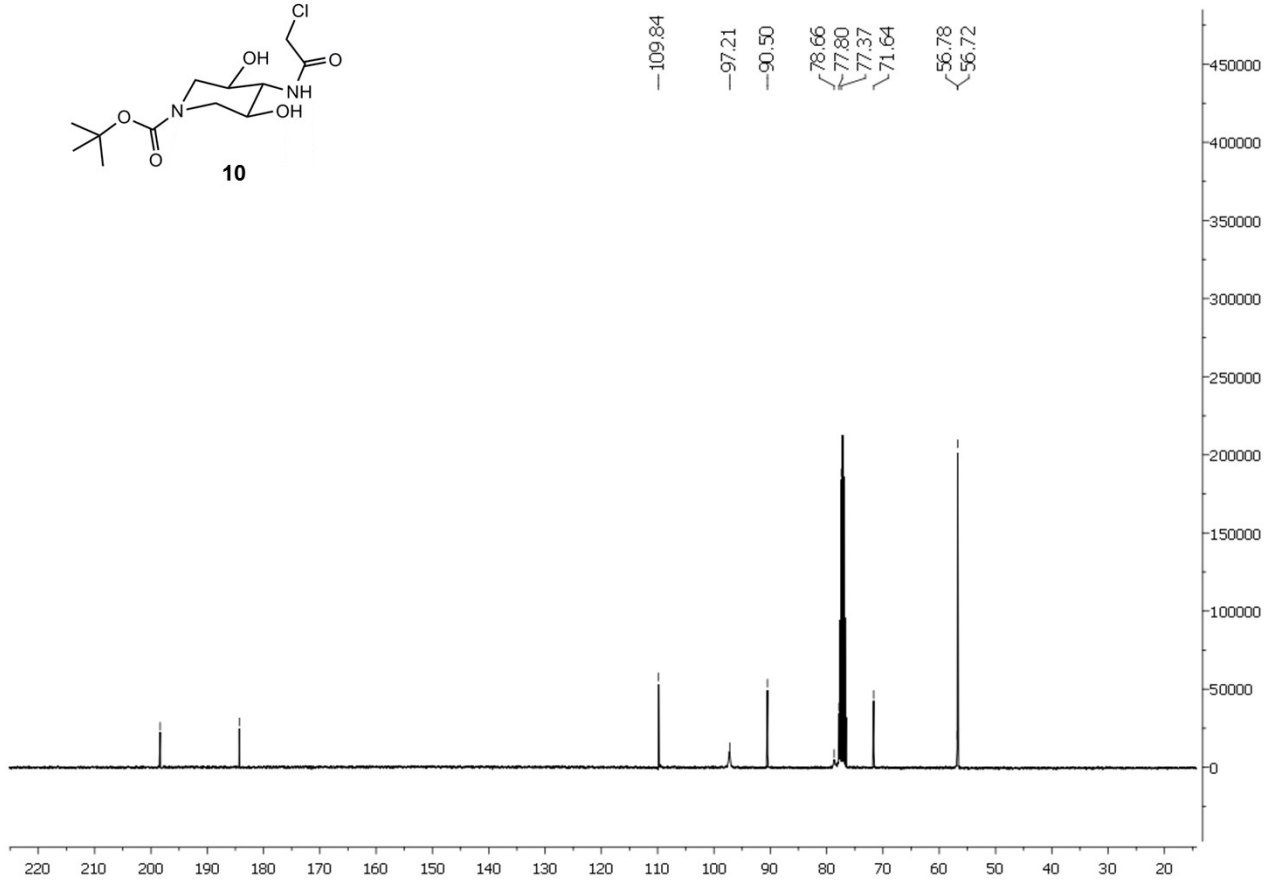

SI26

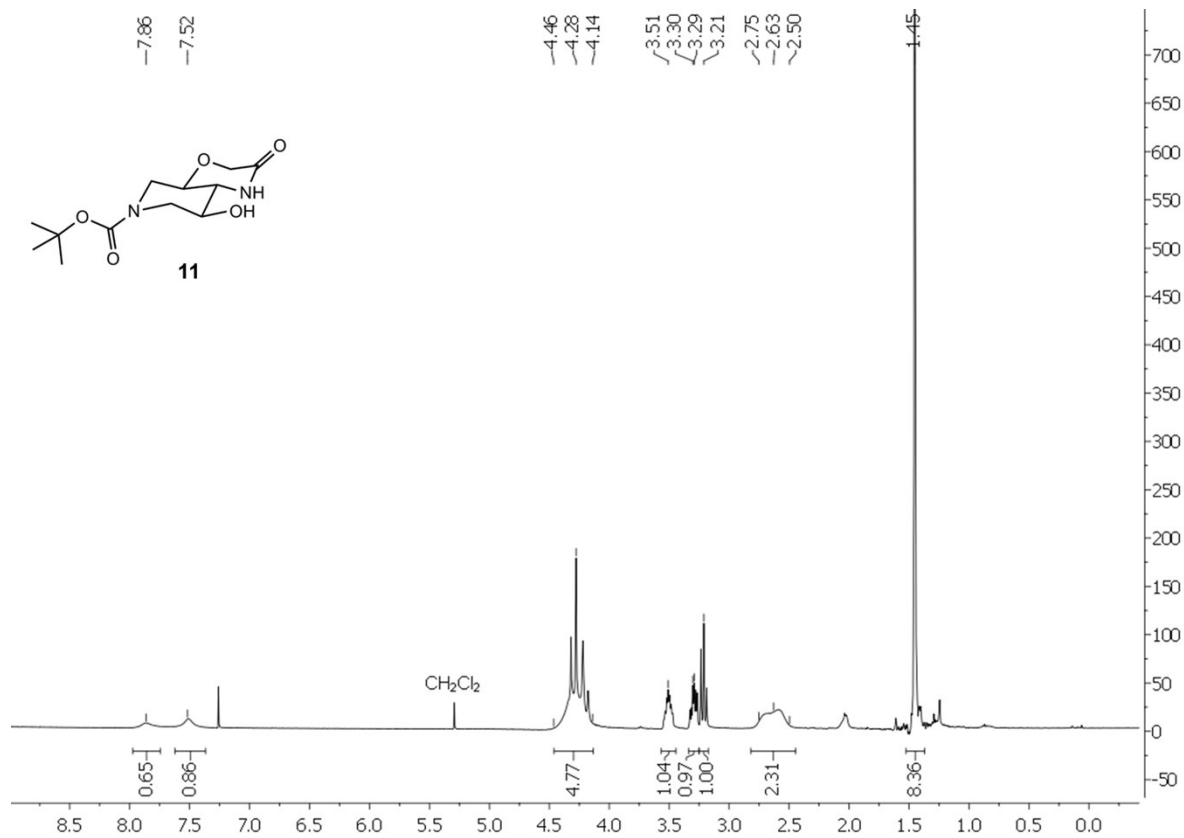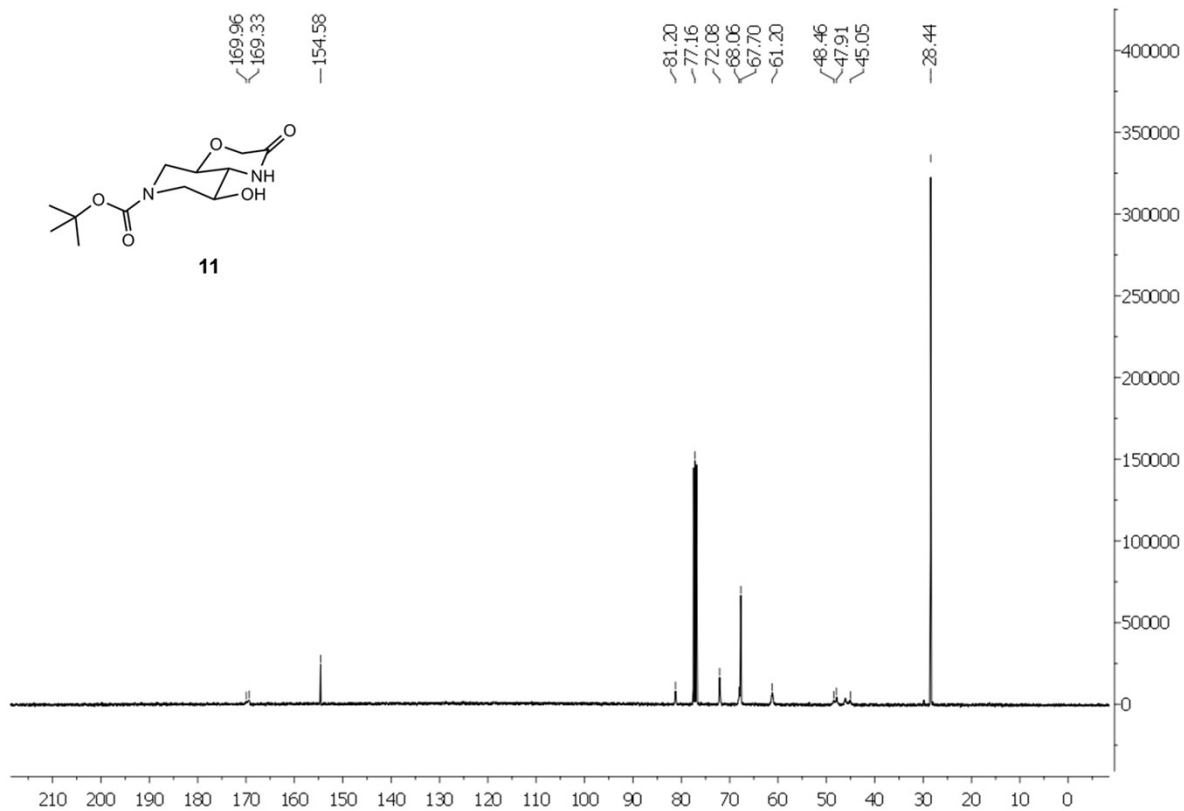

SI27

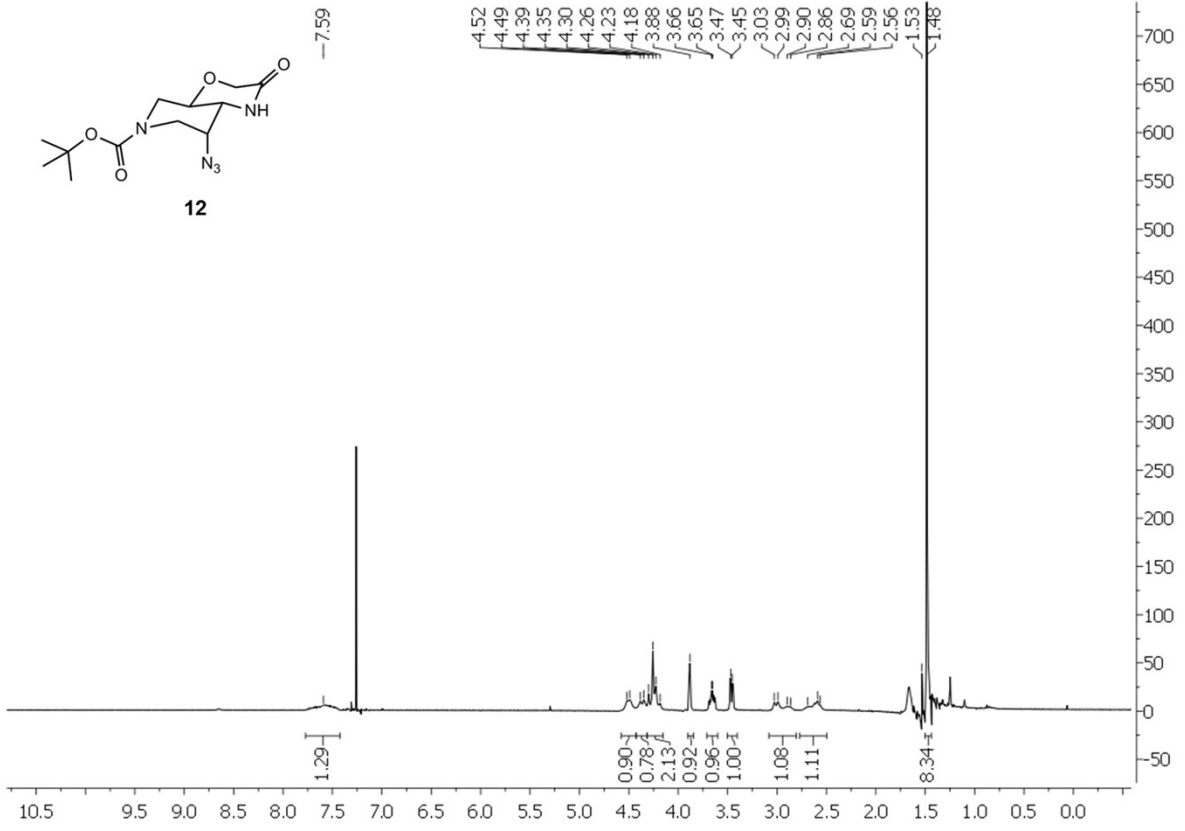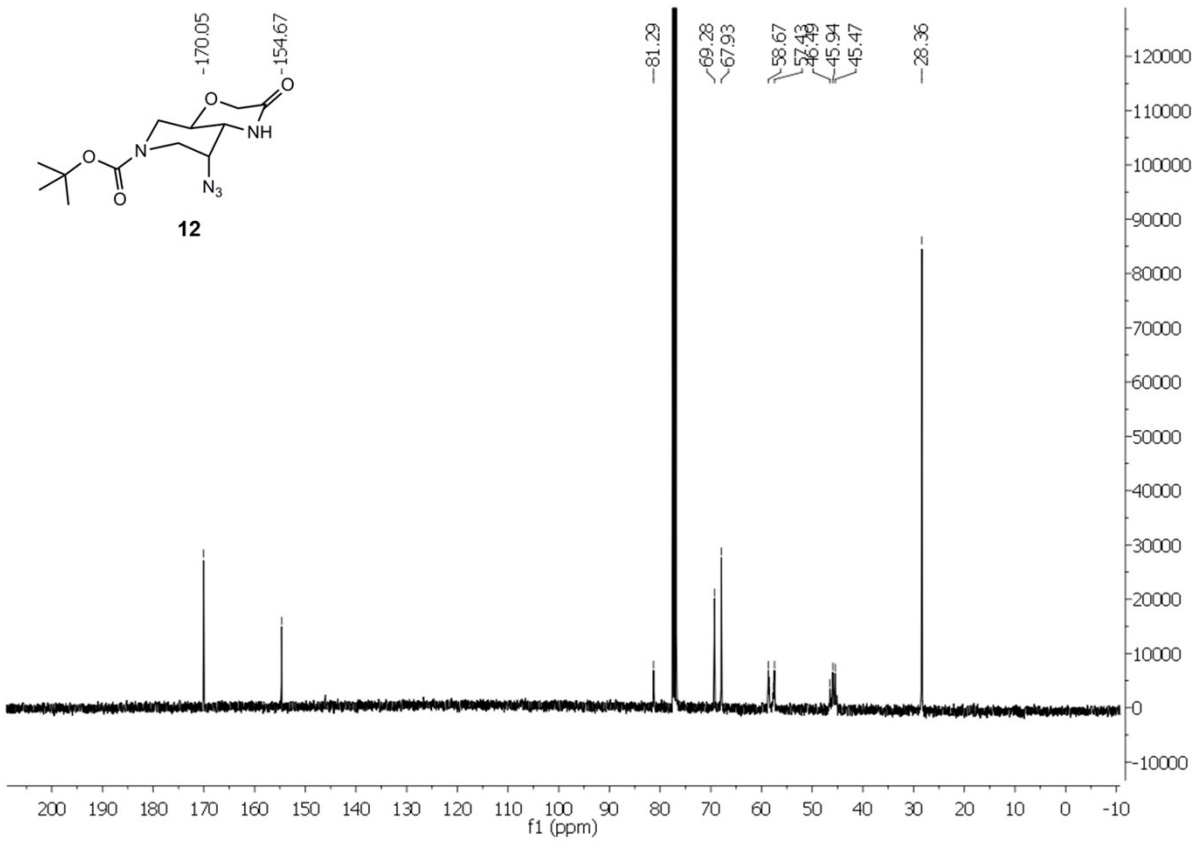

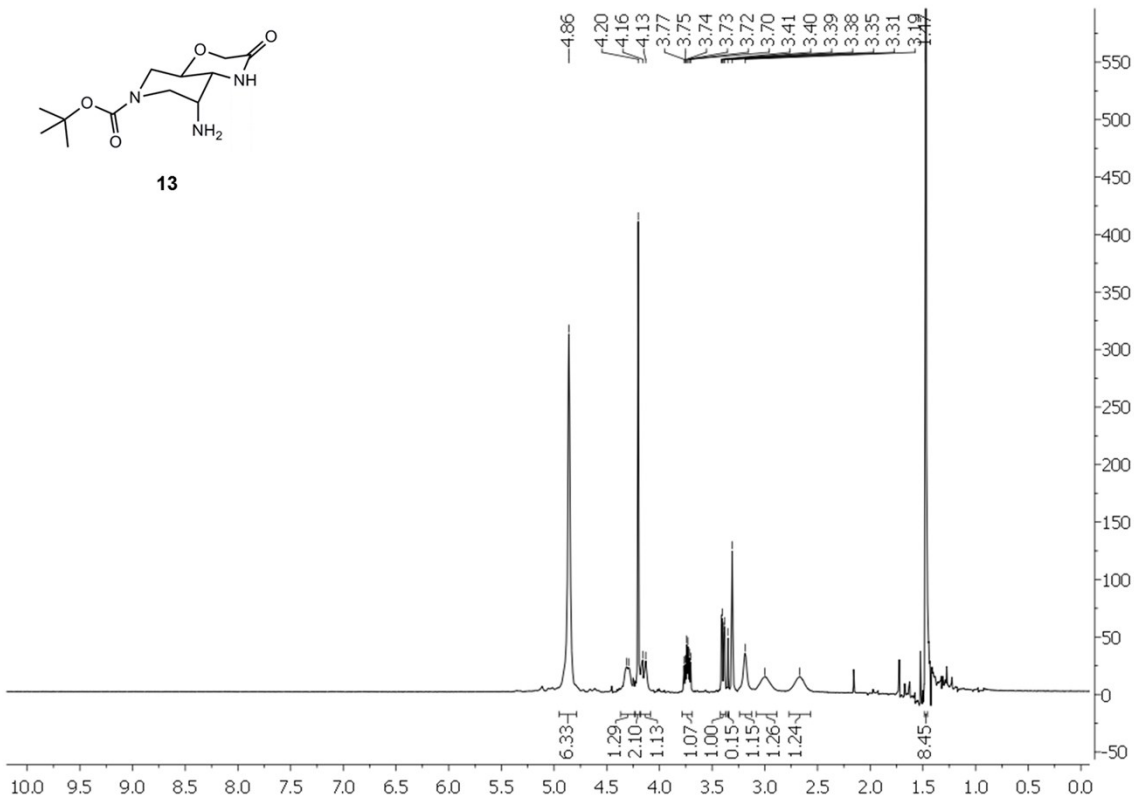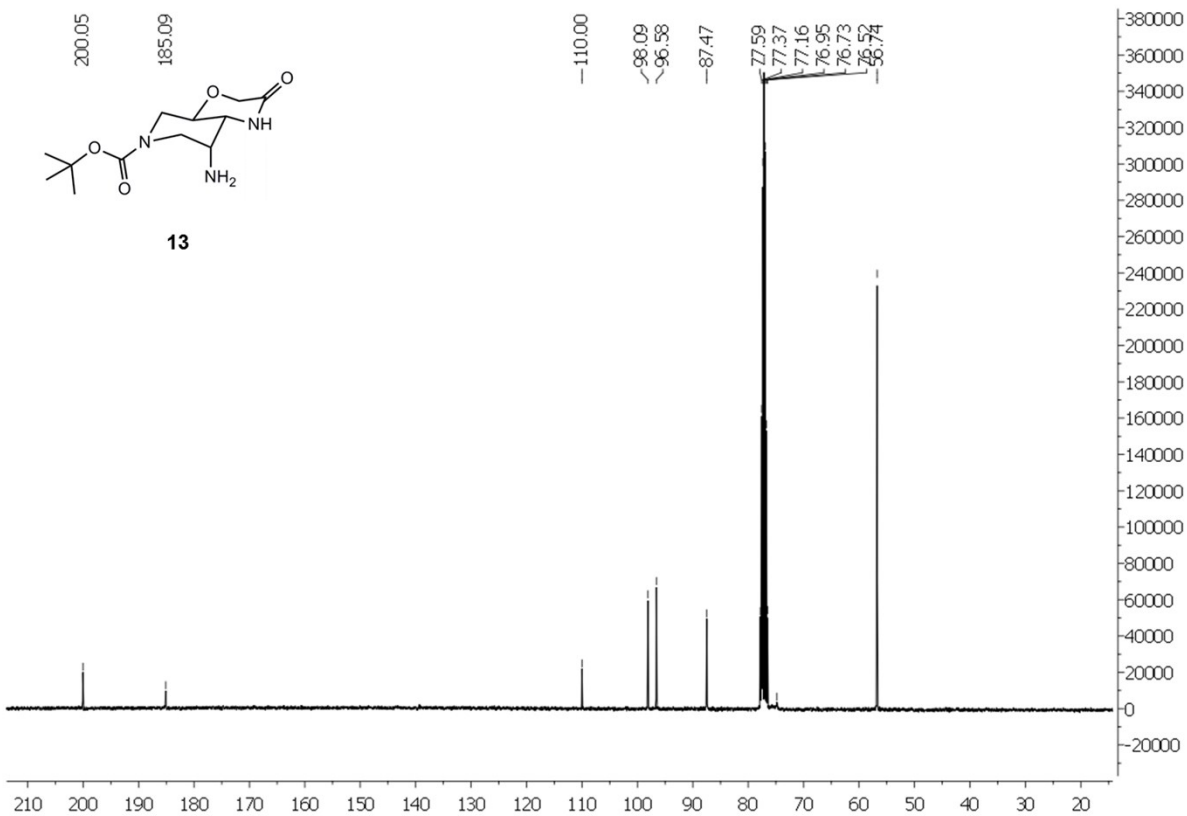

SI29

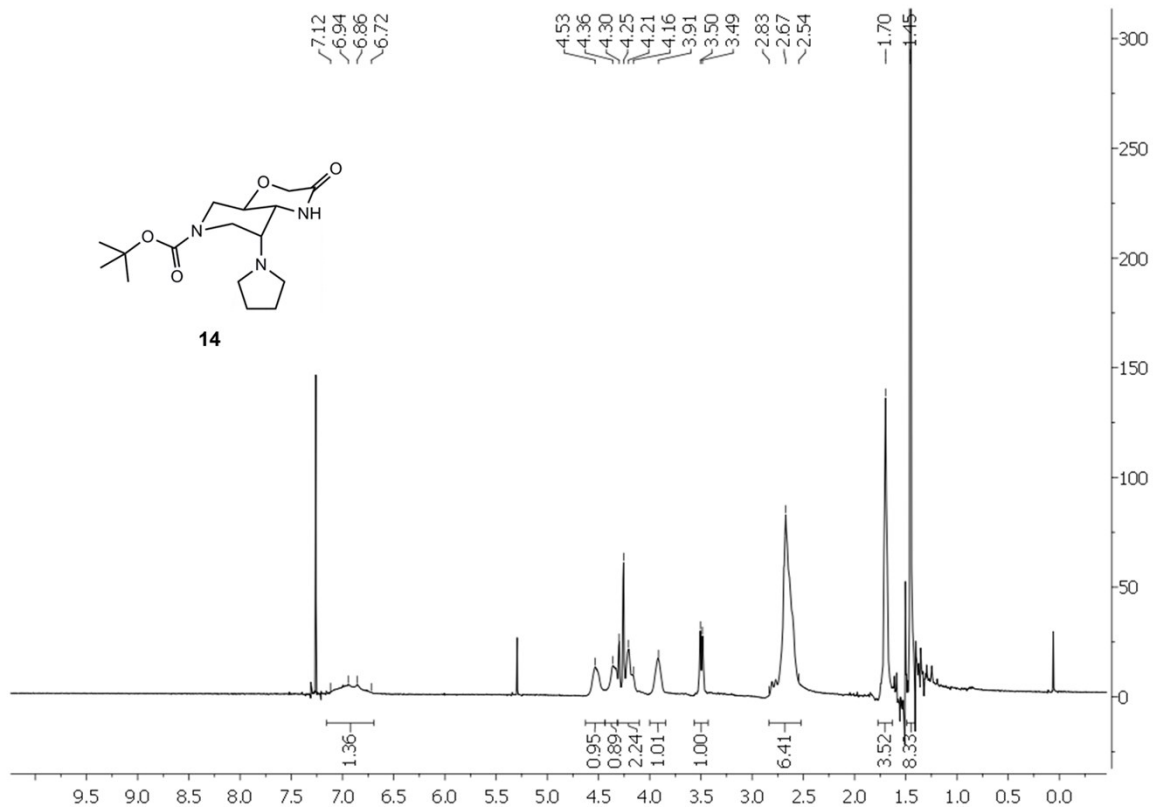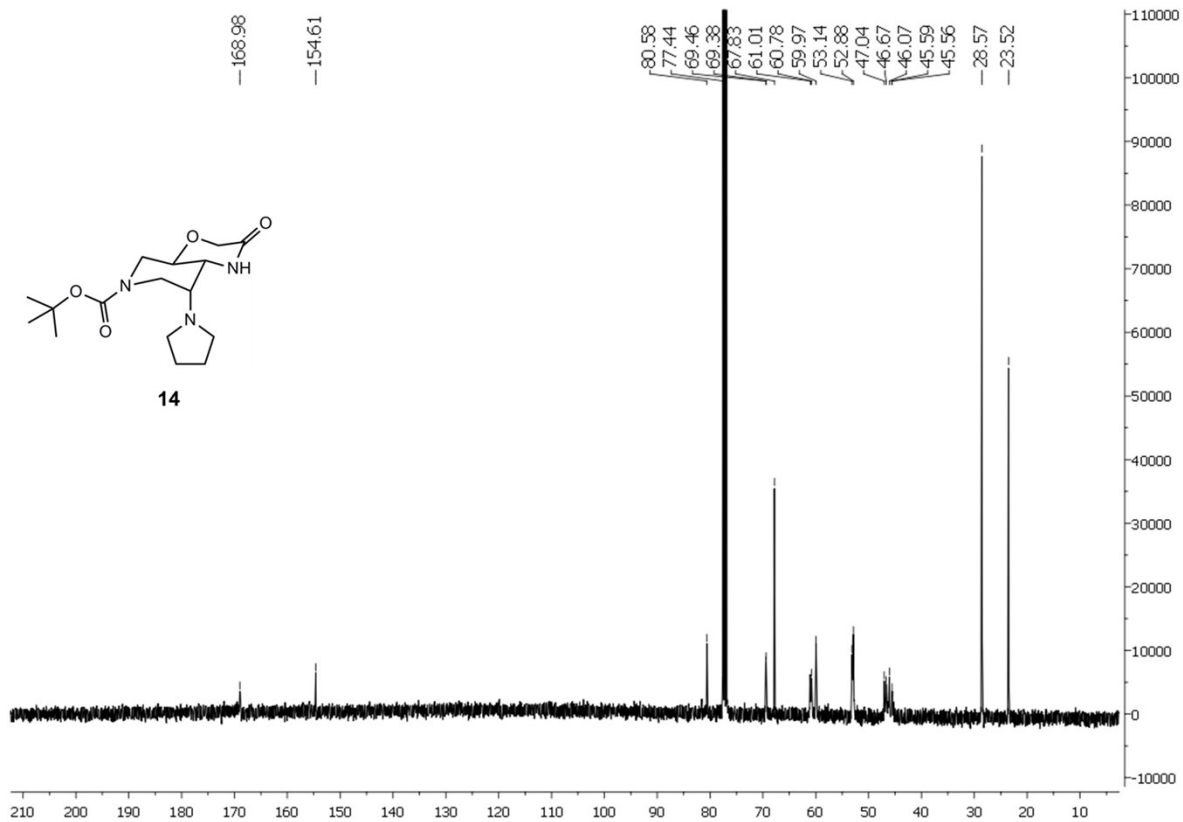

SI30

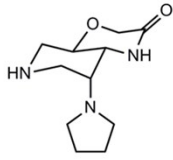

15a

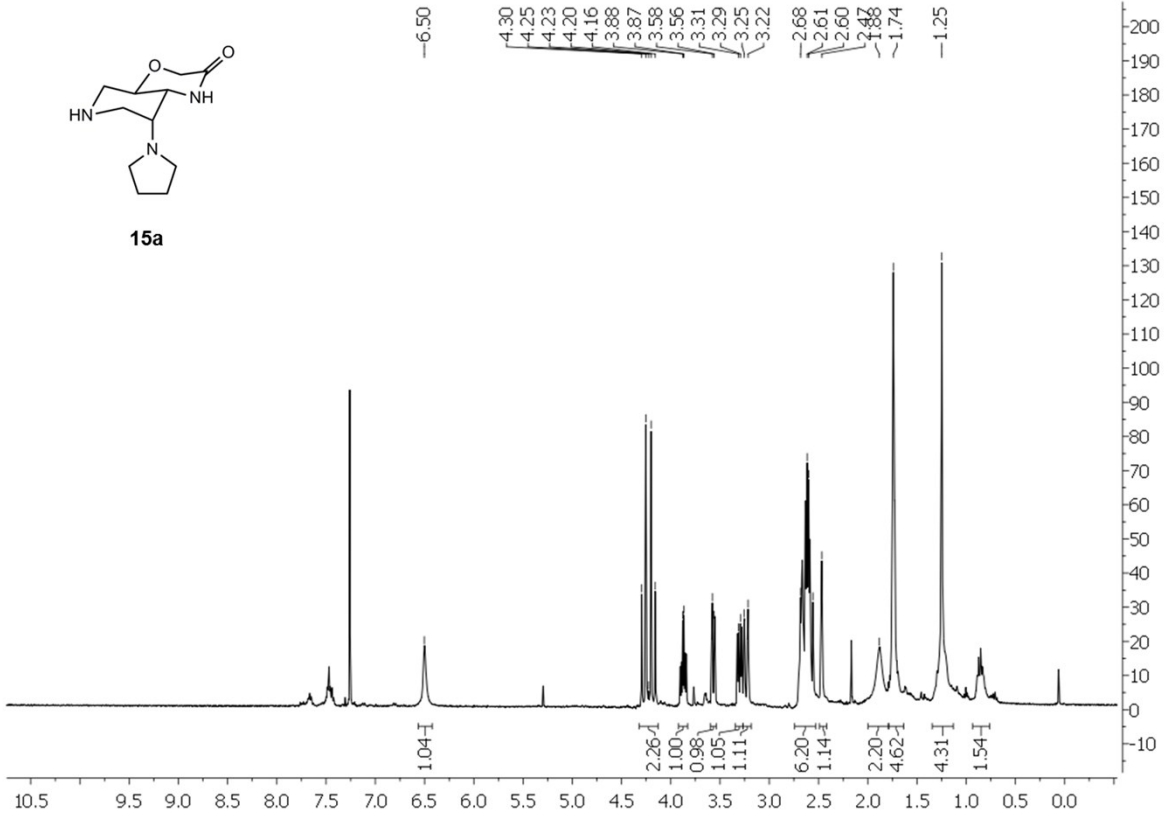

SI31

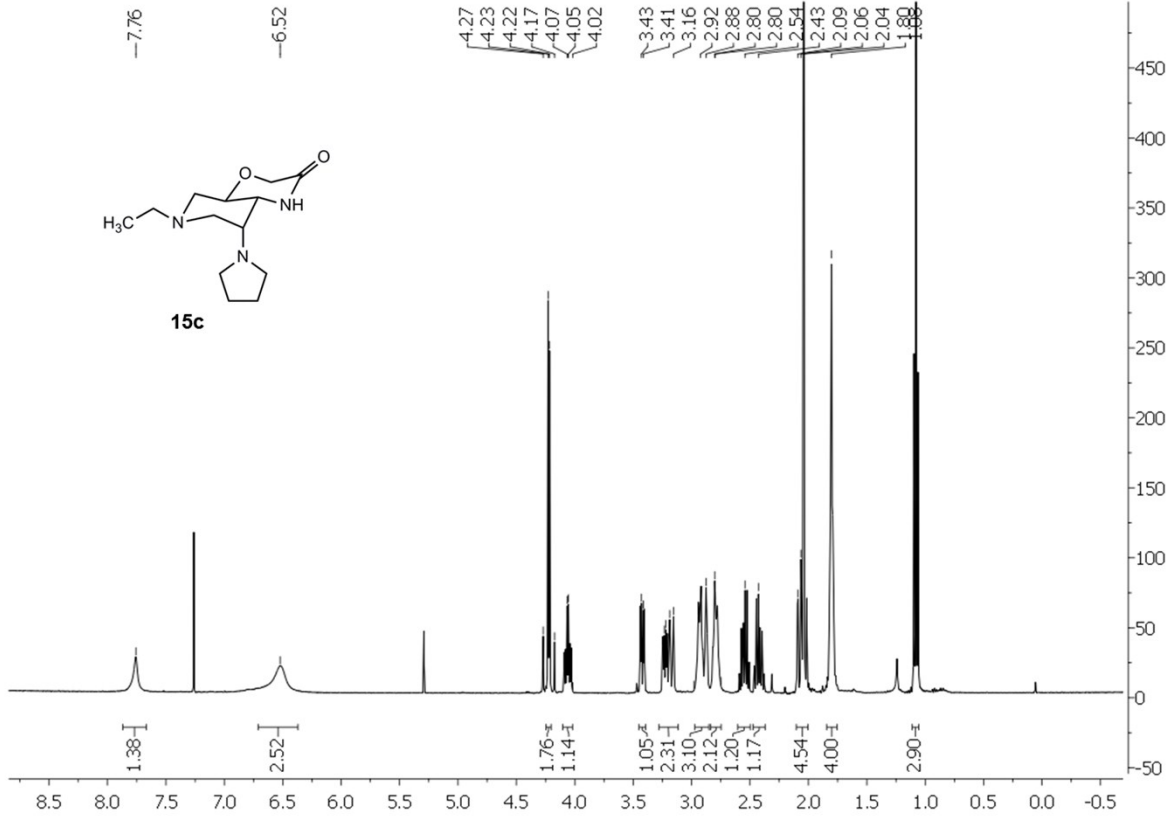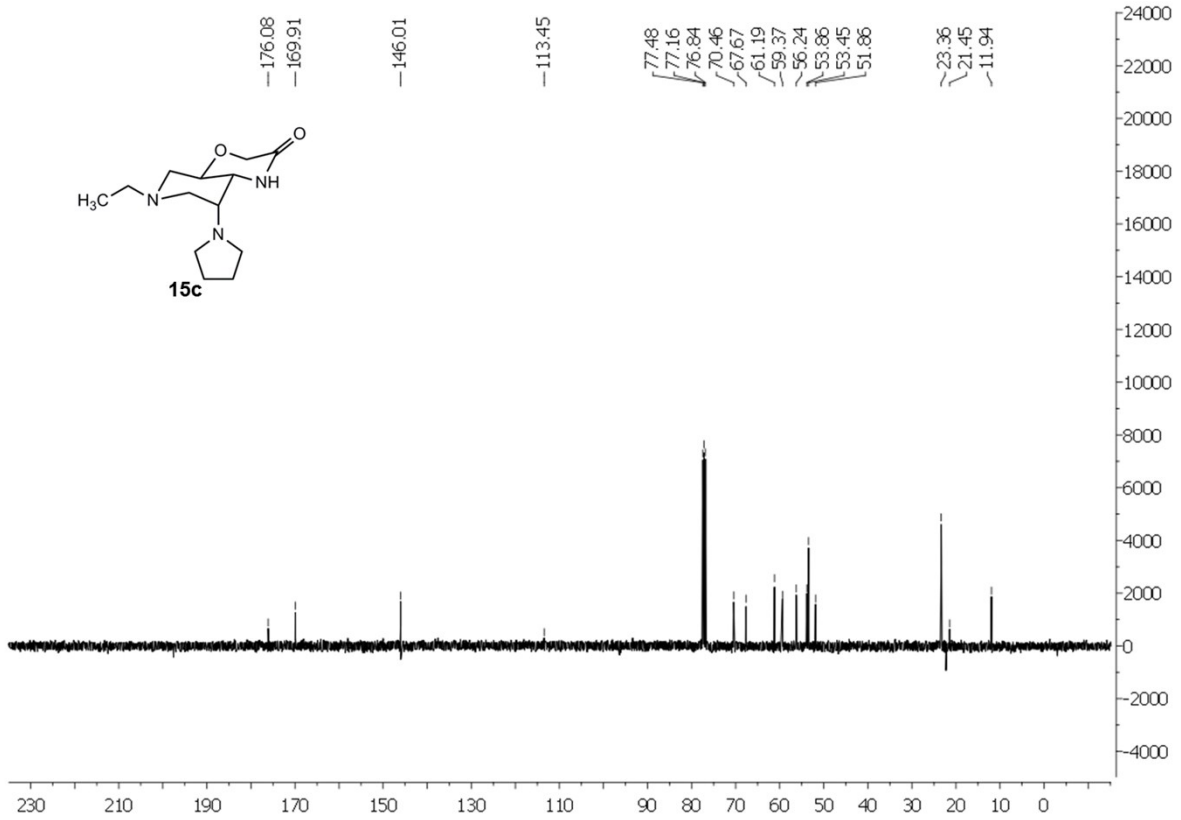

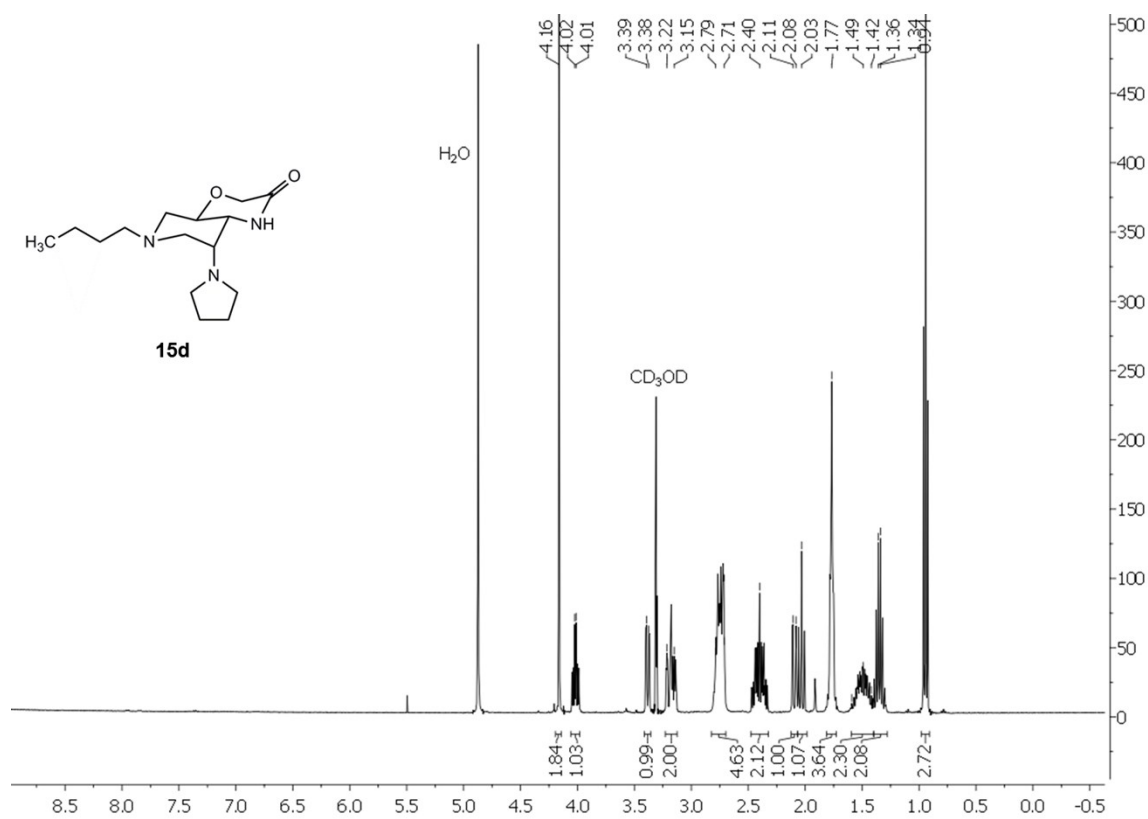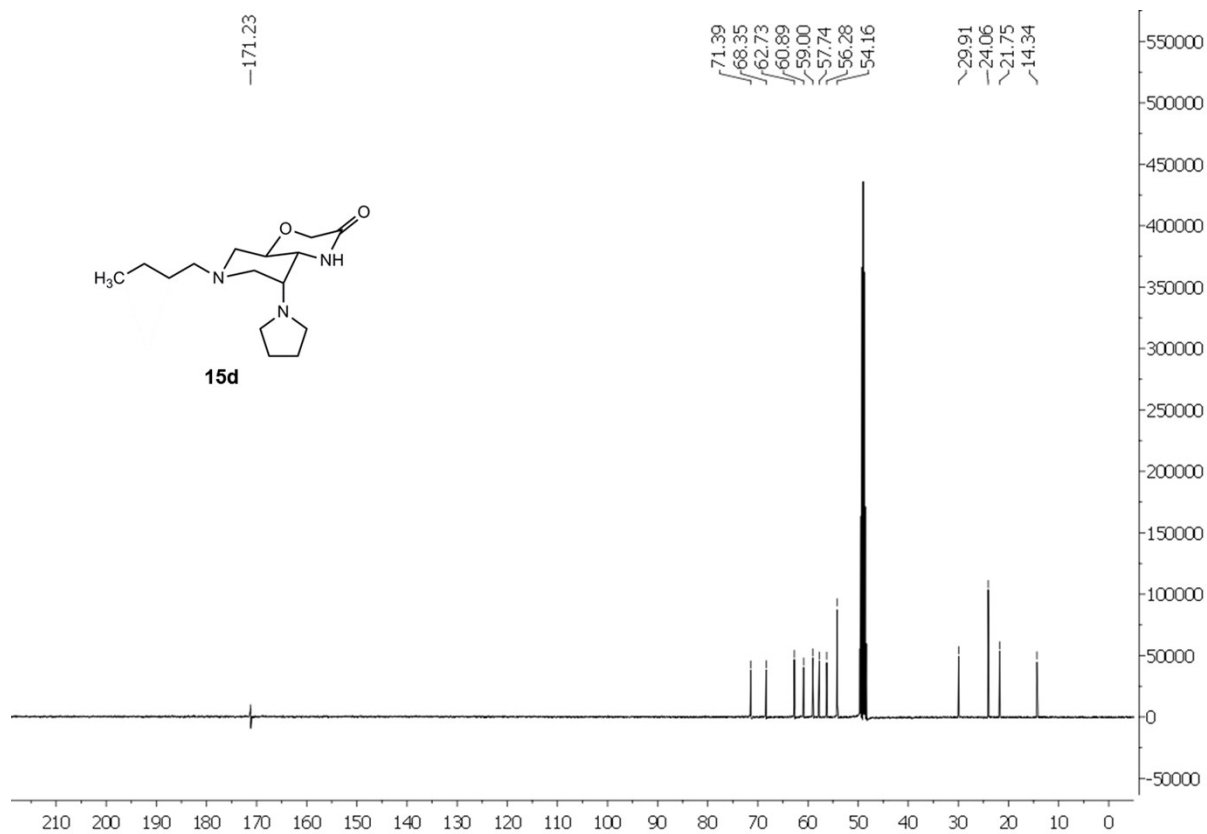



SI33

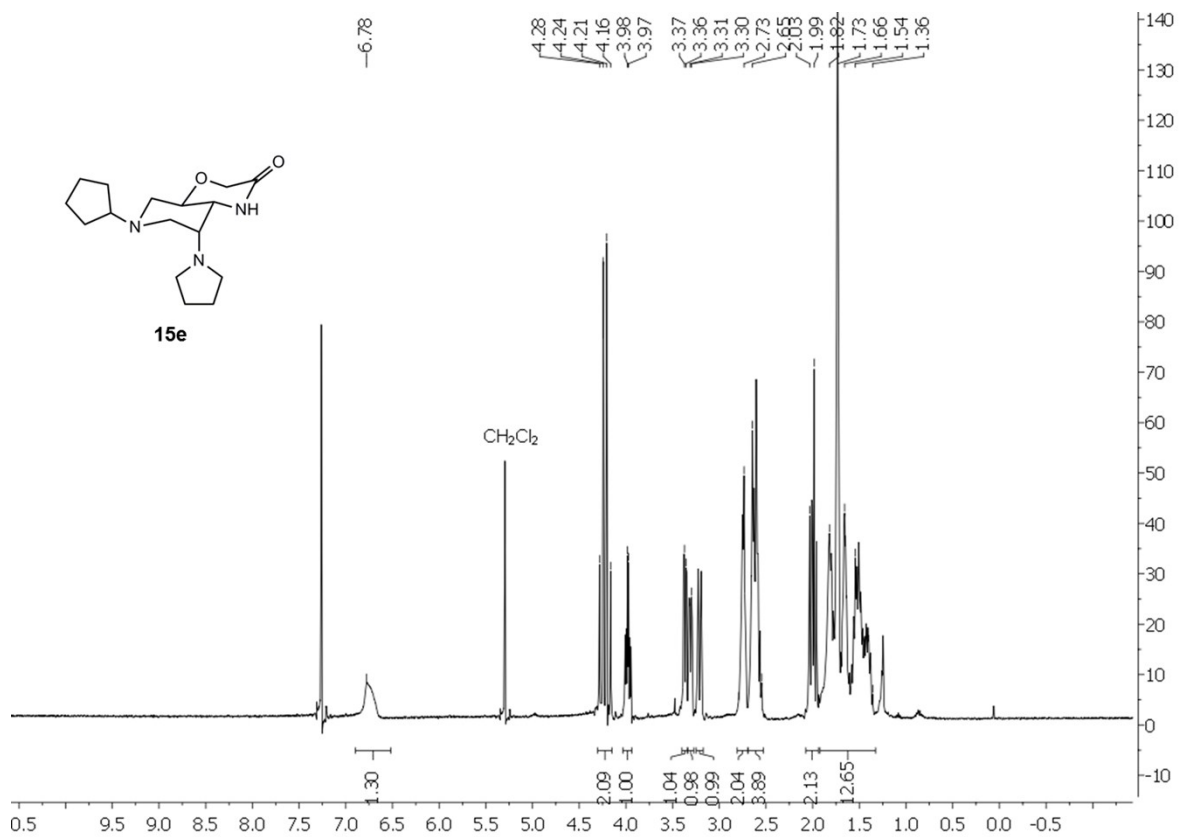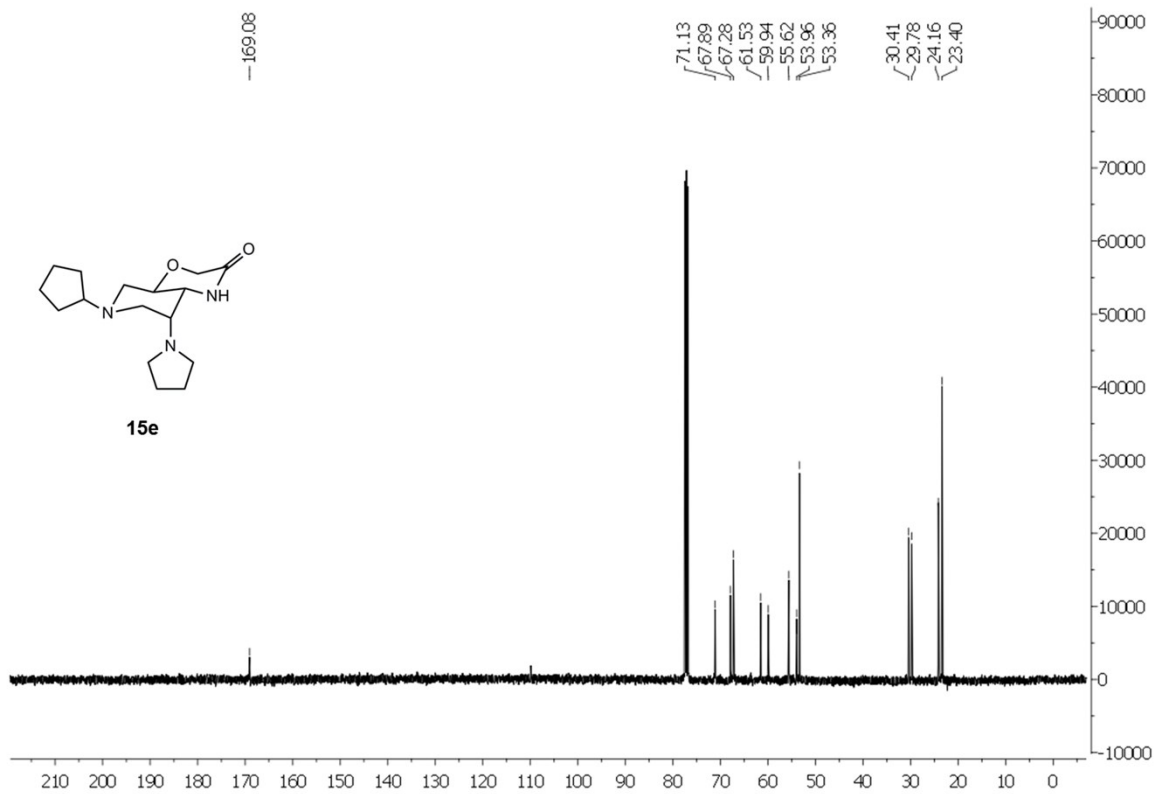

SI34

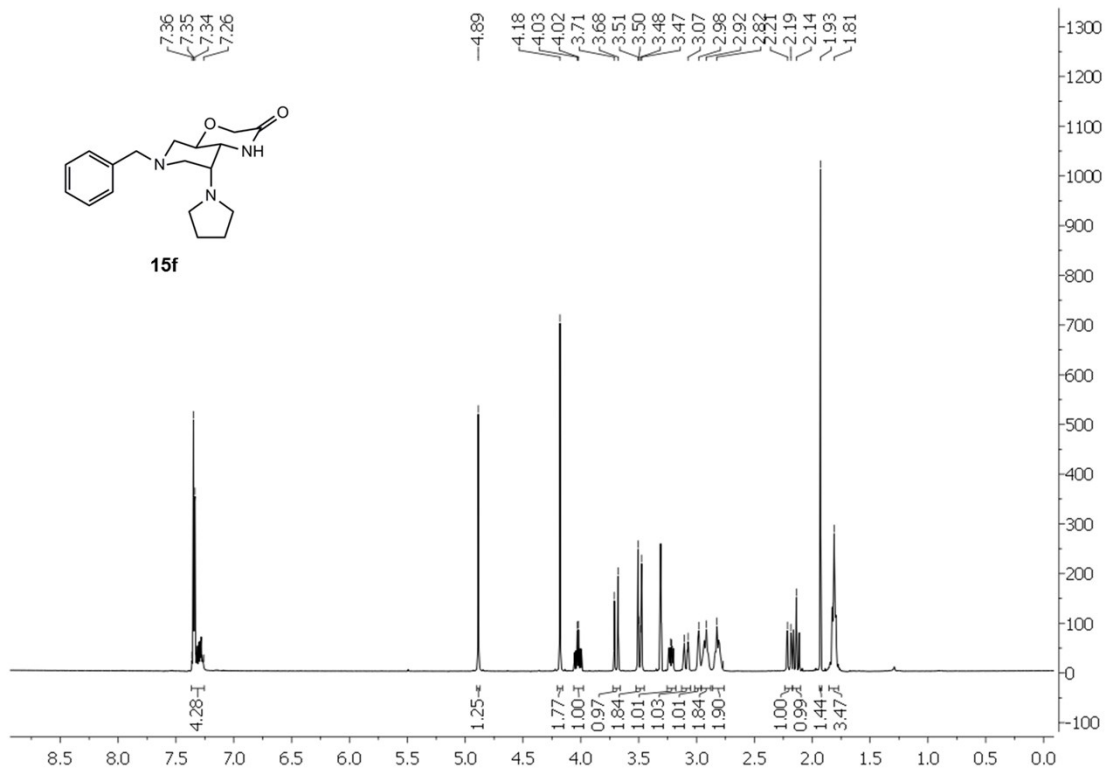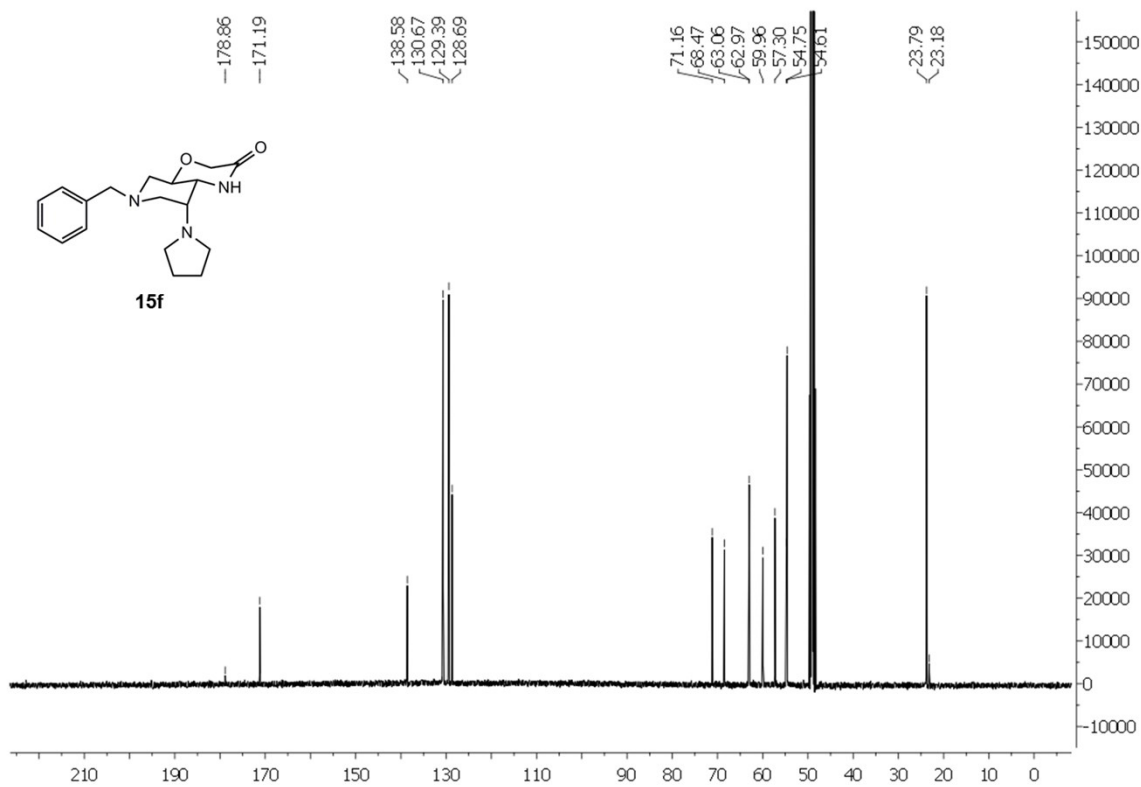

SI35

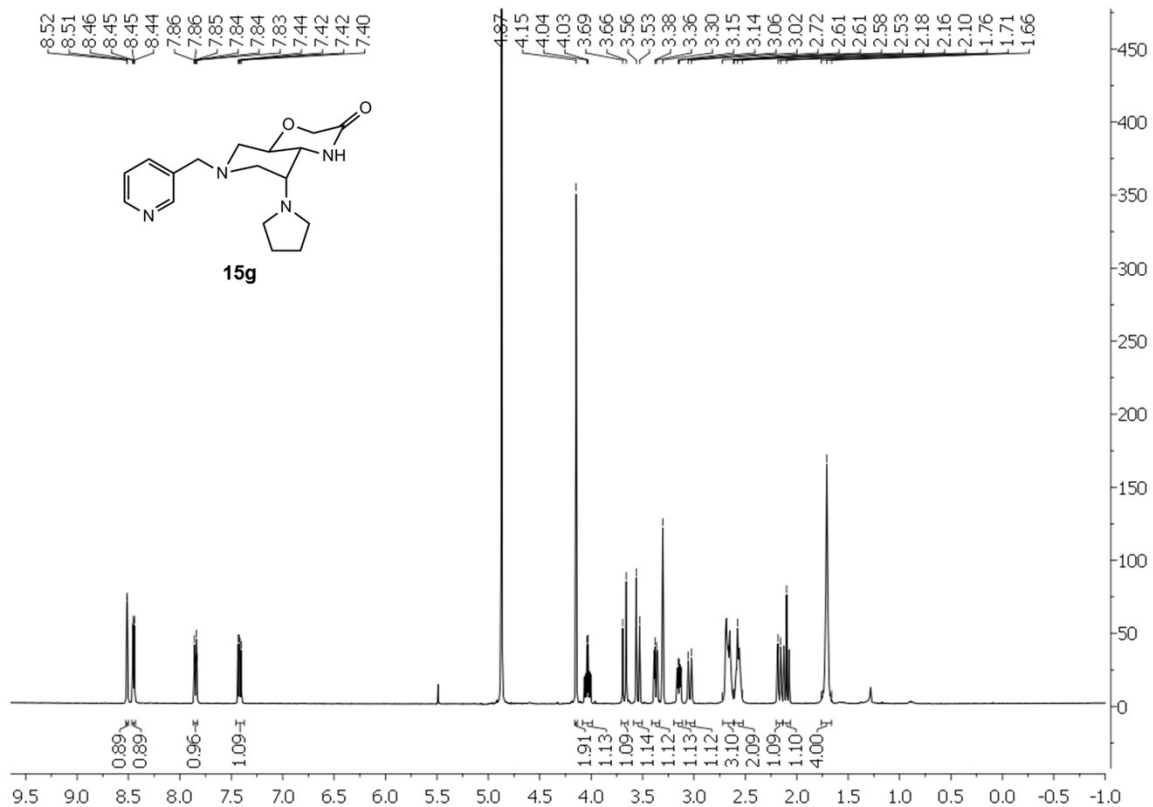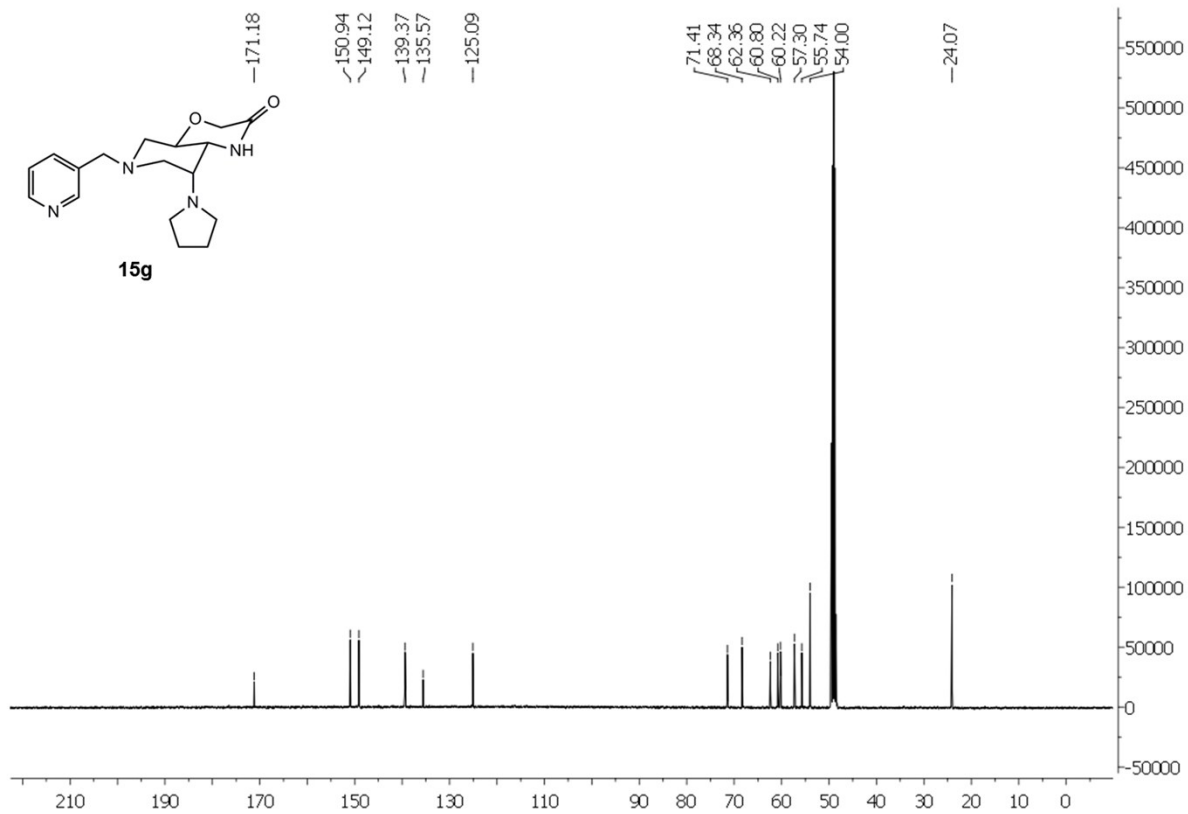

SI36

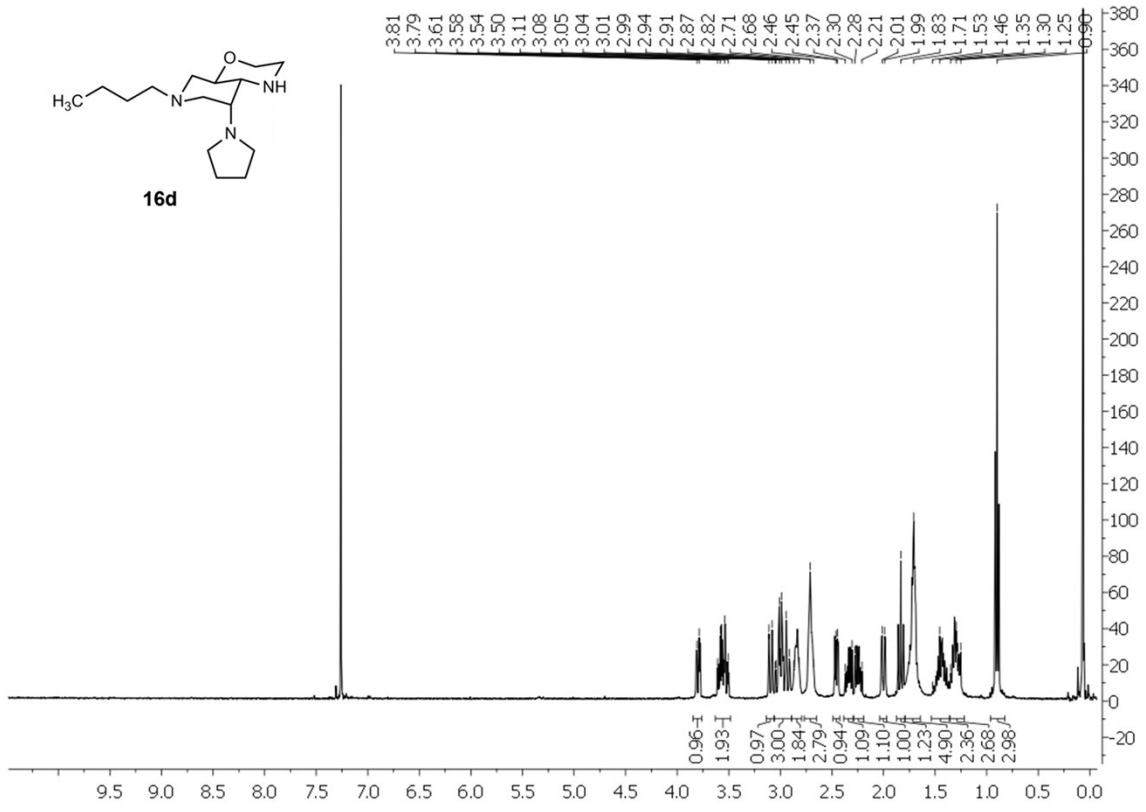

SI37

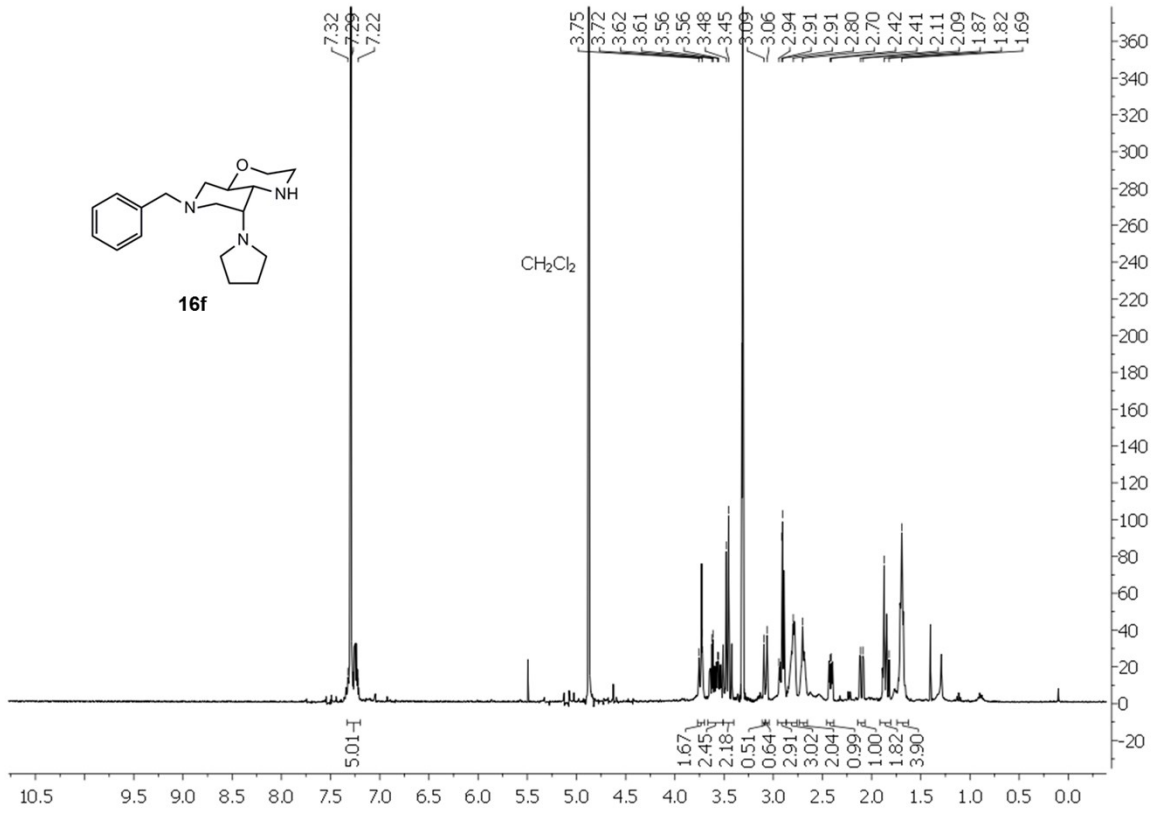

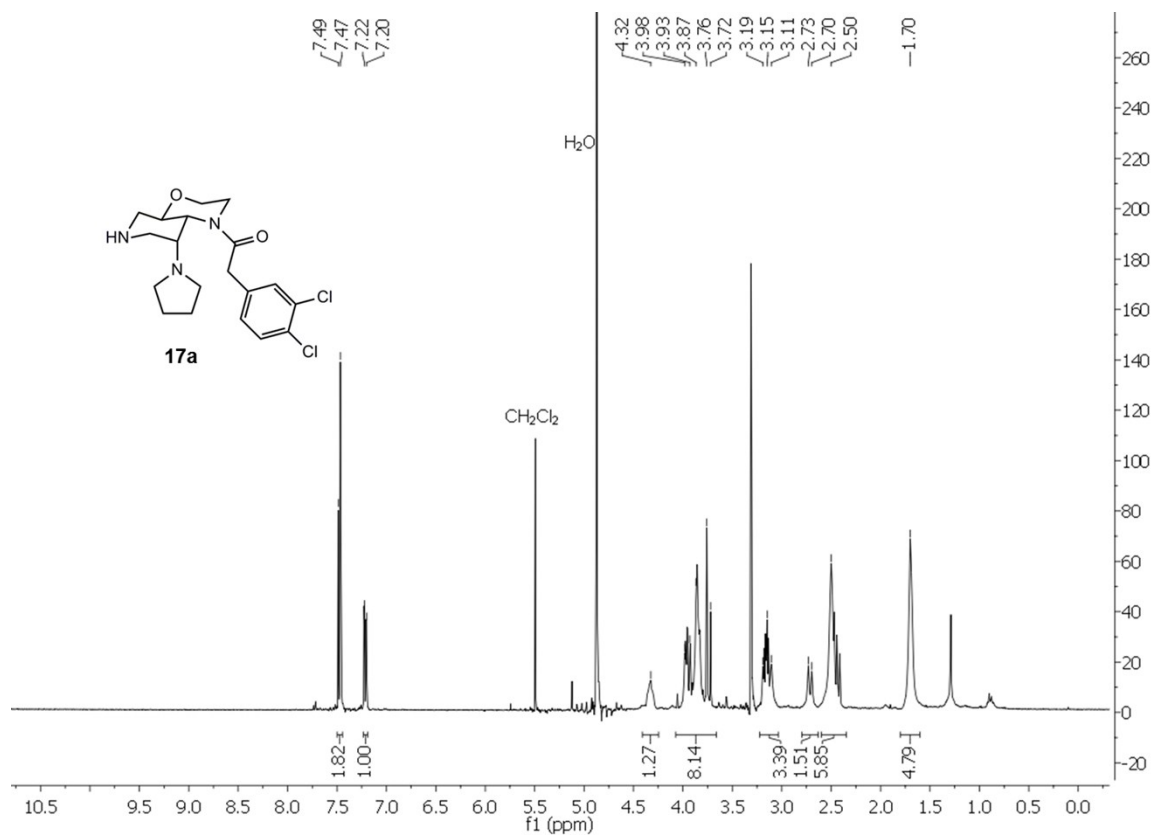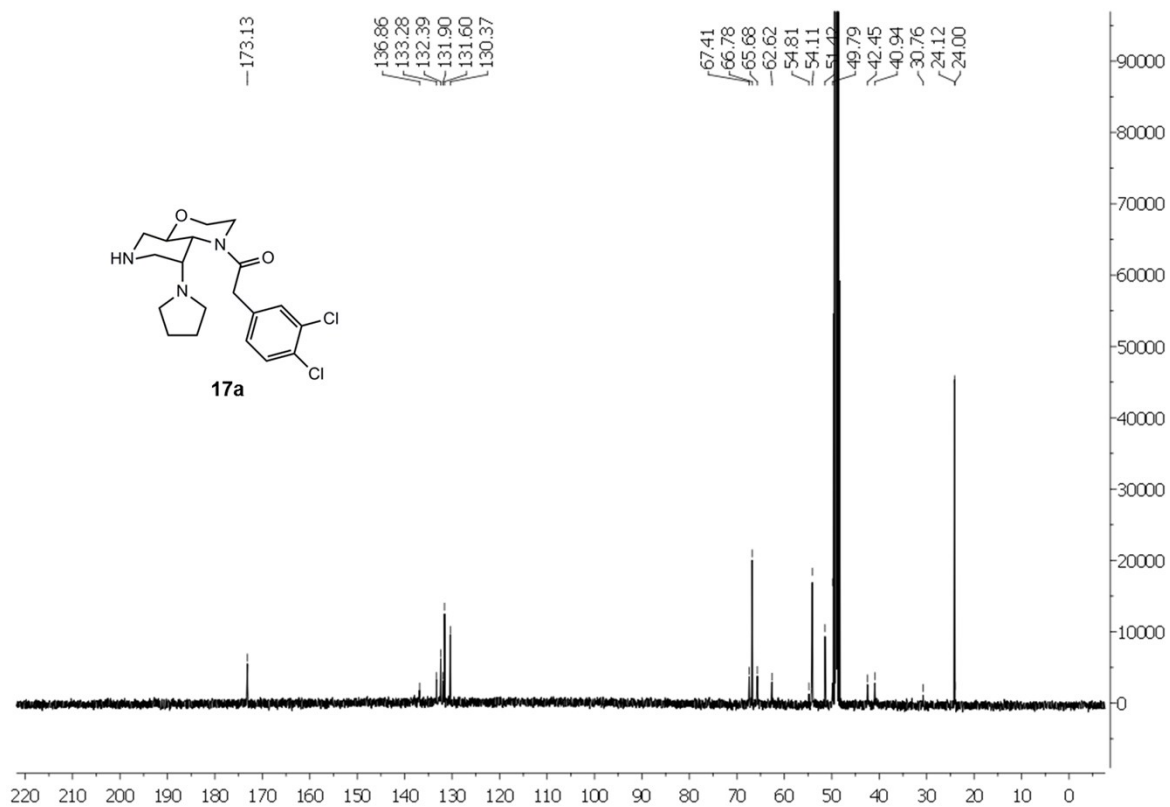

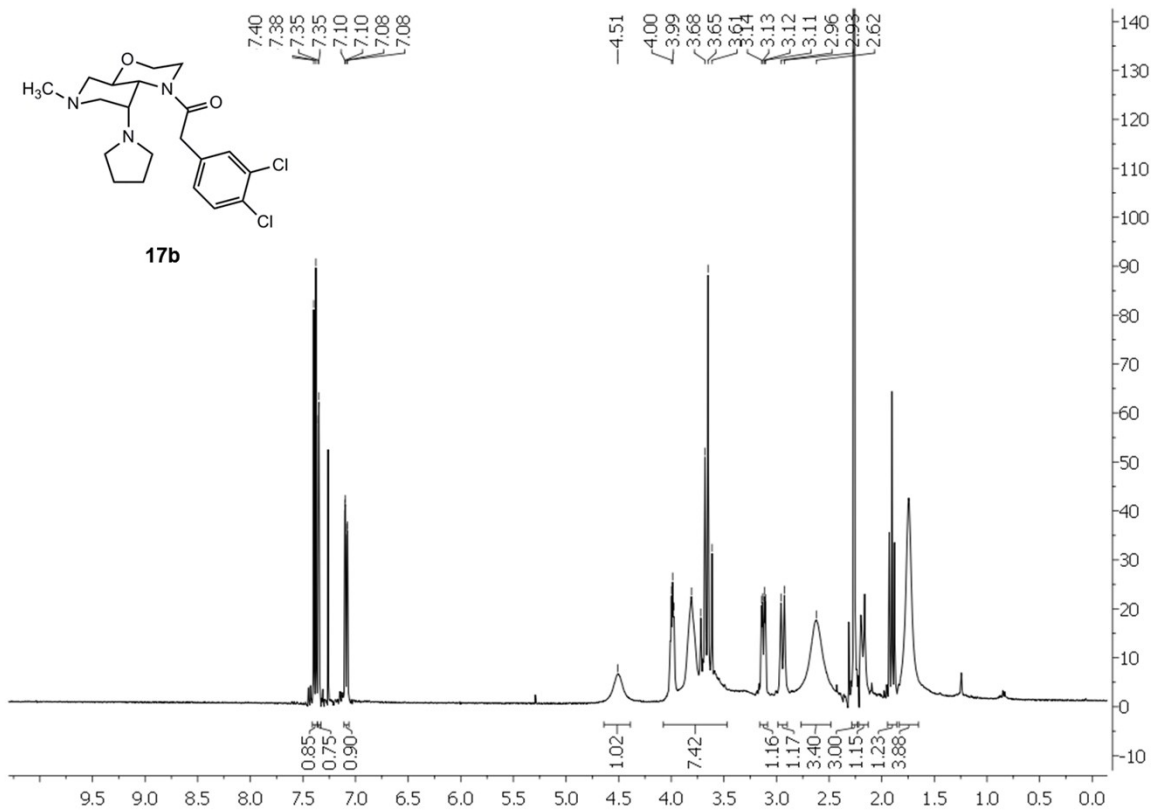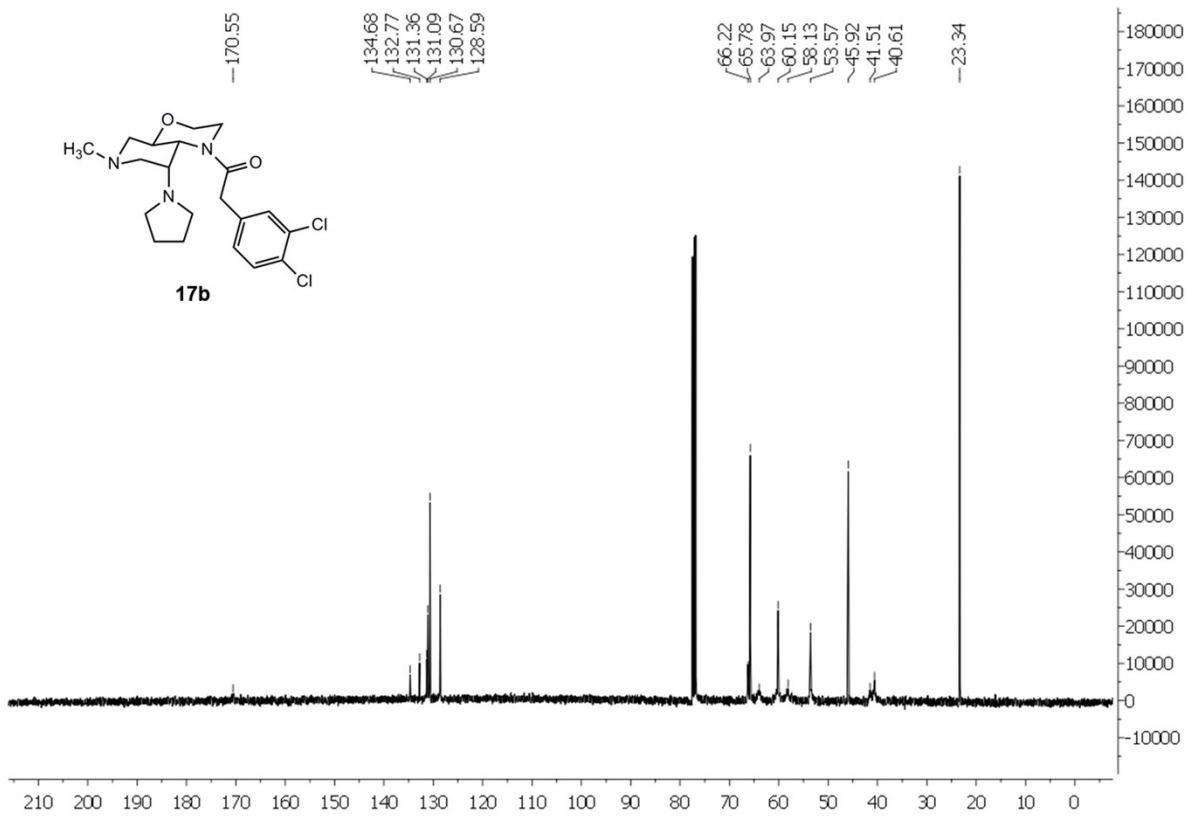

SI40

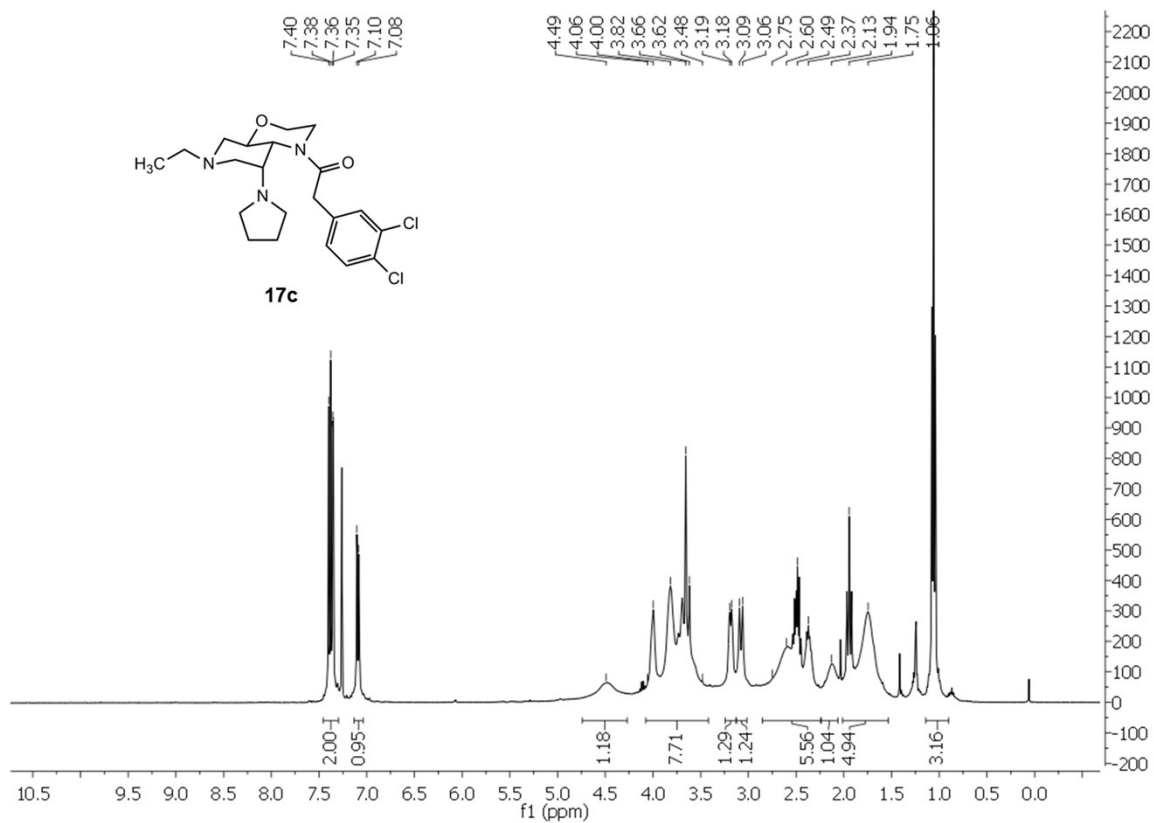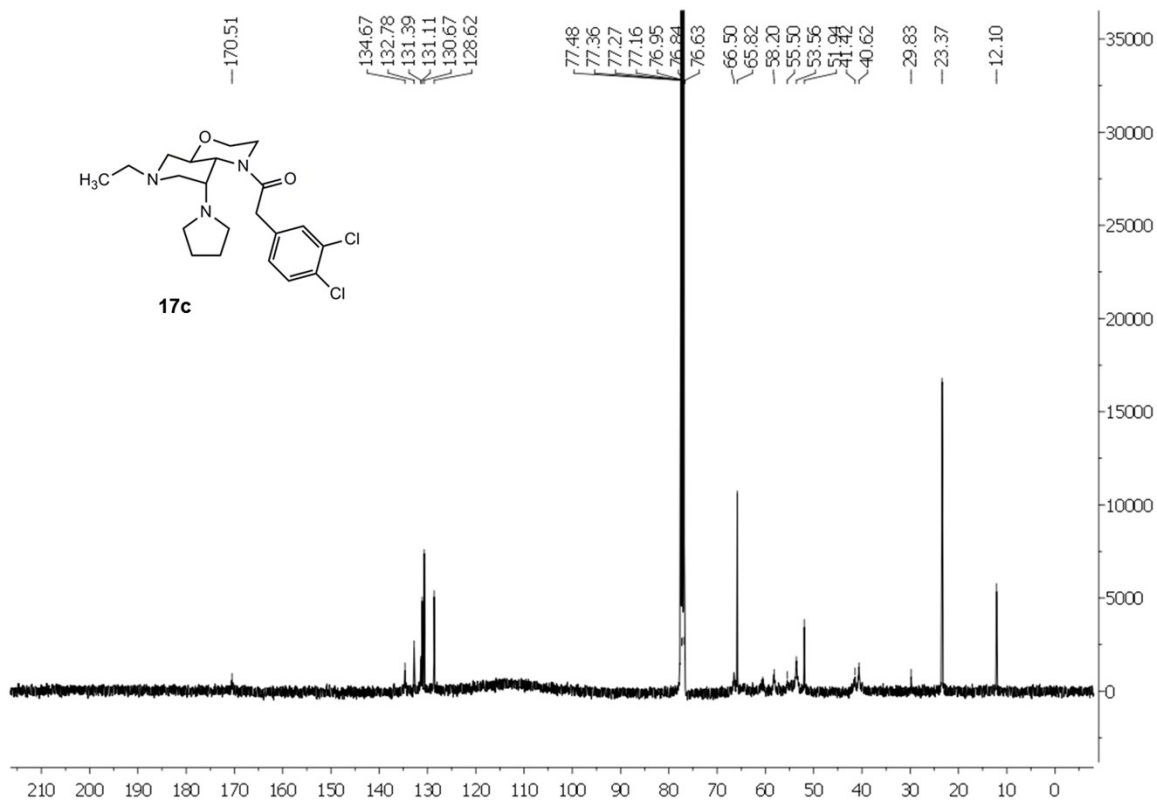



SI41

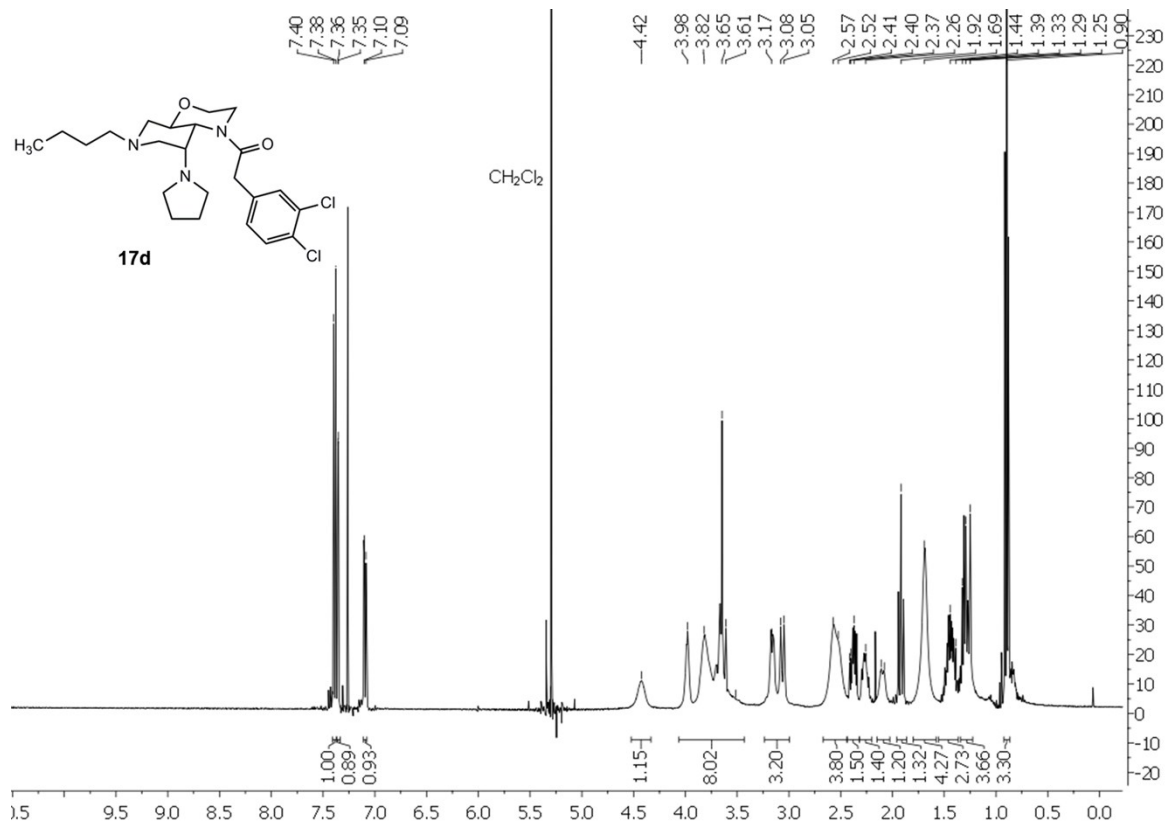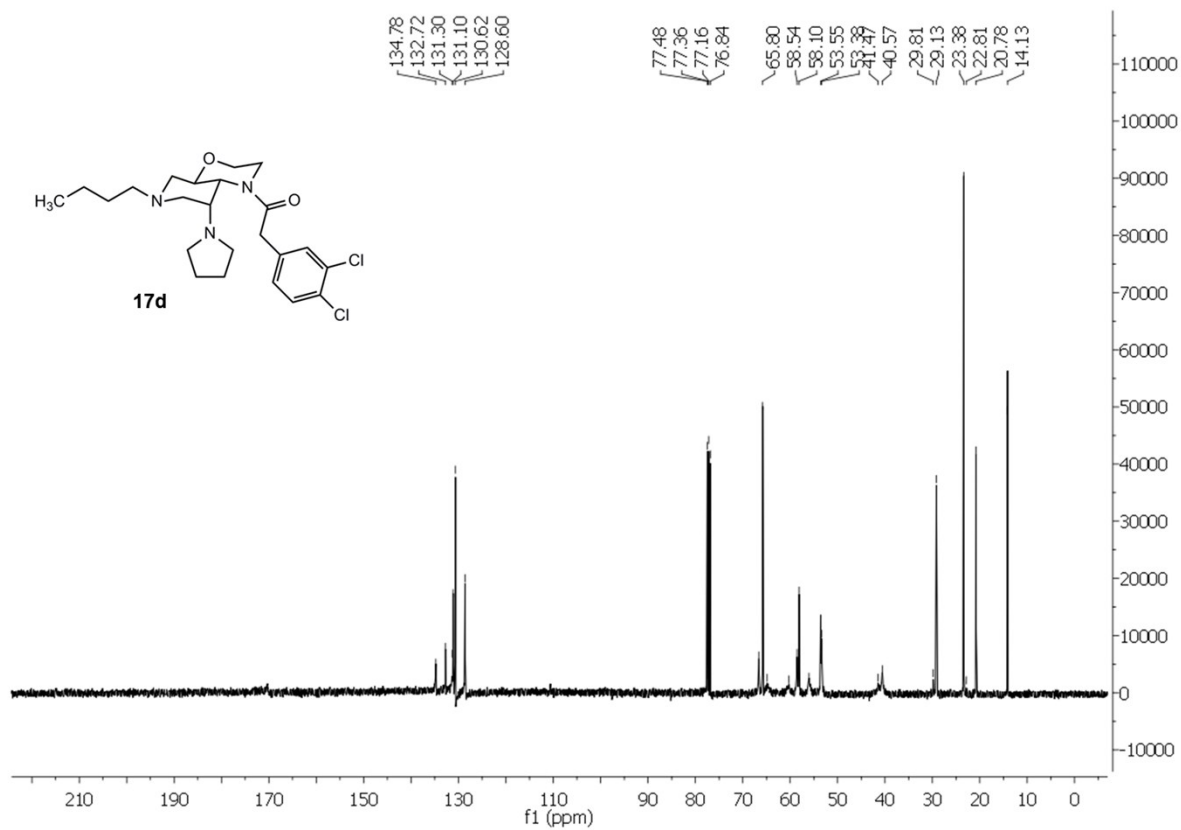

SI42

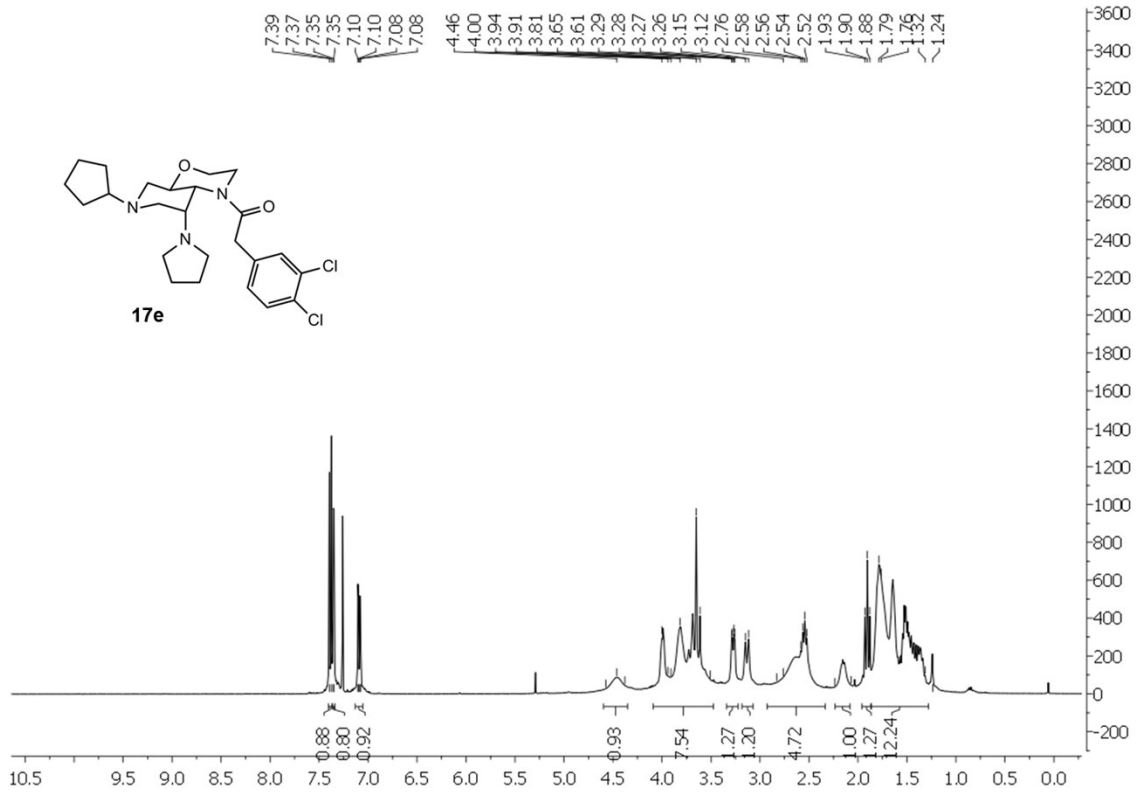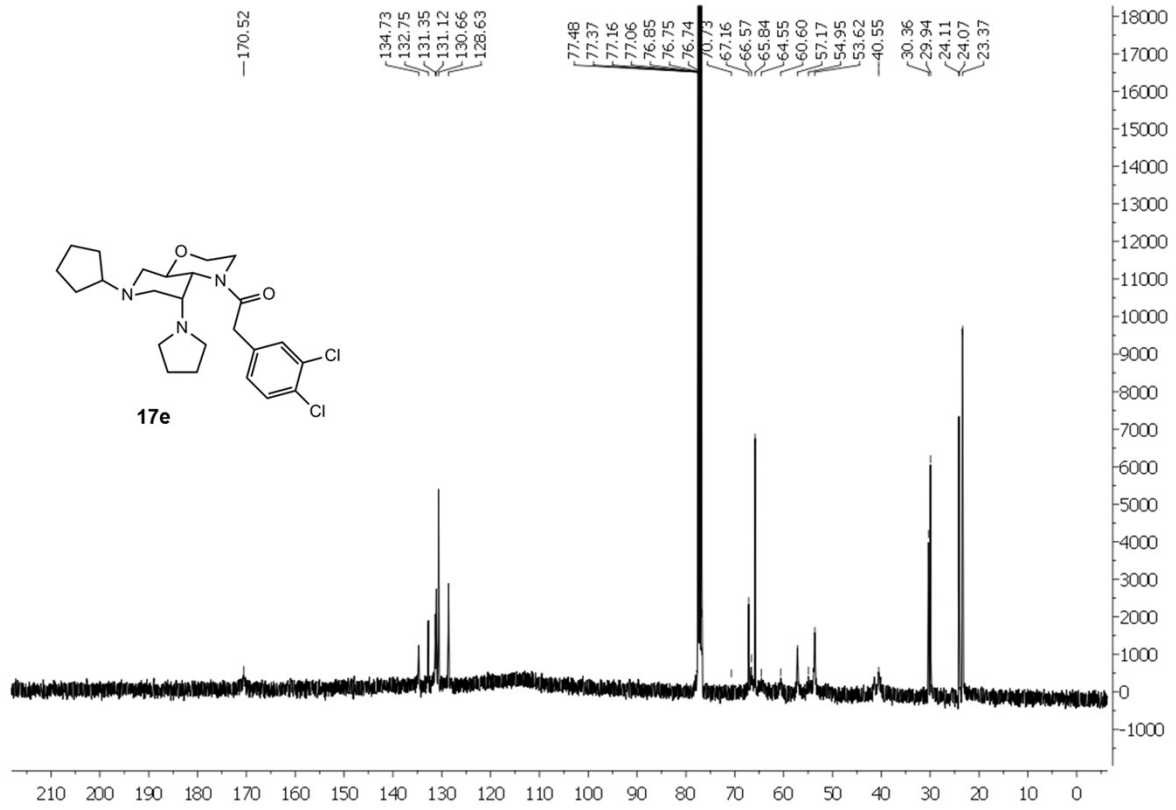

SI43

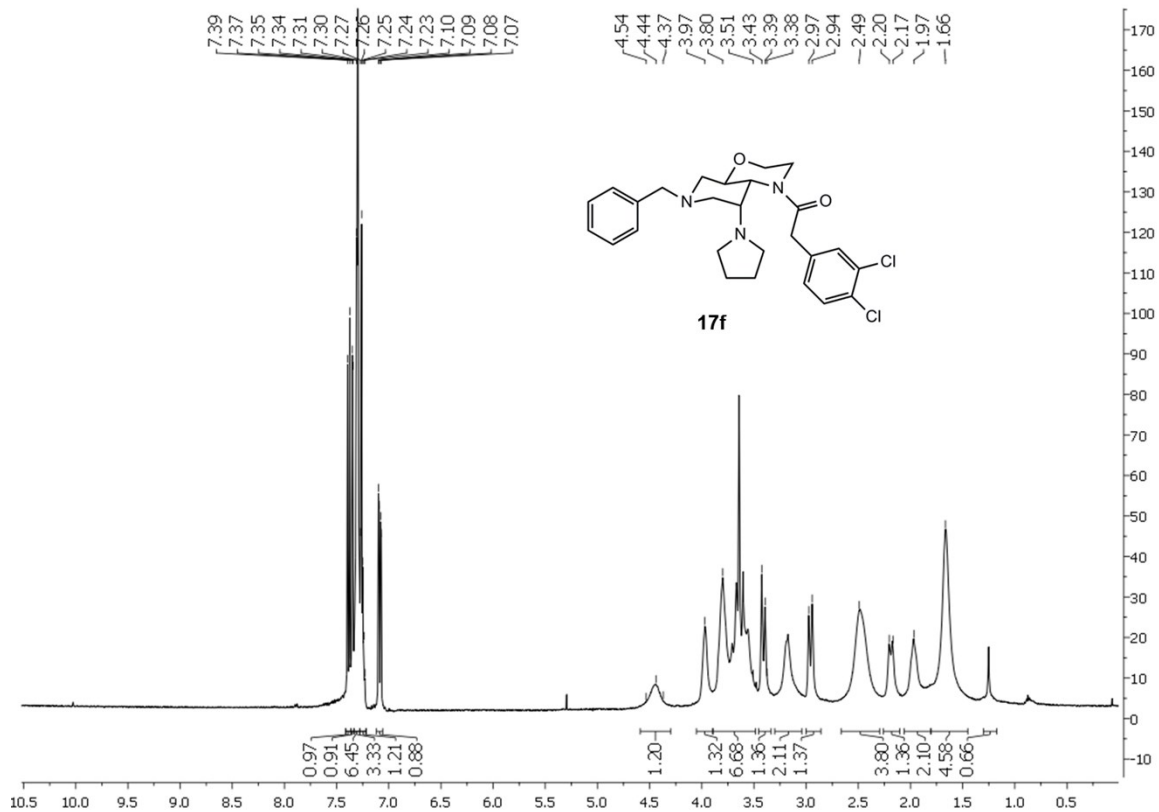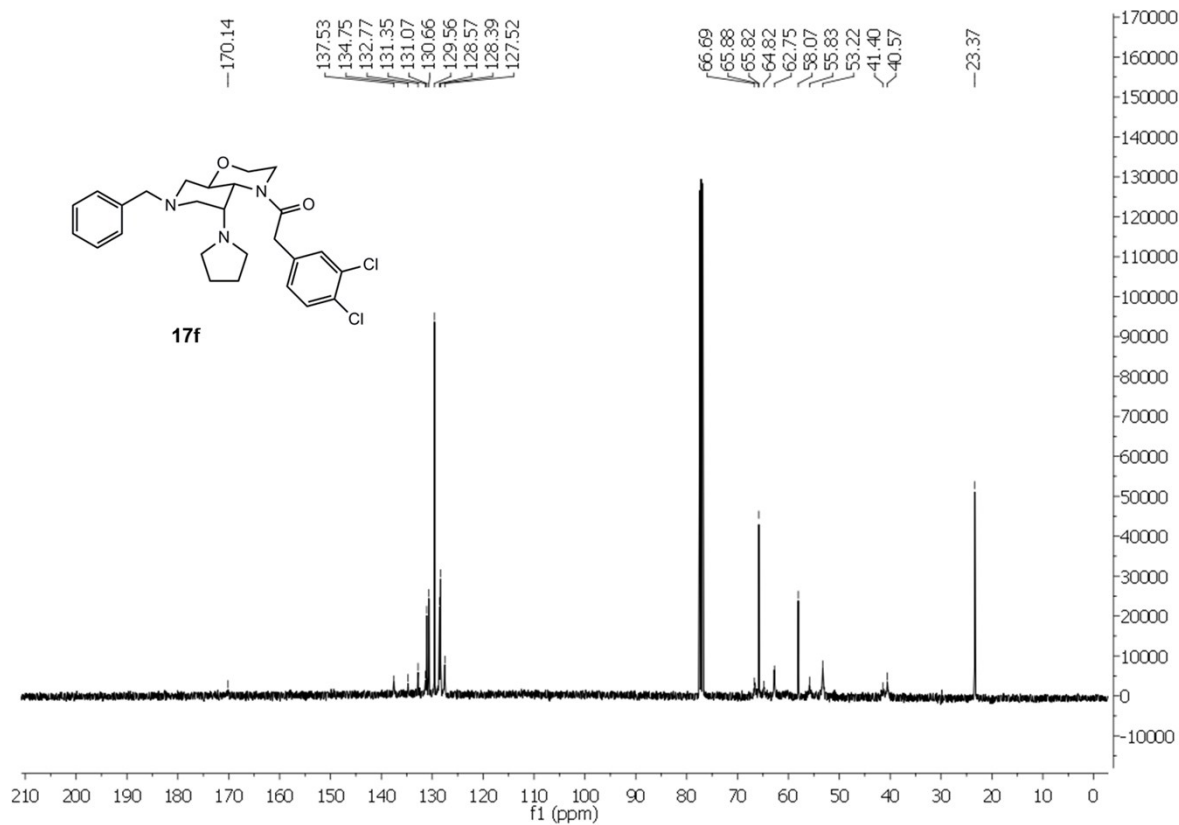

SI44

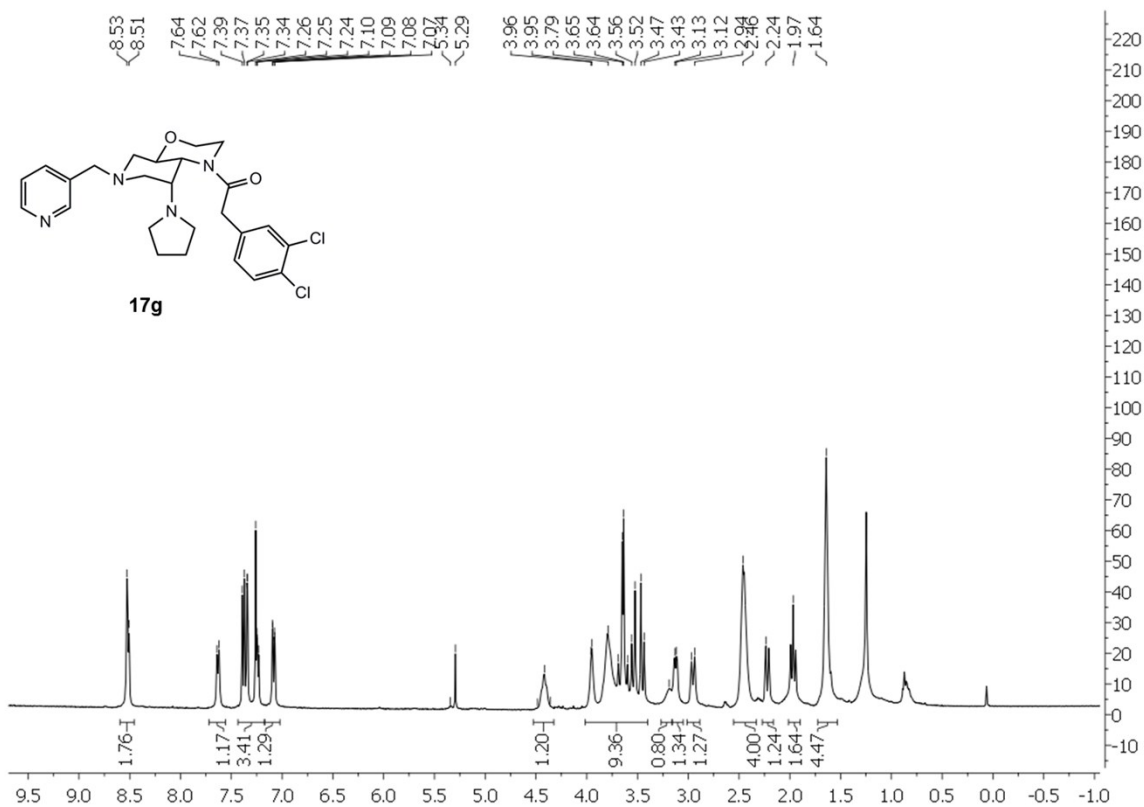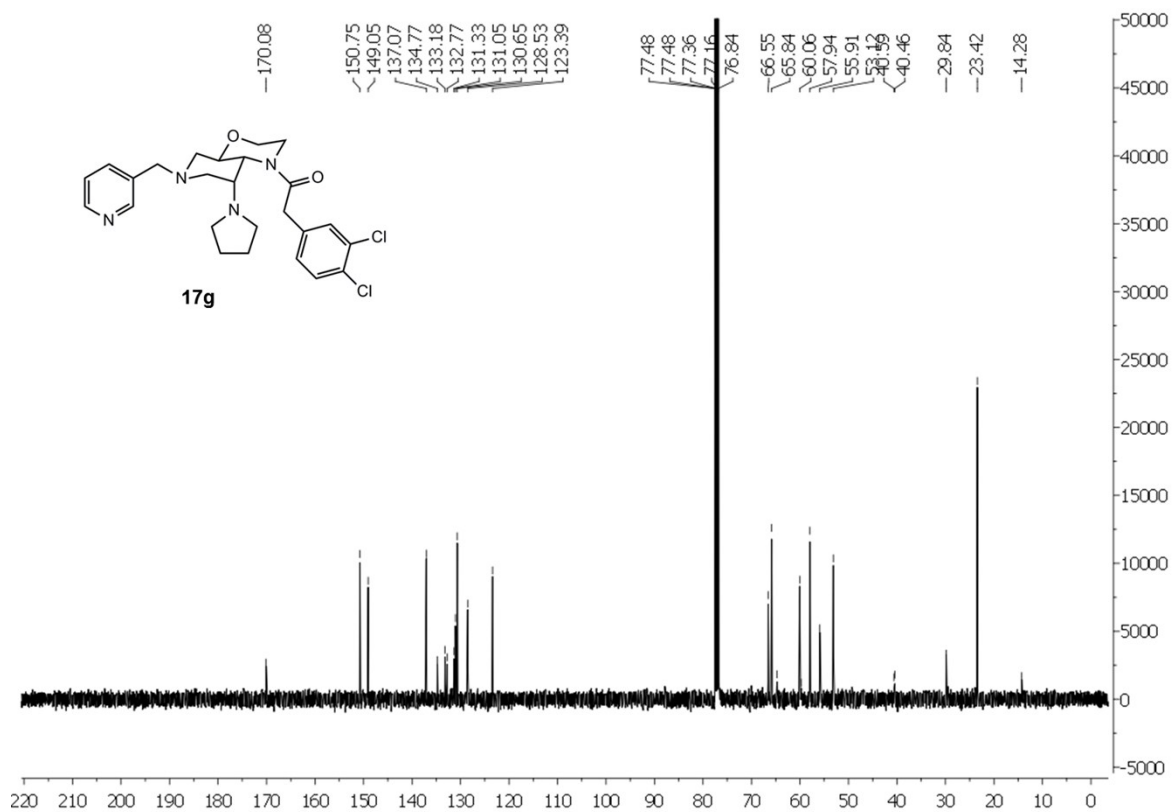

SI45

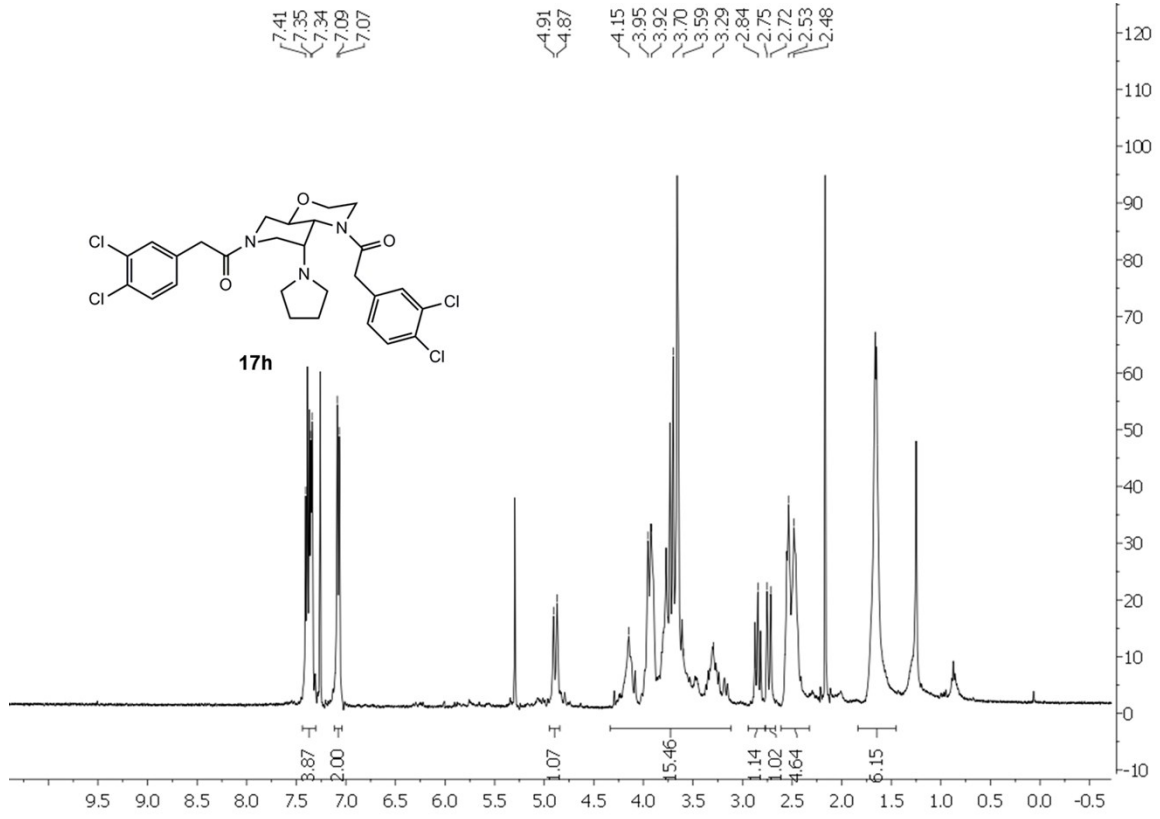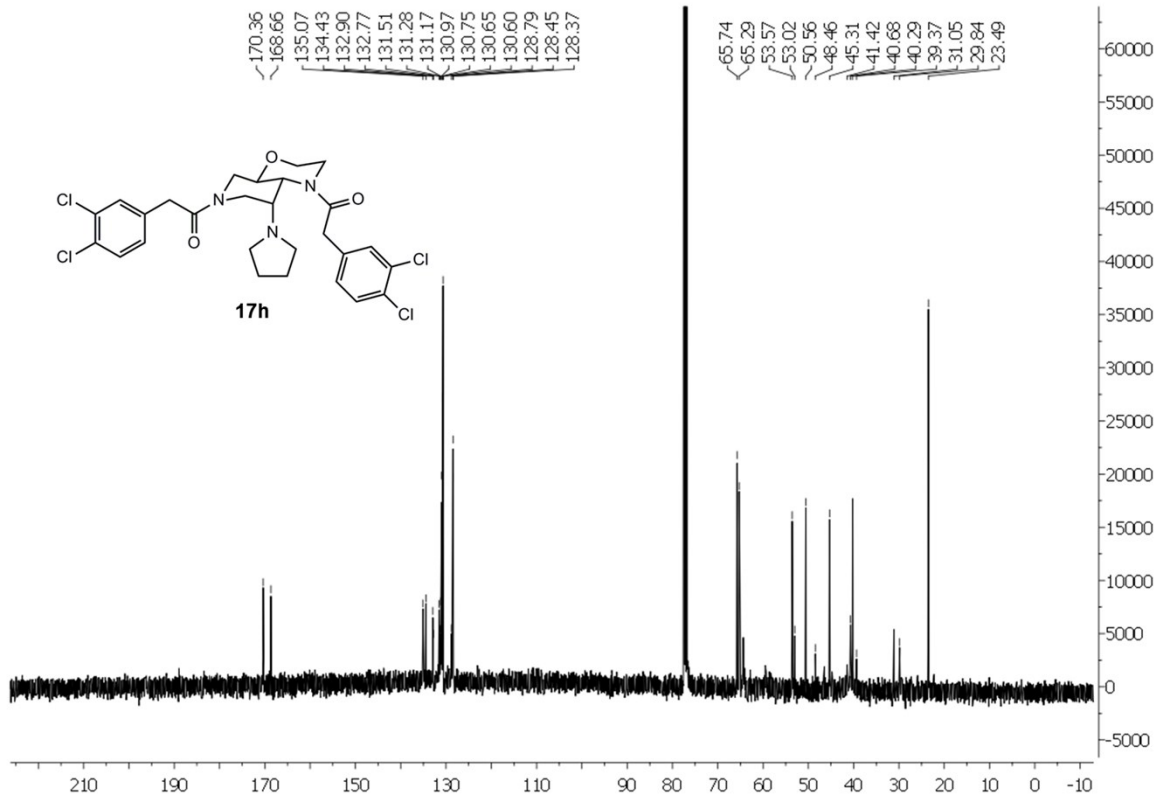

SI46

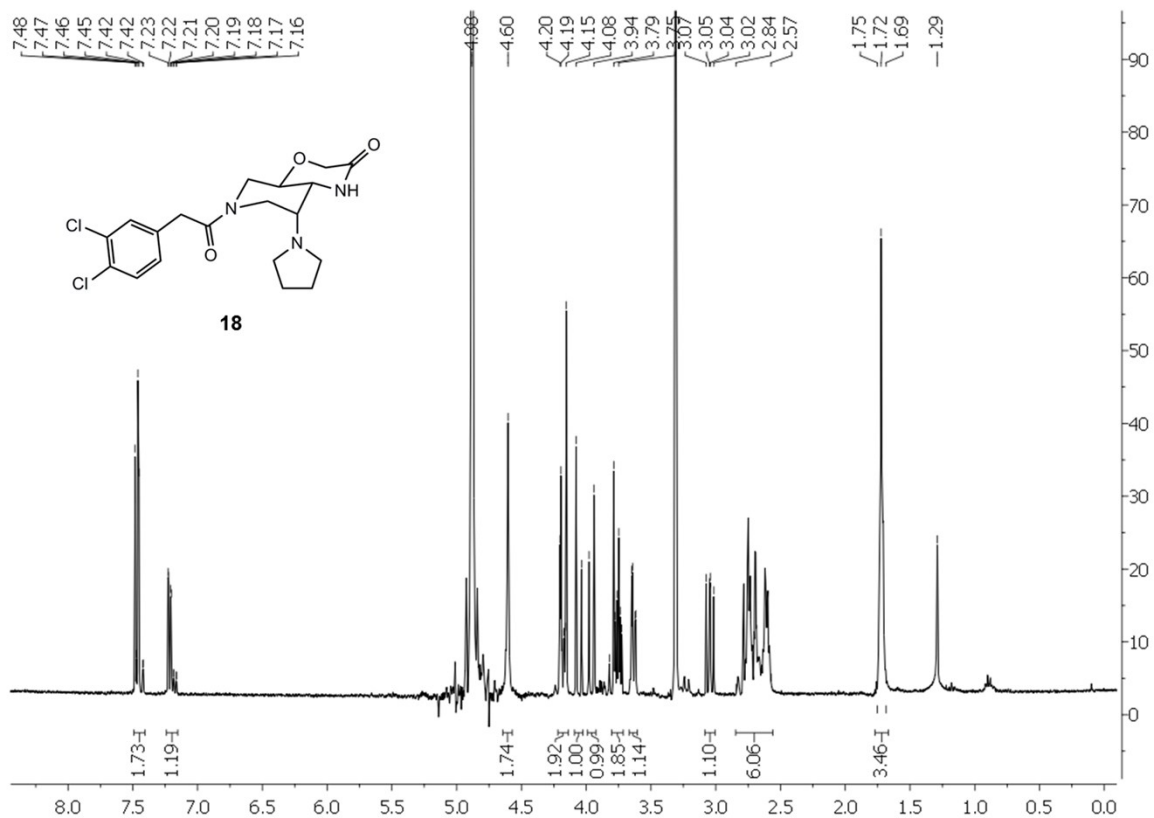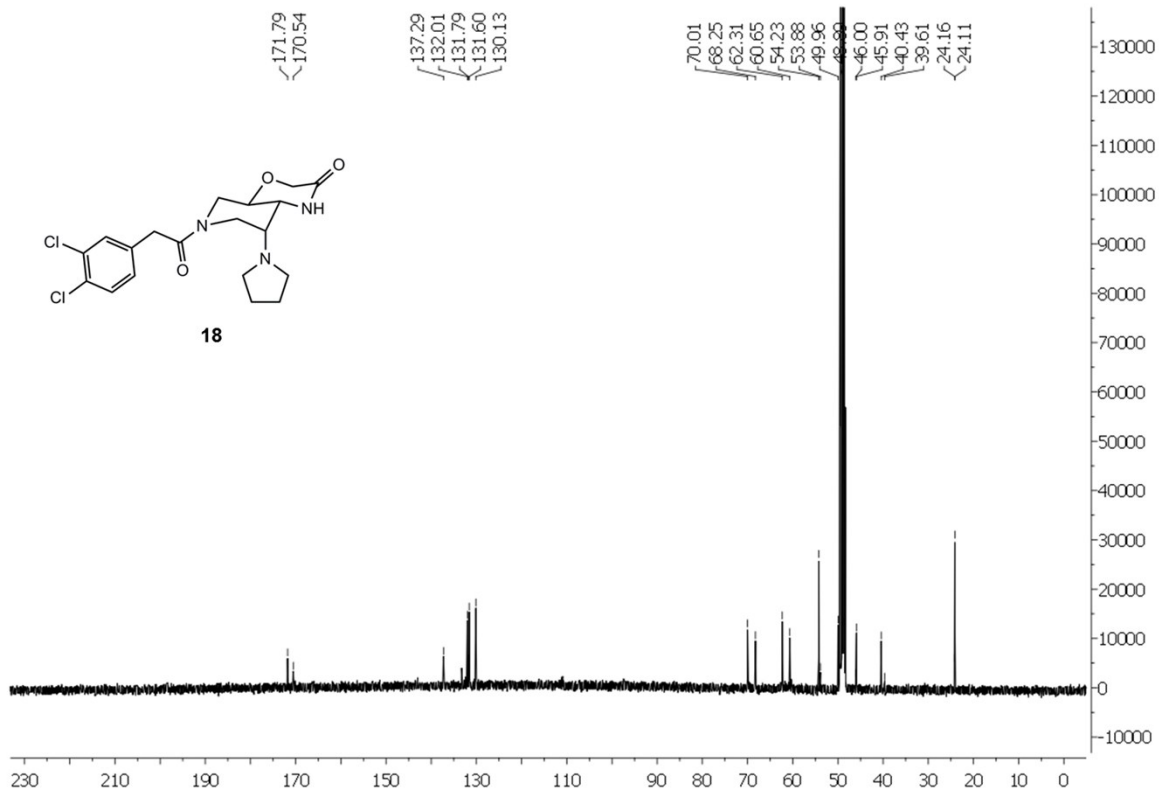

Supplement: c6md00441e1.pdf [file c6md00441e1.pdf]
